# Supplementary material for: A study of procyanidin binding to Histatin 5 using Electrospray Ionization Tandem Mass Spectrometry (ESI-MS/MS) and molecular simulations
Source: Royal Society of Chemistry journal article supplement (doi:10.1039/c4cp05586a), 2015-01-01
Supplement: c4cp05586a1.pdf [file c4cp05586a1.pdf]

## Supplementary Information

### A Study of Procyanidin Binding to Histatin 5 using Electrospray Ionization Tandem Mass Spectrometry (ESI-MS/MS) and Molecular Simulations

Joshua Shraberg, Steven W. Rick, Nalaka Rannulu, and Richard B. Cole

Department of Chemistry, University of New Orleans, New Orleans, LA, 70148, US. Fax: 504-280-6860; Tel: 504-280-7412

#### PDB coordinates for procyanidins:

##### Procyanidin B1 compact rotamer:

|        |    |     |     |   |        |        |        |      |      |   |
|--------|----|-----|-----|---|--------|--------|--------|------|------|---|
| HETATM | 1  | O1  | UNK | 1 | 27.536 | 19.487 | 89.064 | 0.00 | 0.00 | O |
| HETATM | 2  | C2  | UNK | 1 | 26.822 | 18.510 | 88.315 | 0.00 | 0.00 | C |
| HETATM | 3  | C3  | UNK | 1 | 26.178 | 17.484 | 89.257 | 0.00 | 0.00 | C |
| HETATM | 4  | C4  | UNK | 1 | 27.279 | 16.765 | 90.064 | 0.00 | 0.00 | C |
| HETATM | 5  | C5  | UNK | 1 | 29.135 | 17.413 | 91.657 | 0.00 | 0.00 | C |
| HETATM | 6  | C6  | UNK | 1 | 30.061 | 18.337 | 92.148 | 0.00 | 0.00 | C |
| HETATM | 7  | C7  | UNK | 1 | 30.131 | 19.621 | 91.612 | 0.00 | 0.00 | C |
| HETATM | 8  | C8  | UNK | 1 | 29.263 | 19.981 | 90.582 | 0.00 | 0.00 | C |
| HETATM | 9  | C9  | UNK | 1 | 28.340 | 19.063 | 90.079 | 0.00 | 0.00 | C |
| HETATM | 10 | C10 | UNK | 1 | 28.269 | 17.769 | 90.612 | 0.00 | 0.00 | C |
| HETATM | 11 | O11 | UNK | 1 | 29.687 | 16.964 | 88.513 | 0.00 | 0.00 | O |
| HETATM | 12 | C12 | UNK | 1 | 31.053 | 17.028 | 88.129 | 0.00 | 0.00 | C |
| HETATM | 13 | C13 | UNK | 1 | 31.199 | 16.332 | 86.771 | 0.00 | 0.00 | C |
| HETATM | 14 | C14 | UNK | 1 | 30.843 | 14.857 | 86.959 | 0.00 | 0.00 | C |
| HETATM | 15 | C15 | UNK | 1 | 28.900 | 13.462 | 87.759 | 0.00 | 0.00 | C |
| HETATM | 16 | C16 | UNK | 1 | 27.724 | 13.316 | 88.494 | 0.00 | 0.00 | C |
| HETATM | 17 | C17 | UNK | 1 | 27.209 | 14.384 | 89.232 | 0.00 | 0.00 | C |
| HETATM | 18 | C18 | UNK | 1 | 27.870 | 15.623 | 89.246 | 0.00 | 0.00 | C |
| HETATM | 19 | C19 | UNK | 1 | 29.055 | 15.758 | 88.503 | 0.00 | 0.00 | C |
| HETATM | 20 | C20 | UNK | 1 | 29.574 | 14.688 | 87.760 | 0.00 | 0.00 | C |
| HETATM | 21 | C21 | UNK | 1 | 25.800 | 19.223 | 87.453 | 0.00 | 0.00 | C |
| HETATM | 22 | C22 | UNK | 1 | 25.385 | 18.643 | 86.246 | 0.00 | 0.00 | C |
| HETATM | 23 | C23 | UNK | 1 | 24.442 | 19.274 | 85.433 | 0.00 | 0.00 | C |
| HETATM | 24 | C24 | UNK | 1 | 23.897 | 20.503 | 85.816 | 0.00 | 0.00 | C |
| HETATM | 25 | C25 | UNK | 1 | 24.303 | 21.090 | 87.016 | 0.00 | 0.00 | C |
| HETATM | 26 | C26 | UNK | 1 | 25.245 | 20.455 | 87.827 | 0.00 | 0.00 | C |
| HETATM | 27 | C27 | UNK | 1 | 31.411 | 18.499 | 88.090 | 0.00 | 0.00 | C |
| HETATM | 28 | C28 | UNK | 1 | 30.618 | 19.418 | 87.388 | 0.00 | 0.00 | C |
| HETATM | 29 | C29 | UNK | 1 | 30.936 | 20.779 | 87.374 | 0.00 | 0.00 | C |
| HETATM | 30 | C30 | UNK | 1 | 32.065 | 21.235 | 88.059 | 0.00 | 0.00 | C |
| HETATM | 31 | C31 | UNK | 1 | 32.864 | 20.328 | 88.754 | 0.00 | 0.00 | C |
| HETATM | 32 | C32 | UNK | 1 | 32.540 | 18.972 | 88.771 | 0.00 | 0.00 | C |
| HETATM | 33 | O33 | UNK | 1 | 25.254 | 18.114 | 90.156 | 0.00 | 0.00 | O |
| HETATM | 34 | O34 | UNK | 1 | 29.068 | 16.155 | 92.171 | 0.00 | 0.00 | O |
| HETATM | 35 | O35 | UNK | 1 | 31.054 | 20.489 | 92.107 | 0.00 | 0.00 | O |
| HETATM | 36 | O36 | UNK | 1 | 32.546 | 16.408 | 86.299 | 0.00 | 0.00 | O |
| HETATM | 37 | O37 | UNK | 1 | 29.409 | 12.425 | 87.040 | 0.00 | 0.00 | O |



CONNECT 9 8  
CONNECT 9 8  
CONNECT 9 10  
CONNECT 10 4  
CONNECT 10 5  
CONNECT 10 5  
CONNECT 10 9  
CONNECT 11 12 19  
CONNECT 12 11 13 27 54  
CONNECT 13 12 14 36 46  
CONNECT 14 13 20 47 53  
CONNECT 15 16  
CONNECT 15 16  
CONNECT 15 20 37  
CONNECT 16 15  
CONNECT 16 15  
CONNECT 16 17 52  
CONNECT 17 16  
CONNECT 17 18  
CONNECT 17 18  
CONNECT 17 38  
CONNECT 18 4  
CONNECT 18 17  
CONNECT 18 17  
CONNECT 18 19  
CONNECT 19 11 18  
CONNECT 19 20  
CONNECT 19 20  
CONNECT 20 14 15  
CONNECT 20 19  
CONNECT 20 19  
CONNECT 21 2 22  
CONNECT 21 26  
CONNECT 21 26  
CONNECT 22 21  
CONNECT 22 23  
CONNECT 22 23  
CONNECT 22 48  
CONNECT 23 22  
CONNECT 23 22  
CONNECT 23 24 39  
CONNECT 24 23  
CONNECT 24 25  
CONNECT 24 25  
CONNECT 24 40  
CONNECT 25 24  
CONNECT 25 24  
CONNECT 25 26 58  
CONNECT 26 21  
CONNECT 26 21  
CONNECT 26 25 49

CONNECT 27 12 28  
CONNECT 27 32  
CONNECT 27 32  
CONNECT 28 27  
CONNECT 28 29  
CONNECT 28 29  
CONNECT 28 56  
CONNECT 29 28  
CONNECT 29 28  
CONNECT 29 30 41  
CONNECT 30 29  
CONNECT 30 31  
CONNECT 30 31  
CONNECT 30 42  
CONNECT 31 30  
CONNECT 31 30  
CONNECT 31 32 50  
CONNECT 32 27  
CONNECT 32 27  
CONNECT 32 31 51  
CONNECT 33 3 59  
CONNECT 34 5 60  
CONNECT 35 7 61  
CONNECT 36 13 62  
CONNECT 37 15 63  
CONNECT 38 17 64  
CONNECT 39 23 65  
CONNECT 40 24 66  
CONNECT 41 29 67  
CONNECT 42 30 68  
CONNECT 43 6  
CONNECT 44 3  
CONNECT 45 8  
CONNECT 46 13  
CONNECT 47 14  
CONNECT 48 22  
CONNECT 49 26  
CONNECT 50 31  
CONNECT 51 32  
CONNECT 52 16  
CONNECT 53 14  
CONNECT 54 12  
CONNECT 55 2  
CONNECT 56 28  
CONNECT 57 4  
CONNECT 58 25  
CONNECT 59 33  
CONNECT 60 34  
CONNECT 61 35  
CONNECT 62 36  
CONNECT 63 37

CONNECT 64 38  
CONNECT 65 39  
CONNECT 66 40  
CONNECT 67 41  
CONNECT 68 42  
END

**Procyanidin B1 extended rotamer:**

|        |    |     |     |   |        |        |        |      |      |   |
|--------|----|-----|-----|---|--------|--------|--------|------|------|---|
| HETATM | 1  | O1  | UNK | 1 | 24.636 | 17.768 | 89.372 | 0.00 | 0.00 | O |
| HETATM | 2  | C2  | UNK | 1 | 24.807 | 16.418 | 89.785 | 0.00 | 0.00 | C |
| HETATM | 3  | C3  | UNK | 1 | 25.983 | 16.306 | 90.764 | 0.00 | 0.00 | C |
| HETATM | 4  | C4  | UNK | 1 | 27.279 | 16.765 | 90.064 | 0.00 | 0.00 | C |
| HETATM | 5  | C5  | UNK | 1 | 28.128 | 18.854 | 88.916 | 0.00 | 0.00 | C |
| HETATM | 6  | C6  | UNK | 1 | 27.907 | 20.041 | 88.212 | 0.00 | 0.00 | C |
| HETATM | 7  | C7  | UNK | 1 | 26.611 | 20.452 | 87.908 | 0.00 | 0.00 | C |
| HETATM | 8  | C8  | UNK | 1 | 25.531 | 19.672 | 88.320 | 0.00 | 0.00 | C |
| HETATM | 9  | C9  | UNK | 1 | 25.741 | 18.481 | 89.016 | 0.00 | 0.00 | C |
| HETATM | 10 | C10 | UNK | 1 | 27.043 | 18.061 | 89.319 | 0.00 | 0.00 | C |
| HETATM | 11 | O11 | UNK | 1 | 28.873 | 14.647 | 91.164 | 0.00 | 0.00 | O |
| HETATM | 12 | C12 | UNK | 1 | 29.282 | 13.462 | 91.833 | 0.00 | 0.00 | C |
| HETATM | 13 | C13 | UNK | 1 | 30.482 | 12.879 | 91.080 | 0.00 | 0.00 | C |
| HETATM | 14 | C14 | UNK | 1 | 30.009 | 12.477 | 89.682 | 0.00 | 0.00 | C |
| HETATM | 15 | C15 | UNK | 1 | 28.927 | 13.542 | 87.668 | 0.00 | 0.00 | C |
| HETATM | 16 | C16 | UNK | 1 | 28.161 | 14.551 | 87.085 | 0.00 | 0.00 | C |
| HETATM | 17 | C17 | UNK | 1 | 27.636 | 15.584 | 87.862 | 0.00 | 0.00 | C |
| HETATM | 18 | C18 | UNK | 1 | 27.870 | 15.623 | 89.246 | 0.00 | 0.00 | C |
| HETATM | 19 | C19 | UNK | 1 | 28.642 | 14.599 | 89.823 | 0.00 | 0.00 | C |
| HETATM | 20 | C20 | UNK | 1 | 29.172 | 13.561 | 89.045 | 0.00 | 0.00 | C |
| HETATM | 21 | C21 | UNK | 1 | 23.504 | 15.935 | 90.391 | 0.00 | 0.00 | C |
| HETATM | 22 | C22 | UNK | 1 | 23.180 | 14.572 | 90.344 | 0.00 | 0.00 | C |
| HETATM | 23 | C23 | UNK | 1 | 21.990 | 14.098 | 90.897 | 0.00 | 0.00 | C |
| HETATM | 24 | C24 | UNK | 1 | 21.099 | 14.984 | 91.508 | 0.00 | 0.00 | C |
| HETATM | 25 | C25 | UNK | 1 | 21.412 | 16.345 | 91.561 | 0.00 | 0.00 | C |
| HETATM | 26 | C26 | UNK | 1 | 22.603 | 16.815 | 91.007 | 0.00 | 0.00 | C |
| HETATM | 27 | C27 | UNK | 1 | 29.608 | 13.872 | 93.254 | 0.00 | 0.00 | C |
| HETATM | 28 | C28 | UNK | 1 | 30.463 | 14.953 | 93.517 | 0.00 | 0.00 | C |
| HETATM | 29 | C29 | UNK | 1 | 30.744 | 15.346 | 94.828 | 0.00 | 0.00 | C |
| HETATM | 30 | C30 | UNK | 1 | 30.175 | 14.649 | 95.898 | 0.00 | 0.00 | C |
| HETATM | 31 | C31 | UNK | 1 | 29.330 | 13.570 | 95.648 | 0.00 | 0.00 | C |
| HETATM | 32 | C32 | UNK | 1 | 29.047 | 13.185 | 94.338 | 0.00 | 0.00 | C |
| HETATM | 33 | O33 | UNK | 1 | 25.760 | 17.101 | 91.936 | 0.00 | 0.00 | O |
| HETATM | 34 | O34 | UNK | 1 | 29.392 | 18.443 | 89.207 | 0.00 | 0.00 | O |
| HETATM | 35 | O35 | UNK | 1 | 26.436 | 21.607 | 87.210 | 0.00 | 0.00 | O |
| HETATM | 36 | O36 | UNK | 1 | 30.979 | 11.709 | 91.734 | 0.00 | 0.00 | O |
| HETATM | 37 | O37 | UNK | 1 | 29.440 | 12.530 | 86.916 | 0.00 | 0.00 | O |
| HETATM | 38 | O38 | UNK | 1 | 26.895 | 16.569 | 87.282 | 0.00 | 0.00 | O |
| HETATM | 39 | O39 | UNK | 1 | 21.719 | 12.767 | 90.828 | 0.00 | 0.00 | O |
| HETATM | 40 | O40 | UNK | 1 | 19.945 | 14.495 | 92.039 | 0.00 | 0.00 | O |
| HETATM | 41 | O41 | UNK | 1 | 31.556 | 16.406 | 95.093 | 0.00 | 0.00 | O |
| HETATM | 42 | O42 | UNK | 1 | 30.425 | 15.009 | 97.185 | 0.00 | 0.00 | O |



CONNECT 10 5  
CONNECT 10 9  
CONNECT 11 12 19  
CONNECT 12 11 13 27 54  
CONNECT 13 12 14 36 46  
CONNECT 14 13 20 47 53  
CONNECT 15 16  
CONNECT 15 16  
CONNECT 15 20 37  
CONNECT 16 15  
CONNECT 16 15  
CONNECT 16 17 52  
CONNECT 17 16  
CONNECT 17 18  
CONNECT 17 18  
CONNECT 17 38  
CONNECT 18 4  
CONNECT 18 17  
CONNECT 18 17  
CONNECT 18 19  
CONNECT 19 11 18  
CONNECT 19 20  
CONNECT 19 20  
CONNECT 20 14 15  
CONNECT 20 19  
CONNECT 20 19  
CONNECT 21 2 22  
CONNECT 21 26  
CONNECT 21 26  
CONNECT 22 21  
CONNECT 22 23  
CONNECT 22 23  
CONNECT 22 48  
CONNECT 23 22  
CONNECT 23 22  
CONNECT 23 24 39  
CONNECT 24 23  
CONNECT 24 25  
CONNECT 24 25  
CONNECT 24 40  
CONNECT 25 24  
CONNECT 25 24  
CONNECT 25 26 58  
CONNECT 26 21  
CONNECT 26 21  
CONNECT 26 25 49  
CONNECT 27 12 28  
CONNECT 27 32  
CONNECT 27 32  
CONNECT 28 27  
CONNECT 28 29

CONNECT 28 29  
CONNECT 28 56  
CONNECT 29 28  
CONNECT 29 28  
CONNECT 29 30 41  
CONNECT 30 29  
CONNECT 30 31  
CONNECT 30 31  
CONNECT 30 42  
CONNECT 31 30  
CONNECT 31 30  
CONNECT 31 32 50  
CONNECT 32 27  
CONNECT 32 27  
CONNECT 32 31 51  
CONNECT 33 3 59  
CONNECT 34 5 60  
CONNECT 35 7 61  
CONNECT 36 13 62  
CONNECT 37 15 63  
CONNECT 38 17 64  
CONNECT 39 23 65  
CONNECT 40 24 66  
CONNECT 41 29 67  
CONNECT 42 30 68  
CONNECT 43 6  
CONNECT 44 3  
CONNECT 45 8  
CONNECT 46 13  
CONNECT 47 14  
CONNECT 48 22  
CONNECT 49 26  
CONNECT 50 31  
CONNECT 51 32  
CONNECT 52 16  
CONNECT 53 14  
CONNECT 54 12  
CONNECT 55 2  
CONNECT 56 28  
CONNECT 57 4  
CONNECT 58 25  
CONNECT 59 33  
CONNECT 60 34  
CONNECT 61 35  
CONNECT 62 36  
CONNECT 63 37  
CONNECT 64 38  
CONNECT 65 39  
CONNECT 66 40  
CONNECT 67 41  
CONNECT 68 42



END

**Procyanidin B2 compact rotamer:**

|        |    |     |     |   |         |        |        |      |      |   |
|--------|----|-----|-----|---|---------|--------|--------|------|------|---|
| HETATM | 1  | C1  | UNK | 1 | -31.207 | 27.871 | 22.310 | 0.00 | 0.00 | C |
| HETATM | 2  | C2  | UNK | 1 | -30.468 | 26.944 | 21.560 | 0.00 | 0.00 | C |
| HETATM | 3  | C3  | UNK | 1 | -29.941 | 25.814 | 22.200 | 0.00 | 0.00 | C |
| HETATM | 4  | C4  | UNK | 1 | -30.155 | 25.616 | 23.565 | 0.00 | 0.00 | C |
| HETATM | 5  | C5  | UNK | 1 | -30.904 | 26.530 | 24.305 | 0.00 | 0.00 | C |
| HETATM | 6  | C6  | UNK | 1 | -31.424 | 27.658 | 23.674 | 0.00 | 0.00 | C |
| HETATM | 7  | C9  | UNK | 1 | -29.105 | 26.266 | 19.561 | 0.00 | 0.00 | C |
| HETATM | 8  | C10 | UNK | 1 | -29.266 | 24.846 | 20.121 | 0.00 | 0.00 | C |
| HETATM | 9  | C11 | UNK | 1 | -30.250 | 27.160 | 20.079 | 0.00 | 0.00 | C |
| HETATM | 10 | O14 | UNK | 1 | -29.213 | 24.869 | 21.542 | 0.00 | 0.00 | O |
| HETATM | 11 | O15 | UNK | 1 | -31.721 | 28.966 | 21.687 | 0.00 | 0.00 | O |
| HETATM | 12 | O16 | UNK | 1 | -31.147 | 26.350 | 25.631 | 0.00 | 0.00 | O |
| HETATM | 13 | C17 | UNK | 1 | -28.188 | 23.907 | 19.618 | 0.00 | 0.00 | C |
| HETATM | 14 | C18 | UNK | 1 | -26.996 | 23.702 | 20.329 | 0.00 | 0.00 | C |
| HETATM | 15 | C19 | UNK | 1 | -26.010 | 22.837 | 19.845 | 0.00 | 0.00 | C |
| HETATM | 16 | C20 | UNK | 1 | -26.209 | 22.165 | 18.636 | 0.00 | 0.00 | C |
| HETATM | 17 | C21 | UNK | 1 | -27.390 | 22.361 | 17.922 | 0.00 | 0.00 | C |
| HETATM | 18 | C22 | UNK | 1 | -28.371 | 23.224 | 18.408 | 0.00 | 0.00 | C |
| HETATM | 19 | O26 | UNK | 1 | -27.843 | 26.832 | 19.941 | 0.00 | 0.00 | O |
| HETATM | 20 | O27 | UNK | 1 | -24.849 | 22.631 | 20.525 | 0.00 | 0.00 | O |
| HETATM | 21 | O28 | UNK | 1 | -25.269 | 21.317 | 18.138 | 0.00 | 0.00 | O |
| HETATM | 22 | C34 | UNK | 1 | -33.736 | 26.783 | 17.523 | 0.00 | 0.00 | C |
| HETATM | 23 | C35 | UNK | 1 | -33.656 | 26.010 | 18.686 | 0.00 | 0.00 | C |
| HETATM | 24 | C36 | UNK | 1 | -32.529 | 26.125 | 19.511 | 0.00 | 0.00 | C |
| HETATM | 25 | C37 | UNK | 1 | -31.481 | 27.005 | 19.194 | 0.00 | 0.00 | C |
| HETATM | 26 | C38 | UNK | 1 | -31.580 | 27.771 | 18.022 | 0.00 | 0.00 | C |
| HETATM | 27 | C39 | UNK | 1 | -32.700 | 27.657 | 17.197 | 0.00 | 0.00 | C |
| HETATM | 28 | C41 | UNK | 1 | -34.413 | 24.090 | 20.165 | 0.00 | 0.00 | C |
| HETATM | 29 | C42 | UNK | 1 | -33.607 | 24.852 | 21.226 | 0.00 | 0.00 | C |
| HETATM | 30 | C43 | UNK | 1 | -34.776 | 25.062 | 19.038 | 0.00 | 0.00 | C |
| HETATM | 31 | O46 | UNK | 1 | -32.423 | 25.374 | 20.642 | 0.00 | 0.00 | O |
| HETATM | 32 | O47 | UNK | 1 | -34.835 | 26.672 | 16.727 | 0.00 | 0.00 | O |
| HETATM | 33 | O48 | UNK | 1 | -30.571 | 28.624 | 17.693 | 0.00 | 0.00 | O |
| HETATM | 34 | C49 | UNK | 1 | -33.195 | 24.005 | 22.413 | 0.00 | 0.00 | C |
| HETATM | 35 | C50 | UNK | 1 | -33.851 | 24.150 | 23.645 | 0.00 | 0.00 | C |
| HETATM | 36 | C51 | UNK | 1 | -33.468 | 23.395 | 24.757 | 0.00 | 0.00 | C |
| HETATM | 37 | C52 | UNK | 1 | -32.418 | 22.478 | 24.648 | 0.00 | 0.00 | C |
| HETATM | 38 | C53 | UNK | 1 | -31.759 | 22.326 | 23.429 | 0.00 | 0.00 | C |
| HETATM | 39 | C54 | UNK | 1 | -32.142 | 23.084 | 22.323 | 0.00 | 0.00 | C |
| HETATM | 40 | O58 | UNK | 1 | -33.675 | 22.997 | 19.608 | 0.00 | 0.00 | O |
| HETATM | 41 | O59 | UNK | 1 | -34.090 | 23.533 | 25.961 | 0.00 | 0.00 | O |
| HETATM | 42 | O60 | UNK | 1 | -32.019 | 21.732 | 25.712 | 0.00 | 0.00 | O |
| HETATM | 43 | H7  | UNK | 1 | -29.738 | 24.718 | 24.048 | 0.00 | 0.00 | H |
| HETATM | 44 | H8  | UNK | 1 | -32.013 | 28.379 | 24.264 | 0.00 | 0.00 | H |
| HETATM | 45 | H12 | UNK | 1 | -29.152 | 26.229 | 18.448 | 0.00 | 0.00 | H |
| HETATM | 46 | H13 | UNK | 1 | -30.249 | 24.433 | 19.803 | 0.00 | 0.00 | H |
| HETATM | 47 | H23 | UNK | 1 | -26.833 | 24.232 | 21.282 | 0.00 | 0.00 | H |



CONNECT 13 18  
CONNECT 14 13  
CONNECT 14 13  
CONNECT 14 15 47  
CONNECT 15 14  
CONNECT 15 16  
CONNECT 15 16  
CONNECT 15 20  
CONNECT 16 15  
CONNECT 16 15  
CONNECT 16 17 21  
CONNECT 17 16  
CONNECT 17 18  
CONNECT 17 18  
CONNECT 17 48  
CONNECT 18 13  
CONNECT 18 17  
CONNECT 18 17  
CONNECT 18 49  
CONNECT 19 7 52  
CONNECT 20 15 53  
CONNECT 21 16 54  
CONNECT 22 23  
CONNECT 22 23  
CONNECT 22 27 32  
CONNECT 23 22  
CONNECT 23 22  
CONNECT 23 24 30  
CONNECT 24 23  
CONNECT 24 25  
CONNECT 24 25  
CONNECT 24 31  
CONNECT 25 9  
CONNECT 25 24  
CONNECT 25 24  
CONNECT 25 26  
CONNECT 26 25  
CONNECT 26 27  
CONNECT 26 27  
CONNECT 26 33  
CONNECT 27 22  
CONNECT 27 26  
CONNECT 27 26  
CONNECT 27 55  
CONNECT 28 29 30 40 56  
CONNECT 29 28 31 34 57  
CONNECT 30 23 28 61 67  
CONNECT 31 24 29  
CONNECT 32 22 62  
CONNECT 33 26 63  
CONNECT 34 29

CONNECT 34 35  
CONNECT 34 35  
CONNECT 34 39  
CONNECT 35 34  
CONNECT 35 34  
CONNECT 35 36 58  
CONNECT 36 35  
CONNECT 36 37  
CONNECT 36 37  
CONNECT 36 41  
CONNECT 37 36  
CONNECT 37 36  
CONNECT 37 38 42  
CONNECT 38 37  
CONNECT 38 39  
CONNECT 38 39  
CONNECT 38 59  
CONNECT 39 34  
CONNECT 39 38  
CONNECT 39 38  
CONNECT 39 60  
CONNECT 40 28 64  
CONNECT 41 36 65  
CONNECT 42 37 66  
CONNECT 43 4  
CONNECT 44 6  
CONNECT 45 7  
CONNECT 46 8  
CONNECT 47 14  
CONNECT 48 17  
CONNECT 49 18  
CONNECT 50 11  
CONNECT 51 12  
CONNECT 52 19  
CONNECT 53 20  
CONNECT 54 21  
CONNECT 55 27  
CONNECT 56 28  
CONNECT 57 29  
CONNECT 58 35  
CONNECT 59 38  
CONNECT 60 39  
CONNECT 61 30  
CONNECT 62 32  
CONNECT 63 33  
CONNECT 64 40  
CONNECT 65 41  
CONNECT 66 42  
CONNECT 67 30  
CONNECT 68 9  
END

### Procyanidin B2 extended rotamer:

|        |    |     |      |   |         |        |         |      |      |   |
|--------|----|-----|------|---|---------|--------|---------|------|------|---|
| HETATM | 1  | C1  | -0.1 | 1 | -30.660 | 7.057  | -3.907  | 0.00 | 0.00 | C |
| HETATM | 2  | C3  | -0.1 | 1 | -29.558 | 5.279  | -2.680  | 0.00 | 0.00 | C |
| HETATM | 3  | C5  | -0.1 | 1 | -28.360 | 7.309  | -3.172  | 0.00 | 0.00 | C |
| HETATM | 4  | C13 | -0.1 | 1 | -35.065 | 2.497  | -2.683  | 0.00 | 0.00 | C |
| HETATM | 5  | C16 | -0.1 | 1 | -34.869 | 4.195  | -4.879  | 0.00 | 0.00 | C |
| HETATM | 6  | C17 | -0.1 | 1 | -34.042 | 4.425  | -3.770  | 0.00 | 0.00 | C |
| HETATM | 7  | C18 | -0.1 | 1 | -34.161 | 3.560  | -2.671  | 0.00 | 0.00 | C |
| HETATM | 8  | O23 | -0.1 | 1 | -31.790 | 4.982  | -3.366  | 0.00 | 0.00 | O |
| HETATM | 9  | C24 | -0.1 | 1 | -33.946 | 10.812 | -4.012  | 0.00 | 0.00 | C |
| HETATM | 10 | C26 | -0.1 | 1 | -32.596 | 8.766  | -3.941  | 0.00 | 0.00 | C |
| HETATM | 11 | C28 | -0.1 | 1 | -33.211 | 9.908  | -1.891  | 0.00 | 0.00 | C |
| HETATM | 12 | C38 | -0.1 | 1 | -32.512 | 10.118 | -10.127 | 0.00 | 0.00 | C |
| HETATM | 13 | C39 | -0.1 | 1 | -32.766 | 10.360 | -8.777  | 0.00 | 0.00 | C |
| HETATM | 14 | C40 | -0.1 | 1 | -34.029 | 10.110 | -8.225  | 0.00 | 0.00 | C |
| HETATM | 15 | C41 | -0.1 | 1 | -35.034 | 9.614  | -9.066  | 0.00 | 0.00 | C |
| HETATM | 16 | O46 | -0.1 | 1 | -33.310 | 9.649  | -6.020  | 0.00 | 0.00 | O |
| HETATM | 17 | O49 | -0.1 | 1 | -36.768 | 1.250  | -3.840  | 0.00 | 0.00 | O |
| HETATM | 18 | O51 | -0.1 | 1 | -36.552 | 2.954  | -6.000  | 0.00 | 0.00 | O |
| HETATM | 19 | O53 | -0.1 | 1 | -34.515 | 11.855 | -1.882  | 0.00 | 0.00 | O |
| HETATM | 20 | O55 | -0.1 | 1 | -31.886 | 7.922  | -1.821  | 0.00 | 0.00 | O |
| HETATM | 21 | O59 | -0.1 | 1 | -27.282 | 5.582  | -1.955  | 0.00 | 0.00 | O |
| HETATM | 22 | O61 | -0.1 | 1 | -29.456 | 9.055  | -4.394  | 0.00 | 0.00 | O |
| HETATM | 23 | O63 | -0.1 | 1 | -33.301 | 9.369  | -12.274 | 0.00 | 0.00 | O |
| HETATM | 24 | O65 | -0.1 | 1 | -35.793 | 8.880  | -11.192 | 0.00 | 0.00 | O |
| HETATM | 25 | C2  | 0.00 | 1 | -30.687 | 5.782  | -3.326  | 0.00 | 0.00 | C |
| HETATM | 26 | C4  | 0.00 | 1 | -28.393 | 6.041  | -2.593  | 0.00 | 0.00 | C |
| HETATM | 27 | C6  | 0.00 | 1 | -29.483 | 7.817  | -3.830  | 0.00 | 0.00 | C |
| HETATM | 28 | C14 | 0.00 | 1 | -35.876 | 2.278  | -3.797  | 0.00 | 0.00 | C |
| HETATM | 29 | C15 | 0.00 | 1 | -35.776 | 3.134  | -4.897  | 0.00 | 0.00 | C |
| HETATM | 30 | C25 | 0.00 | 1 | -33.293 | 9.752  | -4.661  | 0.00 | 0.00 | C |
| HETATM | 31 | C27 | 0.00 | 1 | -32.561 | 8.860  | -2.541  | 0.00 | 0.00 | C |
| HETATM | 32 | C29 | 0.00 | 1 | -33.903 | 10.879 | -2.611  | 0.00 | 0.00 | C |
| HETATM | 33 | C36 | 0.00 | 1 | -34.787 | 9.368  | -10.418 | 0.00 | 0.00 | C |
| HETATM | 34 | C37 | 0.00 | 1 | -33.520 | 9.621  | -10.954 | 0.00 | 0.00 | C |
| HETATM | 35 | H22 | 0.00 | 1 | -33.382 | 6.209  | -2.841  | 0.00 | 0.00 | H |
| HETATM | 36 | H45 | 0.00 | 1 | -35.301 | 9.892  | -6.513  | 0.00 | 0.00 | H |
| HETATM | 37 | H7  | 0.11 | 1 | -27.437 | 7.908  | -3.103  | 0.00 | 0.00 | H |
| HETATM | 38 | H19 | 0.11 | 1 | -35.133 | 1.833  | -1.805  | 0.00 | 0.00 | H |
| HETATM | 39 | H20 | 0.11 | 1 | -34.818 | 4.852  | -5.762  | 0.00 | 0.00 | H |
| HETATM | 40 | H21 | 0.11 | 1 | -33.531 | 3.716  | -1.777  | 0.00 | 0.00 | H |
| HETATM | 41 | H30 | 0.11 | 1 | -33.184 | 9.975  | -0.790  | 0.00 | 0.00 | H |
| HETATM | 42 | H42 | 0.11 | 1 | -31.506 | 10.320 | -10.533 | 0.00 | 0.00 | H |
| HETATM | 43 | H43 | 0.11 | 1 | -31.953 | 10.746 | -8.138  | 0.00 | 0.00 | H |
| HETATM | 44 | H44 | 0.11 | 1 | -36.039 | 9.400  | -8.662  | 0.00 | 0.00 | H |
| HETATM | 45 | H48 | 0.11 | 1 | -29.599 | 4.275  | -2.226  | 0.00 | 0.00 | H |
| HETATM | 46 | H50 | 0.14 | 1 | -36.773 | 0.706  | -3.033  | 0.00 | 0.00 | H |
| HETATM | 47 | H52 | 0.14 | 1 | -37.142 | 2.186  | -5.896  | 0.00 | 0.00 | H |
| HETATM | 48 | H54 | 0.14 | 1 | -35.074 | 12.477 | -2.376  | 0.00 | 0.00 | H |



CONNECT 4 28  
CONNECT 4 28  
CONNECT 4 28  
CONNECT 4 28  
CONNECT 4 38  
CONNECT 5 6  
CONNECT 5 6  
CONNECT 5 6  
CONNECT 5 6  
CONNECT 5 29  
CONNECT 5 29  
CONNECT 5 29  
CONNECT 5 29  
CONNECT 5 39  
CONNECT 6 5  
CONNECT 6 5  
CONNECT 6 5  
CONNECT 6 5  
CONNECT 6 7  
CONNECT 6 7  
CONNECT 6 7  
CONNECT 6 7  
CONNECT 6 54  
CONNECT 7 4  
CONNECT 7 4  
CONNECT 7 4  
CONNECT 7 4  
CONNECT 7 6  
CONNECT 7 6  
CONNECT 7 6  
CONNECT 7 6  
CONNECT 7 40  
CONNECT 8 25 54  
CONNECT 9 30  
CONNECT 9 30  
CONNECT 9 30  
CONNECT 9 30  
CONNECT 9 32  
CONNECT 9 32  
CONNECT 9 32  
CONNECT 9 32  
CONNECT 9 58  
CONNECT 10 30  
CONNECT 10 30  
CONNECT 10 30  
CONNECT 10 30  
CONNECT 10 31  
CONNECT 10 31  
CONNECT 10 31  
CONNECT 10 31  
CONNECT 10 55

CONNECT 11 31  
CONNECT 11 31  
CONNECT 11 31  
CONNECT 11 31  
CONNECT 11 32  
CONNECT 11 32  
CONNECT 11 32  
CONNECT 11 32  
CONNECT 11 41  
CONNECT 12 13  
CONNECT 12 13  
CONNECT 12 13  
CONNECT 12 13  
CONNECT 12 34  
CONNECT 12 34  
CONNECT 12 34  
CONNECT 12 34  
CONNECT 12 42  
CONNECT 13 12  
CONNECT 13 12  
CONNECT 13 12  
CONNECT 13 12  
CONNECT 13 14  
CONNECT 13 14  
CONNECT 13 14  
CONNECT 13 14  
CONNECT 13 43  
CONNECT 14 13  
CONNECT 14 13  
CONNECT 14 13  
CONNECT 14 13  
CONNECT 14 15  
CONNECT 14 15  
CONNECT 14 15  
CONNECT 14 15  
CONNECT 14 57  
CONNECT 15 14  
CONNECT 15 14  
CONNECT 15 14  
CONNECT 15 14  
CONNECT 15 33  
CONNECT 15 33  
CONNECT 15 33  
CONNECT 15 33  
CONNECT 15 44  
CONNECT 16 30 57  
CONNECT 17 28 46  
CONNECT 18 29 47  
CONNECT 19 32 48  
CONNECT 20 31 49  
CONNECT 21 26 50



CONECT 22 27 51  
CONECT 23 34 52  
CONECT 24 33 53  
CONECT 25 1  
CONECT 25 1  
CONECT 25 1  
CONECT 25 1  
CONECT 25 2  
CONECT 25 2  
CONECT 25 2  
CONECT 25 2  
CONECT 25 8  
CONECT 26 2  
CONECT 26 2  
CONECT 26 2  
CONECT 26 2  
CONECT 26 3  
CONECT 26 3  
CONECT 26 3  
CONECT 26 3  
CONECT 26 21  
CONECT 27 1  
CONECT 27 1  
CONECT 27 1  
CONECT 27 1  
CONECT 27 3  
CONECT 27 3  
CONECT 27 3  
CONECT 27 3  
CONECT 27 22  
CONECT 28 4  
CONECT 28 4  
CONECT 28 4  
CONECT 28 4  
CONECT 28 17  
CONECT 28 29  
CONECT 28 29  
CONECT 28 29  
CONECT 28 29  
CONECT 29 5  
CONECT 29 5  
CONECT 29 5  
CONECT 29 5  
CONECT 29 18  
CONECT 29 28  
CONECT 29 28  
CONECT 29 28  
CONECT 29 28  
CONECT 30 9  
CONECT 30 9  
CONECT 30 9

CONNECT 30 9  
CONNECT 30 10  
CONNECT 30 10  
CONNECT 30 10  
CONNECT 30 10  
CONNECT 30 16  
CONNECT 31 10  
CONNECT 31 10  
CONNECT 31 10  
CONNECT 31 10  
CONNECT 31 11  
CONNECT 31 11  
CONNECT 31 11  
CONNECT 31 11  
CONNECT 31 20  
CONNECT 32 9  
CONNECT 32 9  
CONNECT 32 9  
CONNECT 32 9  
CONNECT 32 11  
CONNECT 32 11  
CONNECT 32 11  
CONNECT 32 11  
CONNECT 32 19  
CONNECT 33 15  
CONNECT 33 15  
CONNECT 33 15  
CONNECT 33 15  
CONNECT 33 24  
CONNECT 33 34  
CONNECT 33 34  
CONNECT 33 34  
CONNECT 33 34  
CONNECT 34 12  
CONNECT 34 12  
CONNECT 34 12  
CONNECT 34 12  
CONNECT 34 23  
CONNECT 34 33  
CONNECT 34 33  
CONNECT 34 33  
CONNECT 34 33  
CONNECT 35 54  
CONNECT 36 57  
CONNECT 37 3  
CONNECT 38 4  
CONNECT 39 5  
CONNECT 40 7  
CONNECT 41 11  
CONNECT 42 12  
CONNECT 43 13

CONECT 44 15  
 CONECT 45 2  
 CONECT 46 17  
 CONECT 47 18  
 CONECT 48 19  
 CONECT 49 20  
 CONECT 50 21  
 CONECT 51 22  
 CONECT 52 23  
 CONECT 53 24  
 CONECT 54 6 8 35 56  
 CONECT 55 1 10 56 62  
 CONECT 56 54 55 60 63  
 CONECT 57 14 16 36 59  
 CONECT 58 9 59 64 66  
 CONECT 59 57 58 61 65  
 CONECT 60 56 67  
 CONECT 61 59 68  
 CONECT 62 55  
 CONECT 63 56  
 CONECT 64 58  
 CONECT 65 59  
 CONECT 66 58  
 CONECT 67 60  
 CONECT 68 61  
 END

**Procyanidin B3 compact rotamer:**

|        |    |     |     |   |        |         |        |      |      |   |
|--------|----|-----|-----|---|--------|---------|--------|------|------|---|
| HETATM | 1  | C1  | UNK | 1 | 38.055 | -20.522 | 33.292 | 0.00 | 0.00 | C |
| HETATM | 2  | C2  | UNK | 1 | 37.527 | -21.712 | 33.807 | 0.00 | 0.00 | C |
| HETATM | 3  | C3  | UNK | 1 | 36.987 | -22.695 | 32.962 | 0.00 | 0.00 | C |
| HETATM | 4  | C4  | UNK | 1 | 36.995 | -22.475 | 31.577 | 0.00 | 0.00 | C |
| HETATM | 5  | C5  | UNK | 1 | 37.527 | -21.292 | 31.059 | 0.00 | 0.00 | C |
| HETATM | 6  | C6  | UNK | 1 | 38.052 | -20.316 | 31.908 | 0.00 | 0.00 | C |
| HETATM | 7  | C8  | UNK | 1 | 38.325 | -21.171 | 36.004 | 0.00 | 0.00 | C |
| HETATM | 8  | C9  | UNK | 1 | 38.119 | -19.689 | 35.662 | 0.00 | 0.00 | C |
| HETATM | 9  | O11 | UNK | 1 | 38.898 | -18.849 | 36.520 | 0.00 | 0.00 | O |
| HETATM | 10 | O13 | UNK | 1 | 36.482 | -23.420 | 30.743 | 0.00 | 0.00 | O |
| HETATM | 11 | O15 | UNK | 1 | 38.568 | -19.161 | 31.407 | 0.00 | 0.00 | O |
| HETATM | 12 | C17 | UNK | 1 | 38.497 | -22.366 | 39.626 | 0.00 | 0.00 | C |
| HETATM | 13 | C18 | UNK | 1 | 37.166 | -22.267 | 40.028 | 0.00 | 0.00 | C |
| HETATM | 14 | C19 | UNK | 1 | 36.202 | -21.806 | 39.126 | 0.00 | 0.00 | C |
| HETATM | 15 | C20 | UNK | 1 | 36.580 | -21.450 | 37.828 | 0.00 | 0.00 | C |
| HETATM | 16 | C21 | UNK | 1 | 37.917 | -21.546 | 37.413 | 0.00 | 0.00 | C |
| HETATM | 17 | C22 | UNK | 1 | 38.870 | -22.008 | 38.330 | 0.00 | 0.00 | C |
| HETATM | 18 | O27 | UNK | 1 | 37.500 | -21.953 | 35.149 | 0.00 | 0.00 | O |
| HETATM | 19 | O28 | UNK | 1 | 36.831 | -22.623 | 41.297 | 0.00 | 0.00 | O |
| HETATM | 20 | O30 | UNK | 1 | 34.908 | -21.715 | 39.539 | 0.00 | 0.00 | O |
| HETATM | 21 | C32 | UNK | 1 | 35.338 | -23.760 | 34.606 | 0.00 | 0.00 | C |
| HETATM | 22 | C33 | UNK | 1 | 35.393 | -24.446 | 35.826 | 0.00 | 0.00 | C |



CONNECT 2 3 18  
CONNECT 3 2  
CONNECT 3 4  
CONNECT 3 4  
CONNECT 3 28  
CONNECT 4 3  
CONNECT 4 3  
CONNECT 4 5 10  
CONNECT 5 4  
CONNECT 5 6  
CONNECT 5 6  
CONNECT 5 43  
CONNECT 6 1  
CONNECT 6 5  
CONNECT 6 5  
CONNECT 6 11  
CONNECT 7 8 16 18 51  
CONNECT 8 7 9 42 44  
CONNECT 9 8 45  
CONNECT 10 4 46  
CONNECT 11 6 47  
CONNECT 12 13  
CONNECT 12 13  
CONNECT 12 17 48  
CONNECT 13 12  
CONNECT 13 12  
CONNECT 13 14 19  
CONNECT 14 13  
CONNECT 14 15  
CONNECT 14 15  
CONNECT 14 20  
CONNECT 15 14  
CONNECT 15 14  
CONNECT 15 16 49  
CONNECT 16 7 15  
CONNECT 16 17  
CONNECT 16 17  
CONNECT 17 12  
CONNECT 17 16  
CONNECT 17 16  
CONNECT 17 50  
CONNECT 18 2 7  
CONNECT 19 13 52  
CONNECT 20 14 53  
CONNECT 21 22  
CONNECT 21 22  
CONNECT 21 26 28  
CONNECT 22 21  
CONNECT 22 21  
CONNECT 22 23 39  
CONNECT 23 22

CONNECT 23 24  
CONNECT 23 24  
CONNECT 23 54  
CONNECT 24 23  
CONNECT 24 23  
CONNECT 24 25 31  
CONNECT 25 24  
CONNECT 25 26  
CONNECT 25 26  
CONNECT 25 55  
CONNECT 26 21  
CONNECT 26 25  
CONNECT 26 25  
CONNECT 26 32  
CONNECT 27 29 37 39 63  
CONNECT 28 3 21 29 66  
CONNECT 29 27 28 30 56  
CONNECT 30 29 57  
CONNECT 31 24 58  
CONNECT 32 26 59  
CONNECT 33 34  
CONNECT 33 34  
CONNECT 33 38 60  
CONNECT 34 33  
CONNECT 34 33  
CONNECT 34 35 40  
CONNECT 35 34  
CONNECT 35 36  
CONNECT 35 36  
CONNECT 35 41  
CONNECT 36 35  
CONNECT 36 35  
CONNECT 36 37 61  
CONNECT 37 27 36  
CONNECT 37 38  
CONNECT 37 38  
CONNECT 38 33  
CONNECT 38 37  
CONNECT 38 37  
CONNECT 38 62  
CONNECT 39 22 27  
CONNECT 40 34 64  
CONNECT 41 35 65  
CONNECT 42 1 8 67 68  
CONNECT 43 5  
CONNECT 44 8  
CONNECT 45 9  
CONNECT 46 10  
CONNECT 47 11  
CONNECT 48 12  
CONNECT 49 15

CONECT 50 17  
 CONECT 51 7  
 CONECT 52 19  
 CONECT 53 20  
 CONECT 54 23  
 CONECT 55 25  
 CONECT 56 29  
 CONECT 57 30  
 CONECT 58 31  
 CONECT 59 32  
 CONECT 60 33  
 CONECT 61 36  
 CONECT 62 38  
 CONECT 63 27  
 CONECT 64 40  
 CONECT 65 41  
 CONECT 66 28  
 CONECT 67 42  
 CONECT 68 42  
 END

**Procyanidin B3 extended rotamer:**

|        |    |     |     |   |        |         |        |      |      |   |
|--------|----|-----|-----|---|--------|---------|--------|------|------|---|
| HETATM | 1  | C1  | UNK | 1 | 38.055 | -20.522 | 33.292 | 0.00 | 0.00 | C |
| HETATM | 2  | C2  | UNK | 1 | 37.527 | -21.712 | 33.807 | 0.00 | 0.00 | C |
| HETATM | 3  | C3  | UNK | 1 | 36.987 | -22.695 | 32.962 | 0.00 | 0.00 | C |
| HETATM | 4  | C4  | UNK | 1 | 36.995 | -22.475 | 31.577 | 0.00 | 0.00 | C |
| HETATM | 5  | C5  | UNK | 1 | 37.527 | -21.292 | 31.059 | 0.00 | 0.00 | C |
| HETATM | 6  | C6  | UNK | 1 | 38.052 | -20.316 | 31.908 | 0.00 | 0.00 | C |
| HETATM | 7  | C8  | UNK | 1 | 38.325 | -21.171 | 36.004 | 0.00 | 0.00 | C |
| HETATM | 8  | C9  | UNK | 1 | 38.119 | -19.689 | 35.662 | 0.00 | 0.00 | C |
| HETATM | 9  | O11 | UNK | 1 | 38.898 | -18.849 | 36.520 | 0.00 | 0.00 | O |
| HETATM | 10 | O13 | UNK | 1 | 36.482 | -23.420 | 30.743 | 0.00 | 0.00 | O |
| HETATM | 11 | O15 | UNK | 1 | 38.568 | -19.161 | 31.407 | 0.00 | 0.00 | O |
| HETATM | 12 | C17 | UNK | 1 | 38.497 | -22.366 | 39.626 | 0.00 | 0.00 | C |
| HETATM | 13 | C18 | UNK | 1 | 37.166 | -22.267 | 40.028 | 0.00 | 0.00 | C |
| HETATM | 14 | C19 | UNK | 1 | 36.202 | -21.806 | 39.126 | 0.00 | 0.00 | C |
| HETATM | 15 | C20 | UNK | 1 | 36.580 | -21.450 | 37.828 | 0.00 | 0.00 | C |
| HETATM | 16 | C21 | UNK | 1 | 37.917 | -21.546 | 37.413 | 0.00 | 0.00 | C |
| HETATM | 17 | C22 | UNK | 1 | 38.870 | -22.008 | 38.330 | 0.00 | 0.00 | C |
| HETATM | 18 | O27 | UNK | 1 | 37.500 | -21.953 | 35.149 | 0.00 | 0.00 | O |
| HETATM | 19 | O28 | UNK | 1 | 36.831 | -22.623 | 41.297 | 0.00 | 0.00 | O |
| HETATM | 20 | O30 | UNK | 1 | 34.908 | -21.715 | 39.539 | 0.00 | 0.00 | O |
| HETATM | 21 | C32 | UNK | 1 | 37.341 | -25.170 | 33.511 | 0.00 | 0.00 | C |
| HETATM | 22 | C33 | UNK | 1 | 36.881 | -26.409 | 33.043 | 0.00 | 0.00 | C |
| HETATM | 23 | C34 | UNK | 1 | 37.745 | -27.501 | 32.960 | 0.00 | 0.00 | C |
| HETATM | 24 | C35 | UNK | 1 | 39.074 | -27.385 | 33.365 | 0.00 | 0.00 | C |
| HETATM | 25 | C36 | UNK | 1 | 39.532 | -26.165 | 33.857 | 0.00 | 0.00 | C |
| HETATM | 26 | C37 | UNK | 1 | 38.675 | -25.063 | 33.935 | 0.00 | 0.00 | C |
| HETATM | 27 | C40 | UNK | 1 | 34.624 | -25.709 | 33.192 | 0.00 | 0.00 | C |
| HETATM | 28 | C41 | UNK | 1 | 36.411 | -23.973 | 33.556 | 0.00 | 0.00 | C |





CONNECT 4 3  
CONNECT 4 5 10  
CONNECT 5 4  
CONNECT 5 6  
CONNECT 5 6  
CONNECT 5 43  
CONNECT 6 1  
CONNECT 6 5  
CONNECT 6 5  
CONNECT 6 11  
CONNECT 7 8 16 18 51  
CONNECT 8 7 9 42 44  
CONNECT 9 8 45  
CONNECT 10 4 46  
CONNECT 11 6 47  
CONNECT 12 13  
CONNECT 12 13  
CONNECT 12 17 48  
CONNECT 13 12  
CONNECT 13 12  
CONNECT 13 14 19  
CONNECT 14 13  
CONNECT 14 15  
CONNECT 14 15  
CONNECT 14 20  
CONNECT 15 14  
CONNECT 15 14  
CONNECT 15 16 49  
CONNECT 16 7 15  
CONNECT 16 17  
CONNECT 16 17  
CONNECT 17 12  
CONNECT 17 16  
CONNECT 17 16  
CONNECT 17 50  
CONNECT 18 2 7  
CONNECT 19 13 52  
CONNECT 20 14 53  
CONNECT 21 22  
CONNECT 21 22  
CONNECT 21 26 28  
CONNECT 22 21  
CONNECT 22 21  
CONNECT 22 23 39  
CONNECT 23 22  
CONNECT 23 24  
CONNECT 23 24  
CONNECT 23 54  
CONNECT 24 23  
CONNECT 24 23  
CONNECT 24 25 31

CONNECT 25 24  
CONNECT 25 26  
CONNECT 25 26  
CONNECT 25 55  
CONNECT 26 21  
CONNECT 26 25  
CONNECT 26 25  
CONNECT 26 32  
CONNECT 27 29 37 39 63  
CONNECT 28 3 21 29 66  
CONNECT 29 27 28 30 56  
CONNECT 30 29 57  
CONNECT 31 24 58  
CONNECT 32 26 59  
CONNECT 33 34  
CONNECT 33 34  
CONNECT 33 38 60  
CONNECT 34 33  
CONNECT 34 33  
CONNECT 34 35 40  
CONNECT 35 34  
CONNECT 35 36  
CONNECT 35 36  
CONNECT 35 41  
CONNECT 36 35  
CONNECT 36 35  
CONNECT 36 37 61  
CONNECT 37 27 36  
CONNECT 37 38  
CONNECT 37 38  
CONNECT 38 33  
CONNECT 38 37  
CONNECT 38 37  
CONNECT 38 62  
CONNECT 39 22 27  
CONNECT 40 34 64  
CONNECT 41 35 65  
CONNECT 42 1 8 67 68  
CONNECT 43 5  
CONNECT 44 8  
CONNECT 45 9  
CONNECT 46 10  
CONNECT 47 11  
CONNECT 48 12  
CONNECT 49 15  
CONNECT 50 17  
CONNECT 51 7  
CONNECT 52 19  
CONNECT 53 20  
CONNECT 54 23  
CONNECT 55 25

CONECT 56 29  
 CONECT 57 30  
 CONECT 58 31  
 CONECT 59 32  
 CONECT 60 33  
 CONECT 61 36  
 CONECT 62 38  
 CONECT 63 27  
 CONECT 64 40  
 CONECT 65 41  
 CONECT 66 28  
 CONECT 67 42  
 CONECT 68 42  
 END

**Procyanidin B4 compact rotamer**

|        |    |     |     |   |        |        |        |      |      |   |
|--------|----|-----|-----|---|--------|--------|--------|------|------|---|
| HETATM | 1  | C1  | UNK | 1 | -8.250 | 4.304  | 16.216 | 0.00 | 0.00 | C |
| HETATM | 2  | C2  | UNK | 1 | -7.179 | 5.118  | 15.823 | 0.00 | 0.00 | C |
| HETATM | 3  | C3  | UNK | 1 | -5.877 | 4.886  | 16.295 | 0.00 | 0.00 | C |
| HETATM | 4  | C4  | UNK | 1 | -5.656 | 3.811  | 17.168 | 0.00 | 0.00 | C |
| HETATM | 5  | C5  | UNK | 1 | -6.720 | 2.995  | 17.559 | 0.00 | 0.00 | C |
| HETATM | 6  | C6  | UNK | 1 | -8.011 | 3.237  | 17.090 | 0.00 | 0.00 | C |
| HETATM | 7  | C8  | UNK | 1 | -8.536 | 6.187  | 14.167 | 0.00 | 0.00 | C |
| HETATM | 8  | C9  | UNK | 1 | -9.777 | 5.953  | 15.041 | 0.00 | 0.00 | C |
| HETATM | 9  | O11 | UNK | 1 | -9.916 | 6.952  | 16.059 | 0.00 | 0.00 | O |
| HETATM | 10 | O13 | UNK | 1 | -4.399 | 3.566  | 17.630 | 0.00 | 0.00 | O |
| HETATM | 11 | O15 | UNK | 1 | -9.051 | 2.444  | 17.468 | 0.00 | 0.00 | O |
| HETATM | 12 | C17 | UNK | 1 | -8.850 | 8.717  | 11.329 | 0.00 | 0.00 | C |
| HETATM | 13 | C18 | UNK | 1 | -8.508 | 9.912  | 11.960 | 0.00 | 0.00 | C |
| HETATM | 14 | C19 | UNK | 1 | -8.177 | 9.908  | 13.318 | 0.00 | 0.00 | C |
| HETATM | 15 | C20 | UNK | 1 | -8.190 | 8.706  | 14.032 | 0.00 | 0.00 | C |
| HETATM | 16 | C21 | UNK | 1 | -8.535 | 7.498  | 13.408 | 0.00 | 0.00 | C |
| HETATM | 17 | C22 | UNK | 1 | -8.864 | 7.520  | 12.046 | 0.00 | 0.00 | C |
| HETATM | 18 | O27 | UNK | 1 | -7.369 | 6.170  | 14.979 | 0.00 | 0.00 | O |
| HETATM | 19 | O28 | UNK | 1 | -8.503 | 11.063 | 11.235 | 0.00 | 0.00 | O |
| HETATM | 20 | O30 | UNK | 1 | -7.848 | 11.086 | 13.915 | 0.00 | 0.00 | O |
| HETATM | 21 | C32 | UNK | 1 | -4.931 | 7.262  | 16.147 | 0.00 | 0.00 | C |
| HETATM | 22 | C33 | UNK | 1 | -4.686 | 8.222  | 15.157 | 0.00 | 0.00 | C |
| HETATM | 23 | C34 | UNK | 1 | -4.904 | 9.575  | 15.413 | 0.00 | 0.00 | C |
| HETATM | 24 | C35 | UNK | 1 | -5.348 | 9.999  | 16.663 | 0.00 | 0.00 | C |
| HETATM | 25 | C36 | UNK | 1 | -5.567 | 9.054  | 17.665 | 0.00 | 0.00 | C |
| HETATM | 26 | C37 | UNK | 1 | -5.357 | 7.694  | 17.414 | 0.00 | 0.00 | C |
| HETATM | 27 | C40 | UNK | 1 | -3.555 | 6.646  | 13.793 | 0.00 | 0.00 | C |
| HETATM | 28 | C41 | UNK | 1 | -4.733 | 5.788  | 15.851 | 0.00 | 0.00 | C |
| HETATM | 29 | C42 | UNK | 1 | -4.444 | 5.529  | 14.353 | 0.00 | 0.00 | C |
| HETATM | 30 | O44 | UNK | 1 | -3.762 | 4.273  | 14.212 | 0.00 | 0.00 | O |
| HETATM | 31 | O46 | UNK | 1 | -5.550 | 11.328 | 16.870 | 0.00 | 0.00 | O |
| HETATM | 32 | O48 | UNK | 1 | -5.564 | 6.778  | 18.398 | 0.00 | 0.00 | O |
| HETATM | 33 | C50 | UNK | 1 | -1.756 | 5.942  | 10.497 | 0.00 | 0.00 | C |
| HETATM | 34 | C51 | UNK | 1 | -2.768 | 6.158  | 9.563  | 0.00 | 0.00 | C |

|         |    |         |    |         |        |        |      |      |   |
|---------|----|---------|----|---------|--------|--------|------|------|---|
| HETATM  | 35 | C52 UNK | 1  | -4.043  | 6.535  | 9.997  | 0.00 | 0.00 | C |
| HETATM  | 36 | C53 UNK | 1  | -4.293  | 6.691  | 11.363 | 0.00 | 0.00 | C |
| HETATM  | 37 | C54 UNK | 1  | -3.280  | 6.477  | 12.311 | 0.00 | 0.00 | C |
| HETATM  | 38 | C55 UNK | 1  | -2.009  | 6.099  | 11.860 | 0.00 | 0.00 | C |
| HETATM  | 39 | O60 UNK | 1  | -4.232  | 7.890  | 13.919 | 0.00 | 0.00 | O |
| HETATM  | 40 | O61 UNK | 1  | -2.491  | 5.997  | 8.241  | 0.00 | 0.00 | O |
| HETATM  | 41 | O63 UNK | 1  | -5.018  | 6.742  | 9.070  | 0.00 | 0.00 | O |
| HETATM  | 42 | C66 UNK | 1  | -9.645  | 4.581  | 15.710 | 0.00 | 0.00 | C |
| HETATM  | 43 | H7 UNK  | 1  | -6.538  | 2.152  | 18.246 | 0.00 | 0.00 | H |
| HETATM  | 44 | H10 UNK | 1  | -10.690 | 5.953  | 14.400 | 0.00 | 0.00 | H |
| HETATM  | 45 | H12 UNK | 1  | -10.425 | 7.677  | 15.702 | 0.00 | 0.00 | H |
| HETATM  | 46 | H14 UNK | 1  | -4.338  | 2.804  | 18.232 | 0.00 | 0.00 | H |
| HETATM  | 47 | H16 UNK | 1  | -8.800  | 1.727  | 18.076 | 0.00 | 0.00 | H |
| HETATM  | 48 | H23 UNK | 1  | -9.110  | 8.718  | 10.257 | 0.00 | 0.00 | H |
| HETATM  | 49 | H24 UNK | 1  | -7.922  | 8.707  | 15.102 | 0.00 | 0.00 | H |
| HETATM  | 50 | H25 UNK | 1  | -9.137  | 6.586  | 11.526 | 0.00 | 0.00 | H |
| HETATM  | 51 | H26 UNK | 1  | -8.462  | 5.358  | 13.427 | 0.00 | 0.00 | H |
| HETATM  | 52 | H29 UNK | 1  | -8.247  | 11.824 | 11.785 | 0.00 | 0.00 | H |
| HETATM  | 53 | H31 UNK | 1  | -7.643  | 10.999 | 14.863 | 0.00 | 0.00 | H |
| HETATM  | 54 | H38 UNK | 1  | -4.718  | 10.318 | 14.619 | 0.00 | 0.00 | H |
| HETATM  | 55 | H39 UNK | 1  | -5.909  | 9.382  | 18.660 | 0.00 | 0.00 | H |
| HETATM  | 56 | H43 UNK | 1  | -5.390  | 5.509  | 13.767 | 0.00 | 0.00 | H |
| HETATM  | 57 | H45 UNK | 1  | -4.415  | 3.578  | 14.166 | 0.00 | 0.00 | H |
| HETATM  | 58 | H47 UNK | 1  | -5.857  | 11.538 | 17.769 | 0.00 | 0.00 | H |
| HETATM  | 59 | H49 UNK | 1  | -5.873  | 7.159  | 19.239 | 0.00 | 0.00 | H |
| HETATM  | 60 | H56 UNK | 1  | -0.750  | 5.643  | 10.156 | 0.00 | 0.00 | H |
| HETATM  | 61 | H57 UNK | 1  | -5.301  | 6.989  | 11.699 | 0.00 | 0.00 | H |
| HETATM  | 62 | H58 UNK | 1  | -1.195  | 5.920  | 12.584 | 0.00 | 0.00 | H |
| HETATM  | 63 | H59 UNK | 1  | -2.594  | 6.686  | 14.354 | 0.00 | 0.00 | H |
| HETATM  | 64 | H62 UNK | 1  | -3.275  | 6.176  | 7.691  | 0.00 | 0.00 | H |
| HETATM  | 65 | H64 UNK | 1  | -5.873  | 7.005  | 9.455  | 0.00 | 0.00 | H |
| HETATM  | 66 | H65 UNK | 1  | -3.812  | 5.506  | 16.415 | 0.00 | 0.00 | H |
| HETATM  | 67 | H67 UNK | 1  | -9.906  | 3.789  | 14.970 | 0.00 | 0.00 | H |
| HETATM  | 68 | H68 UNK | 1  | -10.384 | 4.498  | 16.538 | 0.00 | 0.00 | H |
| CONNECT | 1  | 2       |    |         |        |        |      |      |   |
| CONNECT | 1  | 2       |    |         |        |        |      |      |   |
| CONNECT | 1  | 6       | 42 |         |        |        |      |      |   |
| CONNECT | 2  | 1       |    |         |        |        |      |      |   |
| CONNECT | 2  | 1       |    |         |        |        |      |      |   |
| CONNECT | 2  | 3       | 18 |         |        |        |      |      |   |
| CONNECT | 3  | 2       |    |         |        |        |      |      |   |
| CONNECT | 3  | 4       |    |         |        |        |      |      |   |
| CONNECT | 3  | 4       |    |         |        |        |      |      |   |
| CONNECT | 3  | 28      |    |         |        |        |      |      |   |
| CONNECT | 4  | 3       |    |         |        |        |      |      |   |
| CONNECT | 4  | 3       |    |         |        |        |      |      |   |
| CONNECT | 4  | 5       | 10 |         |        |        |      |      |   |
| CONNECT | 5  | 4       |    |         |        |        |      |      |   |
| CONNECT | 5  | 6       |    |         |        |        |      |      |   |
| CONNECT | 5  | 6       |    |         |        |        |      |      |   |
| CONNECT | 5  | 43      |    |         |        |        |      |      |   |

CONNECT 6 1  
CONNECT 6 5  
CONNECT 6 5  
CONNECT 6 11  
CONNECT 7 8 16 18 51  
CONNECT 8 7 9 42 44  
CONNECT 9 8 45  
CONNECT 10 4 46  
CONNECT 11 6 47  
CONNECT 12 13  
CONNECT 12 13  
CONNECT 12 17 48  
CONNECT 13 12  
CONNECT 13 12  
CONNECT 13 14 19  
CONNECT 14 13  
CONNECT 14 15  
CONNECT 14 15  
CONNECT 14 20  
CONNECT 15 14  
CONNECT 15 14  
CONNECT 15 16 49  
CONNECT 16 7 15  
CONNECT 16 17  
CONNECT 16 17  
CONNECT 17 12  
CONNECT 17 16  
CONNECT 17 16  
CONNECT 17 50  
CONNECT 18 2 7  
CONNECT 19 13 52  
CONNECT 20 14 53  
CONNECT 21 22  
CONNECT 21 22  
CONNECT 21 26 28  
CONNECT 22 21  
CONNECT 22 21  
CONNECT 22 23 39  
CONNECT 23 22  
CONNECT 23 24  
CONNECT 23 24  
CONNECT 23 54  
CONNECT 24 23  
CONNECT 24 23  
CONNECT 24 25 31  
CONNECT 25 24  
CONNECT 25 26  
CONNECT 25 26  
CONNECT 25 55  
CONNECT 26 21  
CONNECT 26 25

CONNECT 26 25  
CONNECT 26 32  
CONNECT 27 29 37 39 63  
CONNECT 28 3 21 29 66  
CONNECT 29 27 28 30 56  
CONNECT 30 29 57  
CONNECT 31 24 58  
CONNECT 32 26 59  
CONNECT 33 34  
CONNECT 33 34  
CONNECT 33 38 60  
CONNECT 34 33  
CONNECT 34 33  
CONNECT 34 35 40  
CONNECT 35 34  
CONNECT 35 36  
CONNECT 35 36  
CONNECT 35 41  
CONNECT 36 35  
CONNECT 36 35  
CONNECT 36 37 61  
CONNECT 37 27 36  
CONNECT 37 38  
CONNECT 37 38  
CONNECT 38 33  
CONNECT 38 37  
CONNECT 38 37  
CONNECT 38 62  
CONNECT 39 22 27  
CONNECT 40 34 64  
CONNECT 41 35 65  
CONNECT 42 1 8 67 68  
CONNECT 43 5  
CONNECT 44 8  
CONNECT 45 9  
CONNECT 46 10  
CONNECT 47 11  
CONNECT 48 12  
CONNECT 49 15  
CONNECT 50 17  
CONNECT 51 7  
CONNECT 52 19  
CONNECT 53 20  
CONNECT 54 23  
CONNECT 55 25  
CONNECT 56 29  
CONNECT 57 30  
CONNECT 58 31  
CONNECT 59 32  
CONNECT 60 33  
CONNECT 61 36

CONNECT 62 38  
CONNECT 63 27  
CONNECT 64 40  
CONNECT 65 41  
CONNECT 66 28  
CONNECT 67 42  
CONNECT 68 42  
END

**Procyanidin B4 extended rotamer:**

|        |    |     |     |   |        |        |         |      |      |   |
|--------|----|-----|-----|---|--------|--------|---------|------|------|---|
| HETATM | 1  | C1  | UNK | 1 | 13.943 | 51.505 | -30.872 | 0.00 | 0.00 | C |
| HETATM | 2  | C2  | UNK | 1 | 14.017 | 50.153 | -30.514 | 0.00 | 0.00 | C |
| HETATM | 3  | C3  | UNK | 1 | 13.016 | 49.246 | -30.903 | 0.00 | 0.00 | C |
| HETATM | 4  | C4  | UNK | 1 | 11.938 | 49.714 | -31.668 | 0.00 | 0.00 | C |
| HETATM | 5  | C5  | UNK | 1 | 11.868 | 51.059 | -32.034 | 0.00 | 0.00 | C |
| HETATM | 6  | C6  | UNK | 1 | 12.861 | 51.955 | -31.638 | 0.00 | 0.00 | C |
| HETATM | 7  | C8  | UNK | 1 | 16.218 | 50.464 | -29.586 | 0.00 | 0.00 | C |
| HETATM | 8  | C9  | UNK | 1 | 15.833 | 51.914 | -29.252 | 0.00 | 0.00 | C |
| HETATM | 9  | O11 | UNK | 1 | 15.062 | 51.999 | -28.048 | 0.00 | 0.00 | O |
| HETATM | 10 | O13 | UNK | 1 | 10.961 | 48.848 | -32.054 | 0.00 | 0.00 | O |
| HETATM | 11 | O15 | UNK | 1 | 12.795 | 53.269 | -31.988 | 0.00 | 0.00 | O |
| HETATM | 12 | C17 | UNK | 1 | 19.266 | 49.287 | -27.619 | 0.00 | 0.00 | C |
| HETATM | 13 | C18 | UNK | 1 | 18.685 | 48.606 | -26.550 | 0.00 | 0.00 | C |
| HETATM | 14 | C19 | UNK | 1 | 17.293 | 48.524 | -26.456 | 0.00 | 0.00 | C |
| HETATM | 15 | C20 | UNK | 1 | 16.494 | 49.124 | -27.434 | 0.00 | 0.00 | C |
| HETATM | 16 | C21 | UNK | 1 | 17.068 | 49.811 | -28.514 | 0.00 | 0.00 | C |
| HETATM | 17 | C22 | UNK | 1 | 18.465 | 49.883 | -28.593 | 0.00 | 0.00 | C |
| HETATM | 18 | O27 | UNK | 1 | 15.046 | 49.674 | -29.757 | 0.00 | 0.00 | O |
| HETATM | 19 | O28 | UNK | 1 | 19.492 | 48.034 | -25.615 | 0.00 | 0.00 | O |
| HETATM | 20 | O30 | UNK | 1 | 16.745 | 47.854 | -25.405 | 0.00 | 0.00 | O |
| HETATM | 21 | C32 | UNK | 1 | 12.962 | 46.781 | -31.626 | 0.00 | 0.00 | C |
| HETATM | 22 | C33 | UNK | 1 | 12.115 | 45.673 | -31.495 | 0.00 | 0.00 | C |
| HETATM | 23 | C34 | UNK | 1 | 11.960 | 44.770 | -32.548 | 0.00 | 0.00 | C |
| HETATM | 24 | C35 | UNK | 1 | 12.667 | 44.942 | -33.737 | 0.00 | 0.00 | C |
| HETATM | 25 | C36 | UNK | 1 | 13.537 | 46.023 | -33.863 | 0.00 | 0.00 | C |
| HETATM | 26 | C37 | UNK | 1 | 13.690 | 46.938 | -32.817 | 0.00 | 0.00 | C |
| HETATM | 27 | C40 | UNK | 1 | 11.937 | 46.004 | -29.160 | 0.00 | 0.00 | C |
| HETATM | 28 | C41 | UNK | 1 | 13.095 | 47.781 | -30.495 | 0.00 | 0.00 | C |
| HETATM | 29 | C42 | UNK | 1 | 12.066 | 47.517 | -29.373 | 0.00 | 0.00 | C |
| HETATM | 30 | O44 | UNK | 1 | 12.516 | 48.125 | -28.153 | 0.00 | 0.00 | O |
| HETATM | 31 | O46 | UNK | 1 | 12.543 | 44.076 | -34.778 | 0.00 | 0.00 | O |
| HETATM | 32 | O48 | UNK | 1 | 14.549 | 47.986 | -32.944 | 0.00 | 0.00 | O |
| HETATM | 33 | C50 | UNK | 1 | 10.555 | 44.766 | -25.822 | 0.00 | 0.00 | C |
| HETATM | 34 | C51 | UNK | 1 | 9.184  | 44.964 | -25.982 | 0.00 | 0.00 | C |
| HETATM | 35 | C52 | UNK | 1 | 8.697  | 45.502 | -27.176 | 0.00 | 0.00 | C |
| HETATM | 36 | C53 | UNK | 1 | 9.586  | 45.837 | -28.202 | 0.00 | 0.00 | C |
| HETATM | 37 | C54 | UNK | 1 | 10.967 | 45.641 | -28.052 | 0.00 | 0.00 | C |
| HETATM | 38 | C55 | UNK | 1 | 11.439 | 45.102 | -26.848 | 0.00 | 0.00 | C |
| HETATM | 39 | O60 | UNK | 1 | 11.422 | 45.421 | -30.351 | 0.00 | 0.00 | O |
| HETATM | 40 | O61 | UNK | 1 | 8.346  | 44.627 | -24.965 | 0.00 | 0.00 | O |

|        |    |         |    |        |        |         |      |      |   |
|--------|----|---------|----|--------|--------|---------|------|------|---|
| HETATM | 41 | O63 UNK | 1  | 7.355  | 45.688 | -27.311 | 0.00 | 0.00 | O |
| HETATM | 42 | C66 UNK | 1  | 15.006 | 52.472 | -30.412 | 0.00 | 0.00 | C |
| HETATM | 43 | H7 UNK  | 1  | 11.018 | 51.418 | -32.638 | 0.00 | 0.00 | H |
| HETATM | 44 | H10 UNK | 1  | 16.756 | 52.530 | -29.142 | 0.00 | 0.00 | H |
| HETATM | 45 | H12 UNK | 1  | 15.663 | 52.020 | -27.306 | 0.00 | 0.00 | H |
| HETATM | 46 | H14 UNK | 1  | 10.260 | 49.253 | -32.594 | 0.00 | 0.00 | H |
| HETATM | 47 | H16 UNK | 1  | 12.012 | 53.496 | -32.520 | 0.00 | 0.00 | H |
| HETATM | 48 | H23 UNK | 1  | 20.365 | 49.354 | -27.694 | 0.00 | 0.00 | H |
| HETATM | 49 | H24 UNK | 1  | 15.396 | 49.056 | -27.352 | 0.00 | 0.00 | H |
| HETATM | 50 | H25 UNK | 1  | 18.946 | 50.418 | -29.431 | 0.00 | 0.00 | H |
| HETATM | 51 | H26 UNK | 1  | 16.792 | 50.456 | -30.541 | 0.00 | 0.00 | H |
| HETATM | 52 | H29 UNK | 1  | 18.970 | 47.590 | -24.923 | 0.00 | 0.00 | H |
| HETATM | 53 | H31 UNK | 1  | 15.772 | 47.839 | -25.417 | 0.00 | 0.00 | H |
| HETATM | 54 | H38 UNK | 1  | 11.281 | 43.910 | -32.426 | 0.00 | 0.00 | H |
| HETATM | 55 | H39 UNK | 1  | 14.104 | 46.151 | -34.800 | 0.00 | 0.00 | H |
| HETATM | 56 | H43 UNK | 1  | 11.069 | 47.926 | -29.652 | 0.00 | 0.00 | H |
| HETATM | 57 | H45 UNK | 1  | 12.270 | 49.048 | -28.166 | 0.00 | 0.00 | H |
| HETATM | 58 | H47 UNK | 1  | 11.918 | 43.350 | -34.606 | 0.00 | 0.00 | H |
| HETATM | 59 | H49 UNK | 1  | 15.003 | 48.026 | -33.803 | 0.00 | 0.00 | H |
| HETATM | 60 | H56 UNK | 1  | 10.942 | 44.342 | -24.879 | 0.00 | 0.00 | H |
| HETATM | 61 | H57 UNK | 1  | 9.196  | 46.262 | -29.142 | 0.00 | 0.00 | H |
| HETATM | 62 | H58 UNK | 1  | 12.521 | 44.940 | -26.700 | 0.00 | 0.00 | H |
| HETATM | 63 | H59 UNK | 1  | 12.936 | 45.568 | -28.934 | 0.00 | 0.00 | H |
| HETATM | 64 | H62 UNK | 1  | 7.418  | 44.812 | -25.196 | 0.00 | 0.00 | H |
| HETATM | 65 | H64 UNK | 1  | 7.097  | 46.065 | -28.171 | 0.00 | 0.00 | H |
| HETATM | 66 | H65 UNK | 1  | 14.105 | 47.583 | -30.064 | 0.00 | 0.00 | H |
| HETATM | 67 | H67 UNK | 1  | 15.678 | 52.689 | -31.274 | 0.00 | 0.00 | H |
| HETATM | 68 | H68 UNK | 1  | 14.551 | 53.442 | -30.108 | 0.00 | 0.00 | H |
| CONECT | 1  | 2       |    |        |        |         |      |      |   |
| CONECT | 1  | 2       |    |        |        |         |      |      |   |
| CONECT | 1  | 6       | 42 |        |        |         |      |      |   |
| CONECT | 2  | 1       |    |        |        |         |      |      |   |
| CONECT | 2  | 1       |    |        |        |         |      |      |   |
| CONECT | 2  | 3       | 18 |        |        |         |      |      |   |
| CONECT | 3  | 2       |    |        |        |         |      |      |   |
| CONECT | 3  | 4       |    |        |        |         |      |      |   |
| CONECT | 3  | 4       |    |        |        |         |      |      |   |
| CONECT | 3  | 28      |    |        |        |         |      |      |   |
| CONECT | 4  | 3       |    |        |        |         |      |      |   |
| CONECT | 4  | 3       |    |        |        |         |      |      |   |
| CONECT | 4  | 5       | 10 |        |        |         |      |      |   |
| CONECT | 5  | 4       |    |        |        |         |      |      |   |
| CONECT | 5  | 6       |    |        |        |         |      |      |   |
| CONECT | 5  | 6       |    |        |        |         |      |      |   |
| CONECT | 5  | 43      |    |        |        |         |      |      |   |
| CONECT | 6  | 1       |    |        |        |         |      |      |   |
| CONECT | 6  | 5       |    |        |        |         |      |      |   |
| CONECT | 6  | 5       |    |        |        |         |      |      |   |
| CONECT | 6  | 11      |    |        |        |         |      |      |   |
| CONECT | 7  | 8       | 16 | 18     | 51     |         |      |      |   |
| CONECT | 8  | 7       | 9  | 42     | 44     |         |      |      |   |



CONNECT 9 8 45  
CONNECT 10 4 46  
CONNECT 11 6 47  
CONNECT 12 13  
CONNECT 12 13  
CONNECT 12 17 48  
CONNECT 13 12  
CONNECT 13 12  
CONNECT 13 14 19  
CONNECT 14 13  
CONNECT 14 15  
CONNECT 14 15  
CONNECT 14 20  
CONNECT 15 14  
CONNECT 15 14  
CONNECT 15 16 49  
CONNECT 16 7 15  
CONNECT 16 17  
CONNECT 16 17  
CONNECT 17 12  
CONNECT 17 16  
CONNECT 17 16  
CONNECT 17 50  
CONNECT 18 2 7  
CONNECT 19 13 52  
CONNECT 20 14 53  
CONNECT 21 22  
CONNECT 21 22  
CONNECT 21 26 28  
CONNECT 22 21  
CONNECT 22 21  
CONNECT 22 23 39  
CONNECT 23 22  
CONNECT 23 24  
CONNECT 23 24  
CONNECT 23 54  
CONNECT 24 23  
CONNECT 24 23  
CONNECT 24 25 31  
CONNECT 25 24  
CONNECT 25 26  
CONNECT 25 26  
CONNECT 25 55  
CONNECT 26 21  
CONNECT 26 25  
CONNECT 26 25  
CONNECT 26 32  
CONNECT 27 29 37 39 63  
CONNECT 28 3 21 29 66  
CONNECT 29 27 28 30 56  
CONNECT 30 29 57

CONNECT 31 24 58  
CONNECT 32 26 59  
CONNECT 33 34  
CONNECT 33 34  
CONNECT 33 38 60  
CONNECT 34 33  
CONNECT 34 33  
CONNECT 34 35 40  
CONNECT 35 34  
CONNECT 35 36  
CONNECT 35 36  
CONNECT 35 41  
CONNECT 36 35  
CONNECT 36 35  
CONNECT 36 37 61  
CONNECT 37 27 36  
CONNECT 37 38  
CONNECT 37 38  
CONNECT 38 33  
CONNECT 38 37  
CONNECT 38 37  
CONNECT 38 62  
CONNECT 39 22 27  
CONNECT 40 34 64  
CONNECT 41 35 65  
CONNECT 42 1 8 67 68  
CONNECT 43 5  
CONNECT 44 8  
CONNECT 45 9  
CONNECT 46 10  
CONNECT 47 11  
CONNECT 48 12  
CONNECT 49 15  
CONNECT 50 17  
CONNECT 51 7  
CONNECT 52 19  
CONNECT 53 20  
CONNECT 54 23  
CONNECT 55 25  
CONNECT 56 29  
CONNECT 57 30  
CONNECT 58 31  
CONNECT 59 32  
CONNECT 60 33  
CONNECT 61 36  
CONNECT 62 38  
CONNECT 63 27  
CONNECT 64 40  
CONNECT 65 41  
CONNECT 66 28  
CONNECT 67 42

CONECT 68 42  
END

**PDB coordinates for 6 Histatin conformers:**

**Histatin conformer 1:**

|      |    |     |     |   |        |        |        |      |      |         |
|------|----|-----|-----|---|--------|--------|--------|------|------|---------|
| ATOM | 1  | N   | ASP | 1 | -0.753 | -1.254 | -0.000 | 1.00 | 1.00 | TAG N1+ |
| ATOM | 2  | CA  | ASP | 1 | 0.000  | 0.000  | 0.000  | 1.00 | 1.00 | TAG C   |
| ATOM | 3  | C   | ASP | 1 | -0.977 | 1.136  | 0.278  | 1.00 | 1.00 | TAG C   |
| ATOM | 4  | O   | ASP | 1 | -0.823 | 1.876  | 1.260  | 1.00 | 1.00 | TAG O   |
| ATOM | 5  | CB  | ASP | 1 | 0.960  | 0.376  | -1.135 | 1.00 | 1.00 | TAG C   |
| ATOM | 6  | CG  | ASP | 1 | 1.770  | 1.663  | -0.847 | 1.00 | 1.00 | TAG C   |
| ATOM | 7  | OD1 | ASP | 1 | 1.890  | 2.102  | 0.330  | 1.00 | 1.00 | TAG O   |
| ATOM | 8  | OD2 | ASP | 1 | 2.303  | 2.244  | -1.824 | 1.00 | 1.00 | TAG O   |
| ATOM | 9  | 1H  | ASP | 1 | -0.117 | -2.025 | -0.000 | 1.00 | 1.00 | TAG H   |
| ATOM | 10 | 2H  | ASP | 1 | -1.329 | -1.298 | 0.816  | 1.00 | 1.00 | TAG H   |
| ATOM | 11 | 3H  | ASP | 1 | -1.329 | -1.298 | -0.816 | 1.00 | 1.00 | TAG H   |
| ATOM | 12 | HA  | ASP | 1 | 0.619  | -0.185 | 0.890  | 1.00 | 1.00 | TAG H   |
| ATOM | 13 | 1HB | ASP | 1 | 1.657  | -0.458 | -1.309 | 1.00 | 1.00 | TAG H   |
| ATOM | 14 | 2HB | ASP | 1 | 0.385  | 0.512  | -2.063 | 1.00 | 1.00 | TAG H   |
| ATOM | 15 | H01 | ASP | 1 | 2.345  | 3.187  | -1.652 | 1.00 | 1.00 | TAG H   |
| ATOM | 16 | N   | SER | 2 | -1.967 | 1.311  | -0.528 | 1.00 | 1.00 | TAG N   |
| ATOM | 17 | CA  | SER | 2 | -2.992 | 2.337  | -0.341 | 1.00 | 1.00 | TAG C   |
| ATOM | 18 | C   | SER | 2 | -4.416 | 1.801  | -0.329 | 1.00 | 1.00 | TAG C   |
| ATOM | 19 | O   | SER | 2 | -5.328 | 2.145  | 0.408  | 1.00 | 1.00 | TAG O   |
| ATOM | 20 | CB  | SER | 2 | -2.874 | 3.386  | -1.449 | 1.00 | 1.00 | TAG C   |
| ATOM | 21 | OG  | SER | 2 | -3.946 | 4.308  | -1.377 | 1.00 | 1.00 | TAG O   |
| ATOM | 22 | H   | SER | 2 | -2.106 | 0.753  | -1.346 | 1.00 | 1.00 | TAG H   |
| ATOM | 23 | HA  | SER | 2 | -2.807 | 2.770  | 0.653  | 1.00 | 1.00 | TAG H   |
| ATOM | 24 | 1HB | SER | 2 | -1.917 | 3.920  | -1.357 | 1.00 | 1.00 | TAG H   |
| ATOM | 25 | 2HB | SER | 2 | -2.873 | 2.892  | -2.432 | 1.00 | 1.00 | TAG H   |
| ATOM | 26 | HG  | SER | 2 | -3.853 | 4.986  | -2.106 | 1.00 | 1.00 | TAG H   |
| ATOM | 27 | N   | HIS | 3 | -4.661 | 0.820  | -1.300 | 1.00 | 0.00 | TAG N   |
| ATOM | 28 | CA  | HIS | 3 | -5.959 | 0.168  | -1.448 | 1.00 | 0.00 | TAG C   |
| ATOM | 29 | C   | HIS | 3 | -6.059 | -1.049 | -0.561 | 1.00 | 0.00 | TAG C   |
| ATOM | 30 | O   | HIS | 3 | -6.895 | -1.115 | 0.383  | 1.00 | 0.00 | TAG O   |
| ATOM | 31 | CB  | HIS | 3 | -6.074 | -0.235 | -2.927 | 1.00 | 0.00 | TAG C   |
| ATOM | 32 | CG  | HIS | 3 | -6.002 | 0.948  | -3.848 | 1.00 | 0.00 | TAG C   |
| ATOM | 33 | CD2 | HIS | 3 | -4.928 | 1.173  | -4.698 | 1.00 | 0.00 | TAG C   |
| ATOM | 34 | ND1 | HIS | 3 | -6.968 | 1.944  | -3.973 | 1.00 | 0.00 | TAG N   |
| ATOM | 35 | CE1 | HIS | 3 | -6.384 | 2.716  | -4.908 | 1.00 | 0.00 | TAG C   |
| ATOM | 36 | NE2 | HIS | 3 | -5.173 | 2.328  | -5.394 | 1.00 | 0.00 | TAG N   |
| ATOM | 37 | H   | HIS | 3 | -3.919 | 0.556  | -1.913 | 1.00 | 0.00 | TAG H   |
| ATOM | 38 | HA  | HIS | 3 | -6.730 | 0.877  | -1.100 | 1.00 | 0.00 | TAG H   |
| ATOM | 39 | 2HB | HIS | 3 | -7.028 | -0.764 | -3.125 | 1.00 | 0.00 | TAG H   |
| ATOM | 40 | 3HB | HIS | 3 | -5.276 | -0.945 | -3.230 | 1.00 | 0.00 | TAG H   |
| ATOM | 41 | 2HD | HIS | 3 | -4.058 | 0.527  | -4.774 | 1.00 | 0.00 | TAG H   |
| ATOM | 42 | 1HE | HIS | 3 | -6.913 | 3.604  | -5.227 | 1.00 | 0.00 | TAG H   |
| ATOM | 43 | 2HE | HIS | 3 | -4.582 | 2.783  | -6.104 | 1.00 | 0.00 | TAG H   |
| ATOM | 44 | N   | ALA | 4 | -5.202 | -2.035 | -0.778 | 1.00 | 1.00 | TAG N   |

|      |    |     |     |   |        |        |        |      |      |     |     |
|------|----|-----|-----|---|--------|--------|--------|------|------|-----|-----|
| ATOM | 45 | CA  | ALA | 4 | -5.192 | -3.266 | -0.011 | 1.00 | 1.00 | TAG | C   |
| ATOM | 46 | C   | ALA | 4 | -4.714 | -2.982 | 1.424  | 1.00 | 1.00 | TAG | C   |
| ATOM | 47 | O   | ALA | 4 | -5.377 | -3.380 | 2.377  | 1.00 | 1.00 | TAG | O   |
| ATOM | 48 | CB  | ALA | 4 | -4.266 | -4.278 | -0.684 | 1.00 | 1.00 | TAG | C   |
| ATOM | 49 | H   | ALA | 4 | -4.512 | -2.005 | -1.501 | 1.00 | 1.00 | TAG | H   |
| ATOM | 50 | HA  | ALA | 4 | -6.209 | -3.681 | 0.030  | 1.00 | 1.00 | TAG | H   |
| ATOM | 51 | 1HB | ALA | 4 | -4.258 | -5.212 | -0.102 | 1.00 | 1.00 | TAG | H   |
| ATOM | 52 | 2HB | ALA | 4 | -4.625 | -4.484 | -1.702 | 1.00 | 1.00 | TAG | H   |
| ATOM | 53 | 3HB | ALA | 4 | -3.247 | -3.867 | -0.732 | 1.00 | 1.00 | TAG | H   |
| ATOM | 54 | N   | LYS | 5 | -3.619 | -2.328 | 1.601  | 1.00 | 1.00 | TAG | N   |
| ATOM | 55 | CA  | LYS | 5 | -3.104 | -1.996 | 2.924  | 1.00 | 1.00 | TAG | C   |
| ATOM | 56 | C   | LYS | 5 | -4.103 | -1.123 | 3.673  | 1.00 | 1.00 | TAG | C   |
| ATOM | 57 | O   | LYS | 5 | -4.500 | -1.455 | 4.775  | 1.00 | 1.00 | TAG | O   |
| ATOM | 58 | CB  | LYS | 5 | -1.757 | -1.275 | 2.809  | 1.00 | 1.00 | TAG | C   |
| ATOM | 59 | CG  | LYS | 5 | -0.625 | -2.187 | 2.408  | 1.00 | 1.00 | TAG | C   |
| ATOM | 60 | CD  | LYS | 5 | 0.677  | -1.429 | 2.265  | 1.00 | 1.00 | TAG | C   |
| ATOM | 61 | CE  | LYS | 5 | 1.780  | -2.386 | 1.825  | 1.00 | 1.00 | TAG | C   |
| ATOM | 62 | NZ  | LYS | 5 | 3.031  | -1.688 | 1.433  | 1.00 | 1.00 | TAG | N   |
| ATOM | 63 | H   | LYS | 5 | -3.045 | -2.002 | 0.850  | 1.00 | 1.00 | TAG | H   |
| ATOM | 64 | HA  | LYS | 5 | -2.956 | -2.931 | 3.485  | 1.00 | 1.00 | TAG | H   |
| ATOM | 65 | 1HB | LYS | 5 | -1.845 | -0.464 | 2.070  | 1.00 | 1.00 | TAG | H   |
| ATOM | 66 | 2HB | LYS | 5 | -1.516 | -0.805 | 3.775  | 1.00 | 1.00 | TAG | H   |
| ATOM | 67 | 1HG | LYS | 5 | -0.508 | -2.980 | 3.161  | 1.00 | 1.00 | TAG | H   |
| ATOM | 68 | 2HG | LYS | 5 | -0.870 | -2.680 | 1.456  | 1.00 | 1.00 | TAG | H   |
| ATOM | 69 | 1HD | LYS | 5 | 0.564  | -0.620 | 1.530  | 1.00 | 1.00 | TAG | H   |
| ATOM | 70 | 2HD | LYS | 5 | 0.947  | -0.958 | 3.223  | 1.00 | 1.00 | TAG | H   |
| ATOM | 71 | 1HE | LYS | 5 | 1.998  | -3.088 | 2.643  | 1.00 | 1.00 | TAG | H   |
| ATOM | 72 | 2HE | LYS | 5 | 1.420  | -2.986 | 0.976  | 1.00 | 1.00 | TAG | H   |
| ATOM | 73 | H01 | LYS | 5 | 3.285  | -1.023 | 2.150  | 1.00 | 1.00 | TAG | H   |
| ATOM | 74 | H02 | LYS | 5 | 2.887  | -1.203 | 0.559  | 1.00 | 1.00 | TAG | H   |
| ATOM | 75 | N   | ARG | 6 | -4.521 | -0.029 | 3.077  | 1.00 | 1.00 | TAG | N   |
| ATOM | 76 | CA  | ARG | 6 | -5.451 | 0.928  | 3.704  | 1.00 | 1.00 | TAG | C   |
| ATOM | 77 | C   | ARG | 6 | -6.815 | 0.288  | 3.908  | 1.00 | 1.00 | TAG | C   |
| ATOM | 78 | O   | ARG | 6 | -7.336 | 0.249  | 5.033  | 1.00 | 1.00 | TAG | O   |
| ATOM | 79 | CB  | ARG | 6 | -5.604 | 2.222  | 2.893  | 1.00 | 1.00 | TAG | C   |
| ATOM | 80 | CG  | ARG | 6 | -4.366 | 3.070  | 2.832  | 1.00 | 1.00 | TAG | C   |
| ATOM | 81 | CD  | ARG | 6 | -3.997 | 3.621  | 4.188  | 1.00 | 1.00 | TAG | C   |
| ATOM | 82 | NE  | ARG | 6 | -2.577 | 3.954  | 4.232  | 1.00 | 1.00 | TAG | N   |
| ATOM | 83 | CZ  | ARG | 6 | -2.057 | 4.953  | 4.936  | 1.00 | 1.00 | TAG | C   |
| ATOM | 84 | NH1 | ARG | 6 | -2.848 | 5.783  | 5.619  | 1.00 | 1.00 | TAG | N   |
| ATOM | 85 | NH2 | ARG | 6 | -0.742 | 5.161  | 4.903  | 1.00 | 1.00 | TAG | N1+ |
| ATOM | 86 | H   | ARG | 6 | -4.238 | 0.233  | 2.155  | 1.00 | 1.00 | TAG | H   |
| ATOM | 87 | HA  | ARG | 6 | -5.016 | 1.199  | 4.678  | 1.00 | 1.00 | TAG | H   |
| ATOM | 88 | 1HB | ARG | 6 | -5.905 | 1.962  | 1.867  | 1.00 | 1.00 | TAG | H   |
| ATOM | 89 | 2HB | ARG | 6 | -6.421 | 2.818  | 3.327  | 1.00 | 1.00 | TAG | H   |
| ATOM | 90 | 1HG | ARG | 6 | -3.530 | 2.471  | 2.440  | 1.00 | 1.00 | TAG | H   |
| ATOM | 91 | 2HG | ARG | 6 | -4.524 | 3.901  | 2.129  | 1.00 | 1.00 | TAG | H   |
| ATOM | 92 | 1HD | ARG | 6 | -4.597 | 4.517  | 4.402  | 1.00 | 1.00 | TAG | H   |
| ATOM | 93 | 2HD | ARG | 6 | -4.231 | 2.882  | 4.968  | 1.00 | 1.00 | TAG | H   |
| ATOM | 94 | HE  | ARG | 6 | -1.950 | 3.390  | 3.693  | 1.00 | 1.00 | TAG | H   |
| ATOM | 95 | H01 | ARG | 6 | -3.848 | 5.639  | 5.623  | 1.00 | 1.00 | TAG | H   |

|      |     |     |     |    |         |        |        |      |      |     |   |
|------|-----|-----|-----|----|---------|--------|--------|------|------|-----|---|
| ATOM | 96  | H02 | ARG | 6  | -2.447  | 6.555  | 6.132  | 1.00 | 1.00 | TAG | H |
| ATOM | 97  | H03 | ARG | 6  | -0.420  | 5.430  | 5.822  | 1.00 | 1.00 | TAG | H |
| ATOM | 98  | H04 | ARG | 6  | -0.533  | 5.897  | 4.244  | 1.00 | 1.00 | TAG | H |
| ATOM | 99  | H05 | ARG | 6  | -0.274  | 4.312  | 4.618  | 1.00 | 1.00 | TAG | H |
| ATOM | 100 | N   | HIS | 7  | -7.432  | -0.226 | 2.855  | 1.00 | 1.00 | TAG | N |
| ATOM | 101 | CA  | HIS | 7  | -8.772  | -0.793 | 2.911  | 1.00 | 1.00 | TAG | C |
| ATOM | 102 | C   | HIS | 7  | -8.825  | -2.297 | 3.184  | 1.00 | 1.00 | TAG | C |
| ATOM | 103 | O   | HIS | 7  | -9.644  | -2.786 | 3.977  | 1.00 | 1.00 | TAG | O |
| ATOM | 104 | CB  | HIS | 7  | -9.569  | -0.423 | 1.666  | 1.00 | 1.00 | TAG | C |
| ATOM | 105 | CG  | HIS | 7  | -10.133 | 0.960  | 1.717  | 1.00 | 1.00 | TAG | C |
| ATOM | 106 | CD2 | HIS | 7  | -9.488  | 2.050  | 1.174  | 1.00 | 1.00 | TAG | C |
| ATOM | 107 | ND1 | HIS | 7  | -11.273 | 1.442  | 2.276  | 1.00 | 1.00 | TAG | N |
| ATOM | 108 | CE1 | HIS | 7  | -11.292 | 2.796  | 2.065  | 1.00 | 1.00 | TAG | C |
| ATOM | 109 | NE2 | HIS | 7  | -10.204 | 3.144  | 1.396  | 1.00 | 1.00 | TAG | N |
| ATOM | 110 | H   | HIS | 7  | -7.020  | -0.262 | 1.945  | 1.00 | 1.00 | TAG | H |
| ATOM | 111 | HA  | HIS | 7  | -9.243  | -0.336 | 3.793  | 1.00 | 1.00 | TAG | H |
| ATOM | 112 | 1HB | HIS | 7  | -8.920  | -0.515 | 0.784  | 1.00 | 1.00 | TAG | H |
| ATOM | 113 | 2HB | HIS | 7  | -10.390 | -1.143 | 1.537  | 1.00 | 1.00 | TAG | H |
| ATOM | 114 | HD1 | HIS | 7  | -11.971 | 0.907  | 2.754  | 1.00 | 1.00 | TAG | H |
| ATOM | 115 | HD2 | HIS | 7  | -8.528  | 2.017  | 0.638  | 1.00 | 1.00 | TAG | H |
| ATOM | 116 | HE1 | HIS | 7  | -12.084 | 3.483  | 2.398  | 1.00 | 1.00 | TAG | H |
| ATOM | 117 | N   | HIS | 8  | -7.942  | -3.062 | 2.524  | 1.00 | 1.00 | TAG | N |
| ATOM | 118 | CA  | HIS | 8  | -8.024  | -4.516 | 2.535  | 1.00 | 1.00 | TAG | C |
| ATOM | 119 | C   | HIS | 8  | -7.639  | -5.173 | 3.861  | 1.00 | 1.00 | TAG | C |
| ATOM | 120 | O   | HIS | 8  | -7.288  | -6.359 | 3.894  | 1.00 | 1.00 | TAG | O |
| ATOM | 121 | CB  | HIS | 8  | -7.244  | -5.111 | 1.370  | 1.00 | 1.00 | TAG | C |
| ATOM | 122 | CG  | HIS | 8  | -7.989  | -5.063 | 0.075  | 1.00 | 1.00 | TAG | C |
| ATOM | 123 | CD2 | HIS | 8  | -8.919  | -5.897 | -0.454 | 1.00 | 1.00 | TAG | C |
| ATOM | 124 | ND1 | HIS | 8  | -7.839  | -4.038 | -0.834 | 1.00 | 1.00 | TAG | N |
| ATOM | 125 | CE1 | HIS | 8  | -8.645  | -4.241 | -1.868 | 1.00 | 1.00 | TAG | C |
| ATOM | 126 | NE2 | HIS | 8  | -9.309  | -5.367 | -1.657 | 1.00 | 1.00 | TAG | N |
| ATOM | 127 | H   | HIS | 8  | -7.181  | -2.696 | 1.988  | 1.00 | 1.00 | TAG | H |
| ATOM | 128 | HA  | HIS | 8  | -9.092  | -4.747 | 2.413  | 1.00 | 1.00 | TAG | H |
| ATOM | 129 | 1HB | HIS | 8  | -6.293  | -4.569 | 1.259  | 1.00 | 1.00 | TAG | H |
| ATOM | 130 | 2HB | HIS | 8  | -6.993  | -6.156 | 1.603  | 1.00 | 1.00 | TAG | H |
| ATOM | 131 | HD2 | HIS | 8  | -9.292  | -6.828 | -0.002 | 1.00 | 1.00 | TAG | H |
| ATOM | 132 | HE1 | HIS | 8  | -8.744  | -3.587 | -2.747 | 1.00 | 1.00 | TAG | H |
| ATOM | 133 | HE2 | HIS | 8  | -9.986  | -5.767 | -2.275 | 1.00 | 1.00 | TAG | H |
| ATOM | 134 | N   | GLY | 9  | -7.888  | -4.361 | 4.956  | 1.00 | 1.00 | TAG | N |
| ATOM | 135 | CA  | GLY | 9  | -7.682  | -4.810 | 6.344  | 1.00 | 1.00 | TAG | C |
| ATOM | 136 | C   | GLY | 9  | -6.309  | -5.442 | 6.609  | 1.00 | 1.00 | TAG | C |
| ATOM | 137 | O   | GLY | 9  | -6.198  | -6.481 | 7.266  | 1.00 | 1.00 | TAG | O |
| ATOM | 138 | H   | GLY | 9  | -8.221  | -3.421 | 4.879  | 1.00 | 1.00 | TAG | H |
| ATOM | 139 | 1HA | GLY | 9  | -7.812  | -3.950 | 7.017  | 1.00 | 1.00 | TAG | H |
| ATOM | 140 | 2HA | GLY | 9  | -8.463  | -5.540 | 6.600  | 1.00 | 1.00 | TAG | H |
| ATOM | 141 | N   | TYR | 10 | -5.292  | -4.815 | 6.069  | 1.00 | 0.00 | TAG | N |
| ATOM | 142 | CA  | TYR | 10 | -3.921  | -5.266 | 6.293  | 1.00 | 0.00 | TAG | C |
| ATOM | 143 | C   | TYR | 10 | -3.261  | -4.467 | 7.390  | 1.00 | 0.00 | TAG | C |
| ATOM | 144 | O   | TYR | 10 | -2.087  | -4.617 | 7.648  | 1.00 | 0.00 | TAG | O |
| ATOM | 145 | CB  | TYR | 10 | -3.066  | -5.108 | 5.002  | 1.00 | 0.00 | TAG | C |
| ATOM | 146 | CG  | TYR | 10 | -3.519  | -5.906 | 3.774  | 1.00 | 0.00 | TAG | C |

|      |     |     |     |    |        |        |        |      |      |     |     |
|------|-----|-----|-----|----|--------|--------|--------|------|------|-----|-----|
| ATOM | 147 | CD1 | TYR | 10 | -4.425 | -6.963 | 3.905  | 1.00 | 0.00 | TAG | C   |
| ATOM | 148 | CD2 | TYR | 10 | -3.030 | -5.569 | 2.508  | 1.00 | 0.00 | TAG | C   |
| ATOM | 149 | CE1 | TYR | 10 | -4.840 | -7.670 | 2.780  | 1.00 | 0.00 | TAG | C   |
| ATOM | 150 | CE2 | TYR | 10 | -3.446 | -6.277 | 1.385  | 1.00 | 0.00 | TAG | C   |
| ATOM | 151 | CZ  | TYR | 10 | -4.351 | -7.328 | 1.522  | 1.00 | 0.00 | TAG | C   |
| ATOM | 152 | OH  | TYR | 10 | -4.763 | -8.023 | 0.420  | 1.00 | 0.00 | TAG | O   |
| ATOM | 153 | H   | TYR | 10 | -5.457 | -4.016 | 5.494  | 1.00 | 0.00 | TAG | H   |
| ATOM | 154 | HA  | TYR | 10 | -3.940 | -6.326 | 6.609  | 1.00 | 0.00 | TAG | H   |
| ATOM | 155 | 2HB | TYR | 10 | -2.016 | -5.391 | 5.214  | 1.00 | 0.00 | TAG | H   |
| ATOM | 156 | 3HB | TYR | 10 | -2.994 | -4.032 | 4.739  | 1.00 | 0.00 | TAG | H   |
| ATOM | 157 | 1HD | TYR | 10 | -4.814 | -7.232 | 4.877  | 1.00 | 0.00 | TAG | H   |
| ATOM | 158 | 2HD | TYR | 10 | -2.336 | -4.748 | 2.393  | 1.00 | 0.00 | TAG | H   |
| ATOM | 159 | 1HE | TYR | 10 | -5.545 | -8.482 | 2.878  | 1.00 | 0.00 | TAG | H   |
| ATOM | 160 | 2HE | TYR | 10 | -3.066 | -6.003 | 0.412  | 1.00 | 0.00 | TAG | H   |
| ATOM | 161 | HH  | TYR | 10 | -4.331 | -7.652 | -0.352 | 1.00 | 0.00 | TAG | H   |
| ATOM | 162 | N   | LYS | 11 | -3.892 | -3.668 | 8.085  | 1.00 | 1.00 | TAG | N   |
| ATOM | 163 | CA  | LYS | 11 | -3.294 | -2.737 | 9.036  | 1.00 | 1.00 | TAG | C   |
| ATOM | 164 | C   | LYS | 11 | -2.940 | -3.472 | 10.314 | 1.00 | 1.00 | TAG | C   |
| ATOM | 165 | O   | LYS | 11 | -1.829 | -3.281 | 10.829 | 1.00 | 1.00 | TAG | O   |
| ATOM | 166 | CB  | LYS | 11 | -4.267 | -1.595 | 9.331  | 1.00 | 1.00 | TAG | C   |
| ATOM | 167 | CG  | LYS | 11 | -3.735 | -0.527 | 10.264 | 1.00 | 1.00 | TAG | C   |
| ATOM | 168 | CD  | LYS | 11 | -4.484 | 0.771  | 10.024 | 1.00 | 1.00 | TAG | C   |
| ATOM | 169 | CE  | LYS | 11 | -4.027 | 1.883  | 10.948 | 1.00 | 1.00 | TAG | C   |
| ATOM | 170 | NZ  | LYS | 11 | -4.621 | 1.712  | 12.291 | 1.00 | 1.00 | TAG | N   |
| ATOM | 171 | H   | LYS | 11 | -4.888 | -3.589 | 8.046  | 1.00 | 1.00 | TAG | H   |
| ATOM | 172 | HA  | LYS | 11 | -2.377 | -2.314 | 8.602  | 1.00 | 1.00 | TAG | H   |
| ATOM | 173 | 1HB | LYS | 11 | -4.552 | -1.121 | 8.380  | 1.00 | 1.00 | TAG | H   |
| ATOM | 174 | 2HB | LYS | 11 | -5.184 | -2.018 | 9.768  | 1.00 | 1.00 | TAG | H   |
| ATOM | 175 | 1HG | LYS | 11 | -3.854 | -0.845 | 11.310 | 1.00 | 1.00 | TAG | H   |
| ATOM | 176 | 2HG | LYS | 11 | -2.658 | -0.379 | 10.094 | 1.00 | 1.00 | TAG | H   |
| ATOM | 177 | 1HD | LYS | 11 | -4.343 | 1.085  | 8.979  | 1.00 | 1.00 | TAG | H   |
| ATOM | 178 | 2HD | LYS | 11 | -5.562 | 0.600  | 10.166 | 1.00 | 1.00 | TAG | H   |
| ATOM | 179 | 1HE | LYS | 11 | -2.930 | 1.880  | 11.021 | 1.00 | 1.00 | TAG | H   |
| ATOM | 180 | 2HE | LYS | 11 | -4.319 | 2.858  | 10.531 | 1.00 | 1.00 | TAG | H   |
| ATOM | 181 | H01 | LYS | 11 | -4.641 | 2.603  | 12.767 | 1.00 | 1.00 | TAG | H   |
| ATOM | 182 | H02 | LYS | 11 | -4.067 | 1.057  | 12.824 | 1.00 | 1.00 | TAG | H   |
| ATOM | 183 | N   | ARG | 12 | -3.728 | -4.258 | 10.860 | 1.00 | 1.00 | TAG | N   |
| ATOM | 184 | CA  | ARG | 12 | -3.534 | -4.912 | 12.144 | 1.00 | 1.00 | TAG | C   |
| ATOM | 185 | C   | ARG | 12 | -2.344 | -5.830 | 11.877 | 1.00 | 1.00 | TAG | C   |
| ATOM | 186 | O   | ARG | 12 | -1.641 | -6.104 | 12.999 | 1.00 | 1.00 | TAG | O   |
| ATOM | 187 | CB  | ARG | 12 | -4.797 | -5.705 | 12.494 | 1.00 | 1.00 | TAG | C   |
| ATOM | 188 | CG  | ARG | 12 | -4.753 | -6.411 | 13.848 | 1.00 | 1.00 | TAG | C   |
| ATOM | 189 | CD  | ARG | 12 | -6.139 | -6.871 | 14.282 | 1.00 | 1.00 | TAG | C   |
| ATOM | 190 | NE  | ARG | 12 | -6.897 | -7.440 | 13.171 | 1.00 | 1.00 | TAG | N   |
| ATOM | 191 | CZ  | ARG | 12 | -8.153 | -7.110 | 12.872 | 1.00 | 1.00 | TAG | C   |
| ATOM | 192 | NH1 | ARG | 12 | -8.806 | -6.212 | 13.606 | 1.00 | 1.00 | TAG | N   |
| ATOM | 193 | NH2 | ARG | 12 | -8.751 | -7.666 | 11.821 | 1.00 | 1.00 | TAG | N1+ |
| ATOM | 194 | H   | ARG | 12 | -4.597 | -4.509 | 10.435 | 1.00 | 1.00 | TAG | H   |
| ATOM | 195 | HA  | ARG | 12 | -3.353 | -4.231 | 12.987 | 1.00 | 1.00 | TAG | H   |
| ATOM | 196 | 1HB | ARG | 12 | -5.658 | -5.021 | 12.481 | 1.00 | 1.00 | TAG | H   |
| ATOM | 197 | 2HB | ARG | 12 | -4.970 | -6.457 | 11.710 | 1.00 | 1.00 | TAG | H   |

|      |     |      |     |    |        |         |        |      |      |     |   |
|------|-----|------|-----|----|--------|---------|--------|------|------|-----|---|
| ATOM | 198 | 1HG  | ARG | 12 | -4.079 | -7.278  | 13.790 | 1.00 | 1.00 | TAG | H |
| ATOM | 199 | 2HG  | ARG | 12 | -4.337 | -5.730  | 14.605 | 1.00 | 1.00 | TAG | H |
| ATOM | 200 | 1HD  | ARG | 12 | -6.042 | -7.620  | 15.081 | 1.00 | 1.00 | TAG | H |
| ATOM | 201 | 2HD  | ARG | 12 | -6.692 | -6.019  | 14.705 | 1.00 | 1.00 | TAG | H |
| ATOM | 202 | HE   | ARG | 12 | -6.444 | -8.122  | 12.596 | 1.00 | 1.00 | TAG | H |
| ATOM | 203 | 1HH1 | ARG | 12 | -8.354 | -5.781  | 14.387 | 1.00 | 1.00 | TAG | H |
| ATOM | 204 | 2HH1 | ARG | 12 | -9.749 | -5.968  | 13.377 | 1.00 | 1.00 | TAG | H |
| ATOM | 205 | H01  | ARG | 12 | -8.993 | -8.622  | 12.038 | 1.00 | 1.00 | TAG | H |
| ATOM | 206 | H02  | ARG | 12 | -8.125 | -7.648  | 11.028 | 1.00 | 1.00 | TAG | H |
| ATOM | 207 | H03  | ARG | 12 | -9.590 | -7.149  | 11.599 | 1.00 | 1.00 | TAG | H |
| ATOM | 208 | N    | LYS | 13 | -2.090 | -6.451  | 10.909 | 1.00 | 1.00 | TAG | N |
| ATOM | 209 | CA   | LYS | 13 | -0.848 | -7.156  | 10.616 | 1.00 | 1.00 | TAG | C |
| ATOM | 210 | C    | LYS | 13 | 0.189  | -6.186  | 10.065 | 1.00 | 1.00 | TAG | C |
| ATOM | 211 | O    | LYS | 13 | 1.265  | -6.032  | 10.662 | 1.00 | 1.00 | TAG | O |
| ATOM | 212 | CB   | LYS | 13 | -1.098 | -8.286  | 9.611  | 1.00 | 1.00 | TAG | C |
| ATOM | 213 | CG   | LYS | 13 | -1.827 | -9.464  | 10.209 | 1.00 | 1.00 | TAG | C |
| ATOM | 214 | CD   | LYS | 13 | -2.089 | -10.538 | 9.175  | 1.00 | 1.00 | TAG | C |
| ATOM | 215 | CE   | LYS | 13 | -2.859 | -11.688 | 9.819  | 1.00 | 1.00 | TAG | C |
| ATOM | 216 | NZ   | LYS | 13 | -3.363 | -12.673 | 8.830  | 1.00 | 1.00 | TAG | N |
| ATOM | 217 | H    | LYS | 13 | -2.755 | -6.546  | 10.167 | 1.00 | 1.00 | TAG | H |
| ATOM | 218 | HA   | LYS | 13 | -0.466 | -7.594  | 11.549 | 1.00 | 1.00 | TAG | H |
| ATOM | 219 | 1HB  | LYS | 13 | -1.682 | -7.894  | 8.766  | 1.00 | 1.00 | TAG | H |
| ATOM | 220 | 2HB  | LYS | 13 | -0.134 | -8.627  | 9.206  | 1.00 | 1.00 | TAG | H |
| ATOM | 221 | 1HG  | LYS | 13 | -1.232 | -9.885  | 11.034 | 1.00 | 1.00 | TAG | H |
| ATOM | 222 | 2HG  | LYS | 13 | -2.781 | -9.127  | 10.641 | 1.00 | 1.00 | TAG | H |
| ATOM | 223 | 1HD  | LYS | 13 | -2.665 | -10.121 | 8.336  | 1.00 | 1.00 | TAG | H |
| ATOM | 224 | 2HD  | LYS | 13 | -1.138 | -10.906 | 8.762  | 1.00 | 1.00 | TAG | H |
| ATOM | 225 | 1HE  | LYS | 13 | -2.206 | -12.201 | 10.540 | 1.00 | 1.00 | TAG | H |
| ATOM | 226 | 2HE  | LYS | 13 | -3.708 | -11.280 | 10.388 | 1.00 | 1.00 | TAG | H |
| ATOM | 227 | H01  | LYS | 13 | -3.573 | -13.543 | 9.298  | 1.00 | 1.00 | TAG | H |
| ATOM | 228 | H02  | LYS | 13 | -2.659 | -12.831 | 8.123  | 1.00 | 1.00 | TAG | H |
| ATOM | 229 | N    | PHE | 14 | -0.041 | -5.505  | 8.993  | 1.00 | 0.00 | TAG | N |
| ATOM | 230 | CA   | PHE | 14 | 1.006  | -4.765  | 8.296  | 1.00 | 0.00 | TAG | C |
| ATOM | 231 | C    | PHE | 14 | 1.222  | -3.409  | 8.924  | 1.00 | 0.00 | TAG | C |
| ATOM | 232 | O    | PHE | 14 | 2.115  | -2.644  | 8.478  | 1.00 | 0.00 | TAG | O |
| ATOM | 233 | CB   | PHE | 14 | 0.618  | -4.569  | 6.799  | 1.00 | 0.00 | TAG | C |
| ATOM | 234 | CG   | PHE | 14 | 0.563  | -5.838  | 5.934  | 1.00 | 0.00 | TAG | C |
| ATOM | 235 | CD1  | PHE | 14 | 1.154  | -7.018  | 6.400  | 1.00 | 0.00 | TAG | C |
| ATOM | 236 | CD2  | PHE | 14 | -0.015 | -5.814  | 4.662  | 1.00 | 0.00 | TAG | C |
| ATOM | 237 | CE1  | PHE | 14 | 1.183  | -8.153  | 5.597  | 1.00 | 0.00 | TAG | C |
| ATOM | 238 | CE2  | PHE | 14 | 0.006  | -6.953  | 3.862  | 1.00 | 0.00 | TAG | C |
| ATOM | 239 | CZ   | PHE | 14 | 0.608  | -8.121  | 4.329  | 1.00 | 0.00 | TAG | C |
| ATOM | 240 | H    | PHE | 14 | -0.972 | -5.483  | 8.626  | 1.00 | 0.00 | TAG | H |
| ATOM | 241 | HA   | PHE | 14 | 1.955  | -5.331  | 8.368  | 1.00 | 0.00 | TAG | H |
| ATOM | 242 | 2HB  | PHE | 14 | 1.321  | -3.855  | 6.326  | 1.00 | 0.00 | TAG | H |
| ATOM | 243 | 3HB  | PHE | 14 | -0.360 | -4.049  | 6.733  | 1.00 | 0.00 | TAG | H |
| ATOM | 244 | 1HD  | PHE | 14 | 1.631  | -7.041  | 7.371  | 1.00 | 0.00 | TAG | H |
| ATOM | 245 | 2HD  | PHE | 14 | -0.464 | -4.905  | 4.286  | 1.00 | 0.00 | TAG | H |
| ATOM | 246 | 1HE  | PHE | 14 | 1.669  | -9.049  | 5.954  | 1.00 | 0.00 | TAG | H |
| ATOM | 247 | 2HE  | PHE | 14 | -0.435 | -6.927  | 2.877  | 1.00 | 0.00 | TAG | H |
| ATOM | 248 | HZ   | PHE | 14 | 0.637  | -9.001  | 3.705  | 1.00 | 0.00 | TAG | H |

|      |     |     |     |    |        |         |        |      |      |         |
|------|-----|-----|-----|----|--------|---------|--------|------|------|---------|
| ATOM | 249 | N   | HIS | 15 | 0.515  | -3.093  | 10.006 | 1.00 | 1.00 | TAG N   |
| ATOM | 250 | CA  | HIS | 15 | 0.674  | -1.815  | 10.739 | 1.00 | 1.00 | TAG C   |
| ATOM | 251 | C   | HIS | 15 | 1.749  | -1.967  | 11.792 | 1.00 | 1.00 | TAG C   |
| ATOM | 252 | O   | HIS | 15 | 2.691  | -1.137  | 11.858 | 1.00 | 1.00 | TAG O   |
| ATOM | 253 | CB  | HIS | 15 | -0.773 | -1.537  | 11.442 | 1.00 | 1.00 | TAG C   |
| ATOM | 254 | CG  | HIS | 15 | -0.566 | -0.300  | 12.285 | 1.00 | 1.00 | TAG C   |
| ATOM | 255 | CD2 | HIS | 15 | -0.391 | 0.983   | 11.917 | 1.00 | 1.00 | TAG C   |
| ATOM | 256 | ND1 | HIS | 15 | -0.631 | -0.257  | 13.671 | 1.00 | 1.00 | TAG N   |
| ATOM | 257 | CE1 | HIS | 15 | -0.377 | 1.035   | 14.017 | 1.00 | 1.00 | TAG C   |
| ATOM | 258 | NE2 | HIS | 15 | -0.299 | 1.804   | 12.932 | 1.00 | 1.00 | TAG N   |
| ATOM | 259 | H   | HIS | 15 | -0.183 | -3.699  | 10.387 | 1.00 | 1.00 | TAG H   |
| ATOM | 260 | HA  | HIS | 15 | 0.970  | -0.986  | 10.079 | 1.00 | 1.00 | TAG H   |
| ATOM | 261 | 1HB | HIS | 15 | -1.559 | -1.378  | 10.687 | 1.00 | 1.00 | TAG H   |
| ATOM | 262 | 2HB | HIS | 15 | -1.087 | -2.391  | 12.058 | 1.00 | 1.00 | TAG H   |
| ATOM | 263 | HD1 | HIS | 15 | -0.825 | -1.019  | 14.289 | 1.00 | 1.00 | TAG H   |
| ATOM | 264 | HD2 | HIS | 15 | -0.330 | 1.309   | 10.868 | 1.00 | 1.00 | TAG H   |
| ATOM | 265 | HE1 | HIS | 15 | -0.254 | 1.394   | 15.049 | 1.00 | 1.00 | TAG H   |
| ATOM | 266 | N   | GLU | 16 | 1.692  | -2.972  | 12.641 | 1.00 | 1.00 | TAG N   |
| ATOM | 267 | CA  | GLU | 16 | 2.590  | -3.130  | 13.782 | 1.00 | 1.00 | TAG C   |
| ATOM | 268 | C   | GLU | 16 | 3.910  | -3.713  | 13.294 | 1.00 | 1.00 | TAG C   |
| ATOM | 269 | O   | GLU | 16 | 4.977  | -3.172  | 13.631 | 1.00 | 1.00 | TAG O   |
| ATOM | 270 | CB  | GLU | 16 | 1.976  | -4.067  | 14.816 | 1.00 | 1.00 | TAG C   |
| ATOM | 271 | CG  | GLU | 16 | 2.805  | -4.218  | 16.081 | 1.00 | 1.00 | TAG C   |
| ATOM | 272 | CD  | GLU | 16 | 2.301  | -5.325  | 16.988 | 1.00 | 1.00 | TAG C   |
| ATOM | 273 | OE1 | GLU | 16 | 1.544  | -6.196  | 16.509 | 1.00 | 1.00 | TAG O   |
| ATOM | 274 | OE2 | GLU | 16 | 2.685  | -5.354  | 18.180 | 1.00 | 1.00 | TAG O   |
| ATOM | 275 | H   | GLU | 16 | 1.020  | -3.709  | 12.563 | 1.00 | 1.00 | TAG H   |
| ATOM | 276 | HA  | GLU | 16 | 2.756  | -2.149  | 14.249 | 1.00 | 1.00 | TAG H   |
| ATOM | 277 | 1HB | GLU | 16 | 0.977  | -3.694  | 15.086 | 1.00 | 1.00 | TAG H   |
| ATOM | 278 | 2HB | GLU | 16 | 1.836  | -5.059  | 14.361 | 1.00 | 1.00 | TAG H   |
| ATOM | 279 | 1HG | GLU | 16 | 3.850  | -4.424  | 15.806 | 1.00 | 1.00 | TAG H   |
| ATOM | 280 | 2HG | GLU | 16 | 2.798  | -3.267  | 16.634 | 1.00 | 1.00 | TAG H   |
| ATOM | 281 | H01 | GLU | 16 | 2.929  | -6.252  | 18.417 | 1.00 | 1.00 | TAG H   |
| ATOM | 282 | N   | LYS | 17 | 3.889  | -4.776  | 12.521 | 1.00 | 1.00 | TAG N   |
| ATOM | 283 | CA  | LYS | 17 | 5.076  | -5.545  | 12.164 | 1.00 | 1.00 | TAG C   |
| ATOM | 284 | C   | LYS | 17 | 5.746  | -4.920  | 10.957 | 1.00 | 1.00 | TAG C   |
| ATOM | 285 | O   | LYS | 17 | 6.970  | -4.755  | 10.934 | 1.00 | 1.00 | TAG O   |
| ATOM | 286 | CB  | LYS | 17 | 4.691  | -6.996  | 11.866 | 1.00 | 1.00 | TAG C   |
| ATOM | 287 | CG  | LYS | 17 | 5.852  | -7.911  | 11.541 | 1.00 | 1.00 | TAG C   |
| ATOM | 288 | CD  | LYS | 17 | 5.460  | -9.346  | 11.843 | 1.00 | 1.00 | TAG C   |
| ATOM | 289 | CE  | LYS | 17 | 6.565  | -10.330 | 11.510 | 1.00 | 1.00 | TAG C   |
| ATOM | 290 | NZ  | LYS | 17 | 6.611  | -10.581 | 10.055 | 1.00 | 1.00 | TAG N1+ |
| ATOM | 291 | H   | LYS | 17 | 3.048  | -5.136  | 12.118 | 1.00 | 1.00 | TAG H   |
| ATOM | 292 | HA  | LYS | 17 | 5.782  | -5.536  | 13.008 | 1.00 | 1.00 | TAG H   |
| ATOM | 293 | 1HB | LYS | 17 | 4.155  | -7.403  | 12.736 | 1.00 | 1.00 | TAG H   |
| ATOM | 294 | 2HB | LYS | 17 | 3.986  | -7.006  | 11.021 | 1.00 | 1.00 | TAG H   |
| ATOM | 295 | 1HG | LYS | 17 | 6.128  | -7.809  | 10.481 | 1.00 | 1.00 | TAG H   |
| ATOM | 296 | 2HG | LYS | 17 | 6.735  | -7.626  | 12.131 | 1.00 | 1.00 | TAG H   |
| ATOM | 297 | 1HD | LYS | 17 | 5.202  | -9.436  | 12.908 | 1.00 | 1.00 | TAG H   |
| ATOM | 298 | 2HD | LYS | 17 | 4.557  | -9.605  | 11.270 | 1.00 | 1.00 | TAG H   |
| ATOM | 299 | 1HE | LYS | 17 | 7.533  | -9.935  | 11.851 | 1.00 | 1.00 | TAG H   |



|      |     |     |     |    |       |         |        |      |      |       |
|------|-----|-----|-----|----|-------|---------|--------|------|------|-------|
| ATOM | 300 | 2HE | LYS | 17 | 6.397 | -11.276 | 12.046 | 1.00 | 1.00 | TAG H |
| ATOM | 301 | H01 | LYS | 17 | 5.819 | -10.138 | 9.611  | 1.00 | 1.00 | TAG H |
| ATOM | 302 | H02 | LYS | 17 | 6.581 | -11.576 | 9.883  | 1.00 | 1.00 | TAG H |
| ATOM | 303 | H03 | LYS | 17 | 7.466 | -10.200 | 9.675  | 1.00 | 1.00 | TAG H |
| ATOM | 304 | N   | HIS | 18 | 4.973 | -4.404  | 10.017 | 1.00 | 0.00 | TAG N |
| ATOM | 305 | CA  | HIS | 18 | 5.427 | -3.934  | 8.711  | 1.00 | 0.00 | TAG C |
| ATOM | 306 | C   | HIS | 18 | 6.029 | -2.553  | 8.812  | 1.00 | 0.00 | TAG C |
| ATOM | 307 | O   | HIS | 18 | 7.152 | -2.279  | 8.317  | 1.00 | 0.00 | TAG O |
| ATOM | 308 | CB  | HIS | 18 | 4.186 | -3.913  | 7.804  | 1.00 | 0.00 | TAG C |
| ATOM | 309 | CG  | HIS | 18 | 4.494 | -3.395  | 6.429  | 1.00 | 0.00 | TAG C |
| ATOM | 310 | CD2 | HIS | 18 | 4.099 | -2.136  | 5.996  | 1.00 | 0.00 | TAG C |
| ATOM | 311 | ND1 | HIS | 18 | 5.192 | -4.079  | 5.436  | 1.00 | 0.00 | TAG N |
| ATOM | 312 | CE1 | HIS | 18 | 5.159 | -3.159  | 4.455  | 1.00 | 0.00 | TAG C |
| ATOM | 313 | NE2 | HIS | 18 | 4.532 | -1.977  | 4.705  | 1.00 | 0.00 | TAG N |
| ATOM | 314 | H   | HIS | 18 | 3.999 | -4.330  | 10.216 | 1.00 | 0.00 | TAG H |
| ATOM | 315 | HA  | HIS | 18 | 6.235 | -4.607  | 8.376  | 1.00 | 0.00 | TAG H |
| ATOM | 316 | 2HB | HIS | 18 | 3.385 | -3.280  | 8.235  | 1.00 | 0.00 | TAG H |
| ATOM | 317 | 3HB | HIS | 18 | 3.735 | -4.921  | 7.689  | 1.00 | 0.00 | TAG H |
| ATOM | 318 | 2HD | HIS | 18 | 3.544 | -1.424  | 6.600  | 1.00 | 0.00 | TAG H |
| ATOM | 319 | 1HE | HIS | 18 | 5.637 | -3.409  | 3.517  | 1.00 | 0.00 | TAG H |
| ATOM | 320 | 2HE | HIS | 18 | 4.408 | -1.163  | 4.086  | 1.00 | 0.00 | TAG H |
| ATOM | 321 | N   | HIS | 19 | 5.254 | -1.534  | 9.282  | 1.00 | 0.00 | TAG N |
| ATOM | 322 | CA  | HIS | 19 | 5.728 | -0.156  | 9.191  | 1.00 | 0.00 | TAG C |
| ATOM | 323 | C   | HIS | 19 | 5.987 | 0.420   | 10.563 | 1.00 | 0.00 | TAG C |
| ATOM | 324 | O   | HIS | 19 | 7.071 | 0.994   | 10.905 | 1.00 | 0.00 | TAG O |
| ATOM | 325 | CB  | HIS | 19 | 4.621 | 0.636   | 8.477  | 1.00 | 0.00 | TAG C |
| ATOM | 326 | CG  | HIS | 19 | 5.006 | 2.067   | 8.238  | 1.00 | 0.00 | TAG C |
| ATOM | 327 | CD2 | HIS | 19 | 4.434 | 3.124   | 8.932  | 1.00 | 0.00 | TAG C |
| ATOM | 328 | ND1 | HIS | 19 | 5.956 | 2.514   | 7.322  | 1.00 | 0.00 | TAG N |
| ATOM | 329 | CE1 | HIS | 19 | 5.877 | 3.840   | 7.537  | 1.00 | 0.00 | TAG C |
| ATOM | 330 | NE2 | HIS | 19 | 5.001 | 4.286   | 8.478  | 1.00 | 0.00 | TAG N |
| ATOM | 331 | H   | HIS | 19 | 4.379 | -1.727  | 9.681  | 1.00 | 0.00 | TAG H |
| ATOM | 332 | HA  | HIS | 19 | 6.699 | -0.170  | 8.667  | 1.00 | 0.00 | TAG H |
| ATOM | 333 | 2HB | HIS | 19 | 3.681 | 0.631   | 9.065  | 1.00 | 0.00 | TAG H |
| ATOM | 334 | 3HB | HIS | 19 | 4.355 | 0.191   | 7.495  | 1.00 | 0.00 | TAG H |
| ATOM | 335 | 2HD | HIS | 19 | 3.670 | 3.016   | 9.698  | 1.00 | 0.00 | TAG H |
| ATOM | 336 | 1HE | HIS | 19 | 6.520 | 4.482   | 6.949  | 1.00 | 0.00 | TAG H |
| ATOM | 337 | 2HE | HIS | 19 | 4.805 | 5.253   | 8.777  | 1.00 | 0.00 | TAG H |
| ATOM | 338 | N   | SER | 20 | 4.946 | 0.349   | 11.481 | 1.00 | 1.00 | TAG N |
| ATOM | 339 | CA  | SER | 20 | 4.974 | 1.063   | 12.758 | 1.00 | 1.00 | TAG C |
| ATOM | 340 | C   | SER | 20 | 6.074 | 0.606   | 13.706 | 1.00 | 1.00 | TAG C |
| ATOM | 341 | O   | SER | 20 | 7.028 | 1.267   | 14.086 | 1.00 | 1.00 | TAG O |
| ATOM | 342 | CB  | SER | 20 | 3.625 | 0.900   | 13.464 | 1.00 | 1.00 | TAG C |
| ATOM | 343 | OG  | SER | 20 | 3.674 | 1.456   | 14.765 | 1.00 | 1.00 | TAG O |
| ATOM | 344 | H   | SER | 20 | 4.124 | -0.199  | 11.327 | 1.00 | 1.00 | TAG H |
| ATOM | 345 | HA  | SER | 20 | 5.182 | 2.115   | 12.511 | 1.00 | 1.00 | TAG H |
| ATOM | 346 | 1HB | SER | 20 | 2.836 | 1.394   | 12.877 | 1.00 | 1.00 | TAG H |
| ATOM | 347 | 2HB | SER | 20 | 3.362 | -0.166  | 13.524 | 1.00 | 1.00 | TAG H |
| ATOM | 348 | HG  | SER | 20 | 4.271 | 2.259   | 14.763 | 1.00 | 1.00 | TAG H |
| ATOM | 349 | N   | HIS | 21 | 5.962 | -0.688  | 14.167 | 1.00 | 1.00 | TAG N |
| ATOM | 350 | CA  | HIS | 21 | 6.875 | -1.249  | 15.152 | 1.00 | 1.00 | TAG C |

|      |     |     |     |    |        |        |        |      |      |         |
|------|-----|-----|-----|----|--------|--------|--------|------|------|---------|
| ATOM | 351 | C   | HIS | 21 | 8.213  | -1.733 | 14.589 | 1.00 | 1.00 | TAG C   |
| ATOM | 352 | O   | HIS | 21 | 9.030  | -2.488 | 15.128 | 1.00 | 1.00 | TAG O   |
| ATOM | 353 | CB  | HIS | 21 | 6.187  | -2.334 | 15.970 | 1.00 | 1.00 | TAG C   |
| ATOM | 354 | CG  | HIS | 21 | 5.320  | -1.792 | 17.060 | 1.00 | 1.00 | TAG C   |
| ATOM | 355 | CD2 | HIS | 21 | 3.969  | -1.577 | 16.899 | 1.00 | 1.00 | TAG C   |
| ATOM | 356 | ND1 | HIS | 21 | 5.615  | -1.385 | 18.321 | 1.00 | 1.00 | TAG N   |
| ATOM | 357 | CE1 | HIS | 21 | 4.451  | -0.937 | 18.891 | 1.00 | 1.00 | TAG C   |
| ATOM | 358 | NE2 | HIS | 21 | 3.465  | -1.062 | 18.014 | 1.00 | 1.00 | TAG N   |
| ATOM | 359 | H   | HIS | 21 | 5.254  | -1.324 | 13.860 | 1.00 | 1.00 | TAG H   |
| ATOM | 360 | HA  | HIS | 21 | 7.143  | -0.411 | 15.812 | 1.00 | 1.00 | TAG H   |
| ATOM | 361 | 1HB | HIS | 21 | 5.576  | -2.956 | 15.300 | 1.00 | 1.00 | TAG H   |
| ATOM | 362 | 2HB | HIS | 21 | 6.952  | -2.990 | 16.412 | 1.00 | 1.00 | TAG H   |
| ATOM | 363 | HD1 | HIS | 21 | 6.516  | -1.408 | 18.756 | 1.00 | 1.00 | TAG H   |
| ATOM | 364 | HD2 | HIS | 21 | 3.395  | -1.798 | 15.987 | 1.00 | 1.00 | TAG H   |
| ATOM | 365 | HE1 | HIS | 21 | 4.351  | -0.540 | 19.912 | 1.00 | 1.00 | TAG H   |
| ATOM | 366 | N   | ARG | 22 | 8.441  | -1.287 | 13.352 | 1.00 | 0.00 | TAG N   |
| ATOM | 367 | CA  | ARG | 22 | 9.602  | -1.672 | 12.555 | 1.00 | 0.00 | TAG C   |
| ATOM | 368 | C   | ARG | 22 | 10.636 | -0.571 | 12.538 | 1.00 | 0.00 | TAG C   |
| ATOM | 369 | O   | ARG | 22 | 11.749 | -0.792 | 12.926 | 1.00 | 0.00 | TAG O   |
| ATOM | 370 | CB  | ARG | 22 | 9.128  | -2.027 | 11.117 | 1.00 | 0.00 | TAG C   |
| ATOM | 371 | CG  | ARG | 22 | 10.240 | -2.520 | 10.149 | 1.00 | 0.00 | TAG C   |
| ATOM | 372 | CD  | ARG | 22 | 9.685  | -2.855 | 8.754  | 1.00 | 0.00 | TAG C   |
| ATOM | 373 | NE  | ARG | 22 | 10.803 | -3.261 | 7.853  | 1.00 | 0.00 | TAG N   |
| ATOM | 374 | CZ  | ARG | 22 | 11.299 | -4.490 | 7.748  | 1.00 | 0.00 | TAG C   |
| ATOM | 375 | NH1 | ARG | 22 | 10.853 | -5.508 | 8.430  | 1.00 | 0.00 | TAG N   |
| ATOM | 376 | NH2 | ARG | 22 | 12.279 | -4.691 | 6.925  | 1.00 | 0.00 | TAG N1+ |
| ATOM | 377 | H   | ARG | 22 | 7.774  | -0.647 | 12.944 | 1.00 | 0.00 | TAG H   |
| ATOM | 378 | HA  | ARG | 22 | 10.065 | -2.558 | 13.031 | 1.00 | 0.00 | TAG H   |
| ATOM | 379 | 2HB | ARG | 22 | 8.611  | -1.145 | 10.685 | 1.00 | 0.00 | TAG H   |
| ATOM | 380 | 3HB | ARG | 22 | 8.340  | -2.805 | 11.176 | 1.00 | 0.00 | TAG H   |
| ATOM | 381 | 2HG | ARG | 22 | 10.741 | -3.406 | 10.591 | 1.00 | 0.00 | TAG H   |
| ATOM | 382 | 3HG | ARG | 22 | 11.031 | -1.748 | 10.052 | 1.00 | 0.00 | TAG H   |
| ATOM | 383 | 2HD | ARG | 22 | 9.151  | -1.968 | 8.348  | 1.00 | 0.00 | TAG H   |
| ATOM | 384 | 3HD | ARG | 22 | 8.930  | -3.665 | 8.840  | 1.00 | 0.00 | TAG H   |
| ATOM | 385 | HE  | ARG | 22 | 11.266 | -2.577 | 7.246  | 1.00 | 0.00 | TAG H   |
| ATOM | 386 | H01 | ARG | 22 | 10.090 | -5.385 | 9.080  | 1.00 | 0.00 | TAG H   |
| ATOM | 387 | H02 | ARG | 22 | 11.270 | -6.420 | 8.308  | 1.00 | 0.00 | TAG H   |
| ATOM | 388 | H03 | ARG | 22 | 12.474 | -3.839 | 6.419  | 1.00 | 0.00 | TAG H   |
| ATOM | 389 | H04 | ARG | 22 | 12.028 | -5.420 | 6.273  | 1.00 | 0.00 | TAG H   |
| ATOM | 390 | H05 | ARG | 22 | 13.100 | -4.971 | 7.442  | 1.00 | 0.00 | TAG H   |
| ATOM | 391 | N   | GLY | 23 | 10.321 | 0.583  | 12.280 | 1.00 | 0.00 | TAG N   |
| ATOM | 392 | CA  | GLY | 23 | 11.224 | 1.724  | 12.164 | 1.00 | 0.00 | TAG C   |
| ATOM | 393 | C   | GLY | 23 | 12.412 | 1.388  | 11.296 | 1.00 | 0.00 | TAG C   |
| ATOM | 394 | O   | GLY | 23 | 13.469 | 2.035  | 11.393 | 1.00 | 0.00 | TAG O   |
| ATOM | 395 | H   | GLY | 23 | 9.343  | 0.763  | 12.133 | 1.00 | 0.00 | TAG H   |
| ATOM | 396 | 3HA | GLY | 23 | 11.558 | 1.980  | 13.126 | 0.00 | 0.00 | TAG H   |
| ATOM | 397 | HA  | GLY | 23 | 10.682 | 2.564  | 11.689 | 1.00 | 0.00 | TAG H   |
| ATOM | 398 | N   | TYR | 24 | 12.299 | 0.419  | 10.432 | 1.00 | 0.00 | TAG N   |
| ATOM | 399 | CA  | TYR | 24 | 13.306 | -0.016 | 9.468  | 1.00 | 0.00 | TAG C   |
| ATOM | 400 | C   | TYR | 24 | 14.314 | 1.078  | 9.209  | 1.00 | 0.00 | TAG C   |
| ATOM | 401 | O   | TYR | 24 | 14.047 | 2.261  | 9.158  | 1.00 | 0.00 | TAG O   |

|      |     |     |     |    |        |        |        |      |      |     |   |
|------|-----|-----|-----|----|--------|--------|--------|------|------|-----|---|
| ATOM | 402 | CB  | TYR | 24 | 12.647 | -0.393 | 8.109  | 1.00 | 0.00 | TAG | C |
| ATOM | 403 | CG  | TYR | 24 | 11.939 | 0.736  | 7.350  | 1.00 | 0.00 | TAG | C |
| ATOM | 404 | CD1 | TYR | 24 | 12.635 | 1.519  | 6.424  | 1.00 | 0.00 | TAG | C |
| ATOM | 405 | CD2 | TYR | 24 | 10.581 | 0.980  | 7.577  | 1.00 | 0.00 | TAG | C |
| ATOM | 406 | CE1 | TYR | 24 | 11.977 | 2.531  | 5.731  | 1.00 | 0.00 | TAG | C |
| ATOM | 407 | CE2 | TYR | 24 | 9.926  | 1.992  | 6.884  | 1.00 | 0.00 | TAG | C |
| ATOM | 408 | CZ  | TYR | 24 | 10.624 | 2.767  | 5.960  | 1.00 | 0.00 | TAG | C |
| ATOM | 409 | OH  | TYR | 24 | 9.982  | 3.760  | 5.276  | 1.00 | 0.00 | TAG | O |
| ATOM | 410 | OXT | TYR | 24 | 15.694 | 0.721  | 9.005  | 0.00 | 0.00 | TAG | O |
| ATOM | 411 | H   | TYR | 24 | 11.393 | -0.102 | 10.429 | 1.00 | 0.00 | TAG | H |
| ATOM | 412 | HA  | TYR | 24 | 13.848 | -0.886 | 9.883  | 1.00 | 0.00 | TAG | H |
| ATOM | 413 | 2HB | TYR | 24 | 11.908 | -1.204 | 8.266  | 1.00 | 0.00 | TAG | H |
| ATOM | 414 | 3HB | TYR | 24 | 13.407 | -0.862 | 7.450  | 1.00 | 0.00 | TAG | H |
| ATOM | 415 | 1HD | TYR | 24 | 13.685 | 1.338  | 6.235  | 1.00 | 0.00 | TAG | H |
| ATOM | 416 | 2HD | TYR | 24 | 10.030 | 0.375  | 8.284  | 1.00 | 0.00 | TAG | H |
| ATOM | 417 | 1HE | TYR | 24 | 12.512 | 3.133  | 5.011  | 1.00 | 0.00 | TAG | H |
| ATOM | 418 | 2HE | TYR | 24 | 8.875  | 2.167  | 7.063  | 1.00 | 0.00 | TAG | H |
| ATOM | 419 | HH  | TYR | 24 | 9.065  | 3.778  | 5.556  | 1.00 | 0.00 | TAG | H |
| ATOM | 420 | H01 | TYR | 24 | 15.981 | 1.030  | 8.143  | 0.00 | 0.00 | TAG | H |
| END  |     |     |     |    |        |        |        |      |      |     |   |

#### Histatin conformer 2:

|      |    |     |     |   |        |        |        |      |      |     |     |
|------|----|-----|-----|---|--------|--------|--------|------|------|-----|-----|
| ATOM | 1  | N   | ASP | 1 | -0.742 | -1.261 | -0.005 | 1.00 | 0.00 | TAG | N1+ |
| ATOM | 2  | CA  | ASP | 1 | -0.018 | 0.008  | 0.007  | 1.00 | 0.00 | TAG | C   |
| ATOM | 3  | C   | ASP | 1 | -0.973 | 1.176  | 0.003  | 1.00 | 0.00 | TAG | C   |
| ATOM | 4  | O   | ASP | 1 | -0.968 | 2.000  | 0.921  | 1.00 | 0.00 | TAG | O   |
| ATOM | 5  | CB  | ASP | 1 | 0.963  | 0.088  | -1.197 | 1.00 | 0.00 | TAG | C   |
| ATOM | 6  | CG  | ASP | 1 | 2.166  | -0.865 | -1.133 | 1.00 | 0.00 | TAG | C   |
| ATOM | 7  | OD1 | ASP | 1 | 1.969  | -2.097 | -1.177 | 1.00 | 0.00 | TAG | O   |
| ATOM | 8  | OD2 | ASP | 1 | 3.307  | -0.377 | -0.994 | 1.00 | 0.00 | TAG | O   |
| ATOM | 9  | HA  | ASP | 1 | 0.566  | 0.064  | 0.945  | 1.00 | 0.00 | TAG | H   |
| ATOM | 10 | 2HB | ASP | 1 | 1.353  | 1.117  | -1.298 | 1.00 | 0.00 | TAG | H   |
| ATOM | 11 | 3HB | ASP | 1 | 0.440  | -0.126 | -2.142 | 1.00 | 0.00 | TAG | H   |
| ATOM | 12 | H01 | ASP | 1 | 3.615  | -0.533 | -0.098 | 1.00 | 0.00 | TAG | H   |
| ATOM | 13 | H02 | ASP | 1 | -0.910 | -1.562 | 0.944  | 1.00 | 0.00 | TAG | H   |
| ATOM | 14 | H03 | ASP | 1 | -0.193 | -1.958 | -0.488 | 1.00 | 0.00 | TAG | H   |
| ATOM | 15 | H04 | ASP | 1 | -1.624 | -1.140 | -0.481 | 1.00 | 0.00 | TAG | H   |
| ATOM | 16 | N   | SER | 2 | -1.812 | 1.277  | -0.974 | 1.00 | 1.00 | TAG | N   |
| ATOM | 17 | CA  | SER | 2 | -2.731 | 2.404  | -1.133 | 1.00 | 1.00 | TAG | C   |
| ATOM | 18 | C   | SER | 2 | -4.196 | 2.006  | -1.232 | 1.00 | 1.00 | TAG | C   |
| ATOM | 19 | O   | SER | 2 | -5.154 | 2.587  | -0.745 | 1.00 | 1.00 | TAG | O   |
| ATOM | 20 | CB  | SER | 2 | -2.355 | 3.198  | -2.387 | 1.00 | 1.00 | TAG | C   |
| ATOM | 21 | OG  | SER | 2 | -3.316 | 4.204  | -2.646 | 1.00 | 1.00 | TAG | O   |
| ATOM | 22 | H   | SER | 2 | -1.894 | 0.591  | -1.698 | 1.00 | 1.00 | TAG | H   |
| ATOM | 23 | HA  | SER | 2 | -2.627 | 3.009  | -0.221 | 1.00 | 1.00 | TAG | H   |
| ATOM | 24 | 1HB | SER | 2 | -1.363 | 3.655  | -2.256 | 1.00 | 1.00 | TAG | H   |
| ATOM | 25 | 2HB | SER | 2 | -2.284 | 2.520  | -3.250 | 1.00 | 1.00 | TAG | H   |
| ATOM | 26 | HG  | SER | 2 | -3.054 | 4.713  | -3.466 | 1.00 | 1.00 | TAG | H   |
| ATOM | 27 | N   | HIS | 3 | -4.416 | 0.839  | -1.990 | 1.00 | 0.00 | TAG | N   |

|      |    |     |     |   |         |        |        |      |      |     |   |
|------|----|-----|-----|---|---------|--------|--------|------|------|-----|---|
| ATOM | 28 | CA  | HIS | 3 | -5.736  | 0.224  | -2.099 | 1.00 | 0.00 | TAG | C |
| ATOM | 29 | C   | HIS | 3 | -6.249  | -0.203 | -0.745 | 1.00 | 0.00 | TAG | C |
| ATOM | 30 | O   | HIS | 3 | -7.450  | -0.055 | -0.411 | 1.00 | 0.00 | TAG | O |
| ATOM | 31 | CB  | HIS | 3 | -5.571  | -0.996 | -3.019 | 1.00 | 0.00 | TAG | C |
| ATOM | 32 | CG  | HIS | 3 | -6.866  | -1.719 | -3.247 | 1.00 | 0.00 | TAG | C |
| ATOM | 33 | CD2 | HIS | 3 | -7.766  | -1.352 | -4.238 | 1.00 | 0.00 | TAG | C |
| ATOM | 34 | ND1 | HIS | 3 | -7.326  | -2.817 | -2.522 | 1.00 | 0.00 | TAG | N |
| ATOM | 35 | CE1 | HIS | 3 | -8.500  | -3.029 | -3.145 | 1.00 | 0.00 | TAG | C |
| ATOM | 36 | NE2 | HIS | 3 | -8.837  | -2.206 | -4.176 | 1.00 | 0.00 | TAG | N |
| ATOM | 37 | H   | HIS | 3 | -3.652  | 0.422  | -2.464 | 1.00 | 0.00 | TAG | H |
| ATOM | 38 | HA  | HIS | 3 | -6.433  | 0.994  | -2.472 | 1.00 | 0.00 | TAG | H |
| ATOM | 39 | 2HB | HIS | 3 | -4.846  | -1.721 | -2.597 | 1.00 | 0.00 | TAG | H |
| ATOM | 40 | 3HB | HIS | 3 | -5.162  | -0.718 | -4.014 | 1.00 | 0.00 | TAG | H |
| ATOM | 41 | 2HD | HIS | 3 | -7.619  | -0.526 | -4.927 | 1.00 | 0.00 | TAG | H |
| ATOM | 42 | 1HE | HIS | 3 | -9.114  | -3.847 | -2.793 | 1.00 | 0.00 | TAG | H |
| ATOM | 43 | 2HE | HIS | 3 | -9.682  | -2.215 | -4.765 | 1.00 | 0.00 | TAG | H |
| ATOM | 44 | N   | ALA | 4 | -5.364  | -0.719 | 0.106  | 1.00 | 1.00 | TAG | N |
| ATOM | 45 | CA  | ALA | 4 | -5.721  | -1.205 | 1.425  | 1.00 | 1.00 | TAG | C |
| ATOM | 46 | C   | ALA | 4 | -6.193  | -0.032 | 2.301  | 1.00 | 1.00 | TAG | C |
| ATOM | 47 | O   | ALA | 4 | -7.248  | -0.122 | 2.923  | 1.00 | 1.00 | TAG | O |
| ATOM | 48 | CB  | ALA | 4 | -4.511  | -1.885 | 2.062  | 1.00 | 1.00 | TAG | C |
| ATOM | 49 | H   | ALA | 4 | -4.394  | -0.823 | -0.113 | 1.00 | 1.00 | TAG | H |
| ATOM | 50 | HA  | ALA | 4 | -6.539  | -1.935 | 1.337  | 1.00 | 1.00 | TAG | H |
| ATOM | 51 | 1HB | ALA | 4 | -4.782  | -2.253 | 3.063  | 1.00 | 1.00 | TAG | H |
| ATOM | 52 | 2HB | ALA | 4 | -4.191  | -2.729 | 1.435  | 1.00 | 1.00 | TAG | H |
| ATOM | 53 | 3HB | ALA | 4 | -3.687  | -1.161 | 2.149  | 1.00 | 1.00 | TAG | H |
| ATOM | 54 | N   | LYS | 5 | -5.469  | 1.030  | 2.370  | 1.00 | 1.00 | TAG | N |
| ATOM | 55 | CA  | LYS | 5 | -5.870  | 2.211  | 3.124  | 1.00 | 1.00 | TAG | C |
| ATOM | 56 | C   | LYS | 5 | -7.191  | 2.751  | 2.591  | 1.00 | 1.00 | TAG | C |
| ATOM | 57 | O   | LYS | 5 | -7.957  | 3.338  | 3.335  | 1.00 | 1.00 | TAG | O |
| ATOM | 58 | CB  | LYS | 5 | -4.788  | 3.292  | 3.042  | 1.00 | 1.00 | TAG | C |
| ATOM | 59 | CG  | LYS | 5 | -3.563  | 2.974  | 3.862  | 1.00 | 1.00 | TAG | C |
| ATOM | 60 | CD  | LYS | 5 | -2.504  | 4.045  | 3.720  | 1.00 | 1.00 | TAG | C |
| ATOM | 61 | CE  | LYS | 5 | -1.275  | 3.659  | 4.537  | 1.00 | 1.00 | TAG | C |
| ATOM | 62 | NZ  | LYS | 5 | -0.103  | 4.532  | 4.269  | 1.00 | 1.00 | TAG | N |
| ATOM | 63 | H   | LYS | 5 | -4.584  | 1.122  | 1.914  | 1.00 | 1.00 | TAG | H |
| ATOM | 64 | HA  | LYS | 5 | -6.001  | 1.924  | 4.178  | 1.00 | 1.00 | TAG | H |
| ATOM | 65 | 1HB | LYS | 5 | -4.493  | 3.426  | 1.990  | 1.00 | 1.00 | TAG | H |
| ATOM | 66 | 2HB | LYS | 5 | -5.210  | 4.250  | 3.382  | 1.00 | 1.00 | TAG | H |
| ATOM | 67 | 1HG | LYS | 5 | -3.845  | 2.873  | 4.920  | 1.00 | 1.00 | TAG | H |
| ATOM | 68 | 2HG | LYS | 5 | -3.151  | 2.004  | 3.545  | 1.00 | 1.00 | TAG | H |
| ATOM | 69 | 1HD | LYS | 5 | -2.230  | 4.167  | 2.662  | 1.00 | 1.00 | TAG | H |
| ATOM | 70 | 2HD | LYS | 5 | -2.897  | 5.013  | 4.065  | 1.00 | 1.00 | TAG | H |
| ATOM | 71 | 1HE | LYS | 5 | -1.523  | 3.706  | 5.608  | 1.00 | 1.00 | TAG | H |
| ATOM | 72 | 2HE | LYS | 5 | -1.006  | 2.616  | 4.315  | 1.00 | 1.00 | TAG | H |
| ATOM | 73 | H01 | LYS | 5 | 0.144   | 5.033  | 5.111  | 1.00 | 1.00 | TAG | H |
| ATOM | 74 | H02 | LYS | 5 | -0.333  | 5.191  | 3.539  | 1.00 | 1.00 | TAG | H |
| ATOM | 75 | N   | ARG | 6 | -7.468  | 2.540  | 1.324  | 1.00 | 1.00 | TAG | N |
| ATOM | 76 | CA  | ARG | 6 | -8.708  | 3.009  | 0.679  | 1.00 | 1.00 | TAG | C |
| ATOM | 77 | C   | ARG | 6 | -9.908  | 2.245  | 1.217  | 1.00 | 1.00 | TAG | C |
| ATOM | 78 | O   | ARG | 6 | -10.874 | 2.847  | 1.709  | 1.00 | 1.00 | TAG | O |

|      |     |      |     |   |         |        |        |      |      |         |
|------|-----|------|-----|---|---------|--------|--------|------|------|---------|
| ATOM | 79  | CB   | ARG | 6 | -8.661  | 2.885  | -0.850 | 1.00 | 1.00 | TAG C   |
| ATOM | 80  | CG   | ARG | 6 | -7.667  | 3.791  | -1.518 | 1.00 | 1.00 | TAG C   |
| ATOM | 81  | CD   | ARG | 6 | -8.037  | 5.246  | -1.357 | 1.00 | 1.00 | TAG C   |
| ATOM | 82  | NE   | ARG | 6 | -6.856  | 6.090  | -1.505 | 1.00 | 1.00 | TAG N   |
| ATOM | 83  | CZ   | ARG | 6 | -6.862  | 7.313  | -2.023 | 1.00 | 1.00 | TAG C   |
| ATOM | 84  | NH1  | ARG | 6 | -7.988  | 7.832  | -2.518 | 1.00 | 1.00 | TAG N   |
| ATOM | 85  | NH2  | ARG | 6 | -5.721  | 7.994  | -2.105 | 1.00 | 1.00 | TAG N1+ |
| ATOM | 86  | H    | ARG | 6 | -6.856  | 2.047  | 0.706  | 1.00 | 1.00 | TAG H   |
| ATOM | 87  | HA   | ARG | 6 | -8.806  | 4.077  | 0.921  | 1.00 | 1.00 | TAG H   |
| ATOM | 88  | 1HB  | ARG | 6 | -8.424  | 1.844  | -1.114 | 1.00 | 1.00 | TAG H   |
| ATOM | 89  | 2HB  | ARG | 6 | -9.663  | 3.099  | -1.254 | 1.00 | 1.00 | TAG H   |
| ATOM | 90  | 1HG  | ARG | 6 | -6.668  | 3.617  | -1.092 | 1.00 | 1.00 | TAG H   |
| ATOM | 91  | 2HG  | ARG | 6 | -7.608  | 3.545  | -2.590 | 1.00 | 1.00 | TAG H   |
| ATOM | 92  | 1HD  | ARG | 6 | -8.791  | 5.525  | -2.107 | 1.00 | 1.00 | TAG H   |
| ATOM | 93  | 2HD  | ARG | 6 | -8.490  | 5.409  | -0.368 | 1.00 | 1.00 | TAG H   |
| ATOM | 94  | HE   | ARG | 6 | -5.979  | 5.722  | -1.195 | 1.00 | 1.00 | TAG H   |
| ATOM | 95  | 1HH1 | ARG | 6 | -8.835  | 7.300  | -2.501 | 1.00 | 1.00 | TAG H   |
| ATOM | 96  | 2HH1 | ARG | 6 | -7.985  | 8.754  | -2.906 | 1.00 | 1.00 | TAG H   |
| ATOM | 97  | H01  | ARG | 6 | -5.439  | 8.292  | -1.182 | 1.00 | 1.00 | TAG H   |
| ATOM | 98  | H02  | ARG | 6 | -5.853  | 8.803  | -2.695 | 1.00 | 1.00 | TAG H   |
| ATOM | 99  | H03  | ARG | 6 | -5.004  | 7.402  | -2.500 | 1.00 | 1.00 | TAG H   |
| ATOM | 100 | N    | HIS | 7 | -9.901  | 0.877  | 1.143  | 1.00 | 0.00 | TAG N   |
| ATOM | 101 | CA   | HIS | 7 | -11.086 | 0.117  | 1.530  | 1.00 | 0.00 | TAG C   |
| ATOM | 102 | C    | HIS | 7 | -10.739 | -0.951 | 2.539  | 1.00 | 0.00 | TAG C   |
| ATOM | 103 | O    | HIS | 7 | -11.681 | -1.463 | 3.238  | 1.00 | 0.00 | TAG O   |
| ATOM | 104 | CB   | HIS | 7 | -11.632 | -0.519 | 0.241  | 1.00 | 0.00 | TAG C   |
| ATOM | 105 | CG   | HIS | 7 | -12.019 | 0.508  | -0.782 | 1.00 | 0.00 | TAG C   |
| ATOM | 106 | CD2  | HIS | 7 | -11.263 | 0.757  | -1.919 | 1.00 | 0.00 | TAG C   |
| ATOM | 107 | ND1  | HIS | 7 | -13.149 | 1.322  | -0.734 | 1.00 | 0.00 | TAG N   |
| ATOM | 108 | CE1  | HIS | 7 | -12.979 | 2.020  | -1.872 | 1.00 | 0.00 | TAG C   |
| ATOM | 109 | NE2  | HIS | 7 | -11.887 | 1.745  | -2.636 | 1.00 | 0.00 | TAG N   |
| ATOM | 110 | H    | HIS | 7 | -9.099  | 0.408  | 0.829  | 1.00 | 0.00 | TAG H   |
| ATOM | 111 | HA   | HIS | 7 | -11.780 | 0.813  | 2.033  | 1.00 | 0.00 | TAG H   |
| ATOM | 112 | 2HB  | HIS | 7 | -12.523 | -1.145 | 0.449  | 1.00 | 0.00 | TAG H   |
| ATOM | 113 | 3HB  | HIS | 7 | -10.897 | -1.203 | -0.231 | 1.00 | 0.00 | TAG H   |
| ATOM | 114 | 2HD  | HIS | 7 | -10.340 | 0.241  | -2.169 | 1.00 | 0.00 | TAG H   |
| ATOM | 115 | 1HE  | HIS | 7 | -13.725 | 2.763  | -2.121 | 1.00 | 0.00 | TAG H   |
| ATOM | 116 | 2HE  | HIS | 7 | -11.594 | 2.169  | -3.528 | 1.00 | 0.00 | TAG H   |
| ATOM | 117 | N    | HIS | 8 | -9.444  | -1.344 | 2.755  | 1.00 | 0.00 | TAG N   |
| ATOM | 118 | CA   | HIS | 8 | -9.153  | -2.419 | 3.700  | 1.00 | 0.00 | TAG C   |
| ATOM | 119 | C    | HIS | 8 | -8.439  | -1.889 | 4.920  | 1.00 | 0.00 | TAG C   |
| ATOM | 120 | O    | HIS | 8 | -8.326  | -2.668 | 5.925  | 1.00 | 0.00 | TAG O   |
| ATOM | 121 | CB   | HIS | 8 | -8.263  | -3.424 | 2.951  | 1.00 | 0.00 | TAG C   |
| ATOM | 122 | CG   | HIS | 8 | -8.999  | -4.127 | 1.849  | 1.00 | 0.00 | TAG C   |
| ATOM | 123 | CD2  | HIS | 8 | -10.372 | -4.014 | 1.672  | 1.00 | 0.00 | TAG C   |
| ATOM | 124 | ND1  | HIS | 8 | -8.429  | -4.957 | 0.886  | 1.00 | 0.00 | TAG N   |
| ATOM | 125 | CE1  | HIS | 8 | -9.530  | -5.293 | 0.190  | 1.00 | 0.00 | TAG C   |
| ATOM | 126 | NE2  | HIS | 8 | -10.723 | -4.775 | 0.587  | 1.00 | 0.00 | TAG N   |
| ATOM | 127 | H    | HIS | 8 | -8.720  | -0.898 | 2.265  | 1.00 | 0.00 | TAG H   |
| ATOM | 128 | HA   | HIS | 8 | -10.117 | -2.825 | 4.051  | 1.00 | 0.00 | TAG H   |
| ATOM | 129 | 2HB  | HIS | 8 | -7.863  | -4.195 | 3.639  | 1.00 | 0.00 | TAG H   |

|      |     |     |     |    |         |        |        |      |      |     |   |
|------|-----|-----|-----|----|---------|--------|--------|------|------|-----|---|
| ATOM | 130 | 3HB | HIS | 8  | -7.370  | -2.939 | 2.504  | 1.00 | 0.00 | TAG | H |
| ATOM | 131 | 2HD | HIS | 8  | -11.026 | -3.418 | 2.302  | 1.00 | 0.00 | TAG | H |
| ATOM | 132 | 1HE | HIS | 8  | -9.405  | -5.958 | -0.655 | 1.00 | 0.00 | TAG | H |
| ATOM | 133 | 2HE | HIS | 8  | -11.660 | -4.915 | 0.183  | 1.00 | 0.00 | TAG | H |
| ATOM | 134 | N   | GLY | 9  | -8.157  | -0.551 | 4.940  | 1.00 | 1.00 | TAG | N |
| ATOM | 135 | CA  | GLY | 9  | -7.411  | 0.121  | 6.019  | 1.00 | 1.00 | TAG | C |
| ATOM | 136 | C01 | GLY | 9  | -6.073  | -0.582 | 6.408  | 1.00 | 1.00 | TAG | C |
| ATOM | 137 | O01 | GLY | 9  | -5.339  | 0.364  | 7.190  | 1.00 | 1.00 | TAG | O |
| ATOM | 138 | H   | GLY | 9  | -8.437  | 0.061  | 4.200  | 1.00 | 1.00 | TAG | H |
| ATOM | 139 | 1HA | GLY | 9  | -7.192  | 1.153  | 5.709  | 1.00 | 1.00 | TAG | H |
| ATOM | 140 | 2HA | GLY | 9  | -8.055  | 0.183  | 6.909  | 1.00 | 1.00 | TAG | H |
| ATOM | 141 | N   | TYR | 10 | -5.312  | -0.890 | 5.371  | 1.00 | 0.00 | TAG | N |
| ATOM | 142 | CA  | TYR | 10 | -4.092  | -1.652 | 5.624  | 1.00 | 0.00 | TAG | C |
| ATOM | 143 | C   | TYR | 10 | -4.010  | -2.076 | 7.070  | 1.00 | 0.00 | TAG | C |
| ATOM | 144 | O   | TYR | 10 | -2.940  | -2.268 | 7.604  | 1.00 | 0.00 | TAG | O |
| ATOM | 145 | CB  | TYR | 10 | -2.829  | -0.801 | 5.301  | 1.00 | 0.00 | TAG | C |
| ATOM | 146 | CG  | TYR | 10 | -1.470  | -1.479 | 5.512  | 1.00 | 0.00 | TAG | C |
| ATOM | 147 | CD1 | TYR | 10 | -0.981  | -2.400 | 4.580  | 1.00 | 0.00 | TAG | C |
| ATOM | 148 | CD2 | TYR | 10 | -0.707  | -1.168 | 6.641  | 1.00 | 0.00 | TAG | C |
| ATOM | 149 | CE1 | TYR | 10 | 0.261   | -2.998 | 4.776  | 1.00 | 0.00 | TAG | C |
| ATOM | 150 | CE2 | TYR | 10 | 0.534   | -1.767 | 6.834  | 1.00 | 0.00 | TAG | C |
| ATOM | 151 | CZ  | TYR | 10 | 1.018   | -2.682 | 5.901  | 1.00 | 0.00 | TAG | C |
| ATOM | 152 | OH  | TYR | 10 | 2.237   | -3.268 | 6.088  | 1.00 | 0.00 | TAG | O |
| ATOM | 153 | H   | TYR | 10 | -5.394  | -0.718 | 4.421  | 1.00 | 0.00 | TAG | H |
| ATOM | 154 | HA  | TYR | 10 | -4.105  | -2.566 | 5.002  | 1.00 | 0.00 | TAG | H |
| ATOM | 155 | 2HB | TYR | 10 | -2.838  | 0.125  | 5.910  | 1.00 | 0.00 | TAG | H |
| ATOM | 156 | 3HB | TYR | 10 | -2.897  | -0.424 | 4.259  | 1.00 | 0.00 | TAG | H |
| ATOM | 157 | 1HD | TYR | 10 | -1.559  | -2.647 | 3.701  | 1.00 | 0.00 | TAG | H |
| ATOM | 158 | 2HD | TYR | 10 | -1.071  | -0.450 | 7.363  | 1.00 | 0.00 | TAG | H |
| ATOM | 159 | 1HE | TYR | 10 | 0.644   | -3.704 | 4.054  | 1.00 | 0.00 | TAG | H |
| ATOM | 160 | 2HE | TYR | 10 | 1.117   | -1.513 | 7.707  | 1.00 | 0.00 | TAG | H |
| ATOM | 161 | HH  | TYR | 10 | 2.613   | -2.934 | 6.905  | 1.00 | 0.00 | TAG | H |
| ATOM | 162 | CA  | LYS | 11 | -5.024  | -2.727 | 9.133  | 1.00 | 1.00 | TAG | C |
| ATOM | 163 | C   | LYS | 11 | -4.441  | -4.126 | 9.176  | 1.00 | 1.00 | TAG | C |
| ATOM | 164 | O   | LYS | 11 | -4.397  | -4.725 | 10.261 | 1.00 | 1.00 | TAG | O |
| ATOM | 165 | CB  | LYS | 11 | -6.451  | -2.727 | 9.684  | 1.00 | 1.00 | TAG | C |
| ATOM | 166 | CG  | LYS | 11 | -6.577  | -3.161 | 11.130 | 1.00 | 1.00 | TAG | C |
| ATOM | 167 | CD  | LYS | 11 | -7.850  | -2.583 | 11.720 | 1.00 | 1.00 | TAG | C |
| ATOM | 168 | CE  | LYS | 11 | -8.063  | -3.002 | 13.161 | 1.00 | 1.00 | TAG | C |
| ATOM | 169 | NZ  | LYS | 11 | -8.585  | -4.384 | 13.222 | 1.00 | 1.00 | TAG | N |
| ATOM | 170 | N01 | LYS | 11 | -5.192  | -1.941 | 7.792  | 1.00 | 1.00 | TAG | N |
| ATOM | 171 | HA  | LYS | 11 | -4.407  | -2.064 | 9.757  | 1.00 | 1.00 | TAG | H |
| ATOM | 172 | 1HB | LYS | 11 | -6.867  | -1.714 | 9.583  | 1.00 | 1.00 | TAG | H |
| ATOM | 173 | 2HB | LYS | 11 | -7.068  | -3.392 | 9.062  | 1.00 | 1.00 | TAG | H |
| ATOM | 174 | 1HG | LYS | 11 | -6.595  | -4.259 | 11.195 | 1.00 | 1.00 | TAG | H |
| ATOM | 175 | 2HG | LYS | 11 | -5.704  | -2.819 | 11.705 | 1.00 | 1.00 | TAG | H |
| ATOM | 176 | 1HD | LYS | 11 | -7.812  | -1.485 | 11.663 | 1.00 | 1.00 | TAG | H |
| ATOM | 177 | 2HD | LYS | 11 | -8.711  | -2.906 | 11.116 | 1.00 | 1.00 | TAG | H |
| ATOM | 178 | 1HE | LYS | 11 | -7.115  | -2.936 | 13.714 | 1.00 | 1.00 | TAG | H |
| ATOM | 179 | 2HE | LYS | 11 | -8.768  | -2.314 | 13.650 | 1.00 | 1.00 | TAG | H |
| ATOM | 180 | H01 | LYS | 11 | -6.011  | -1.423 | 7.508  | 1.00 | 1.00 | TAG | H |

|      |     |      |     |    |        |        |        |      |      |     |     |
|------|-----|------|-----|----|--------|--------|--------|------|------|-----|-----|
| ATOM | 181 | H02  | LYS | 11 | -8.698 | -4.659 | 14.187 | 1.00 | 1.00 | TAG | H   |
| ATOM | 182 | H03  | LYS | 11 | -7.936 | -5.010 | 12.767 | 1.00 | 1.00 | TAG | H   |
| ATOM | 183 | N    | ARG | 12 | -4.009 | -4.690 | 8.161  | 1.00 | 1.00 | TAG | N   |
| ATOM | 184 | CA   | ARG | 12 | -3.435 | -6.024 | 8.100  | 1.00 | 1.00 | TAG | C   |
| ATOM | 185 | C    | ARG | 12 | -2.534 | -6.059 | 9.332  | 1.00 | 1.00 | TAG | C   |
| ATOM | 186 | O    | ARG | 12 | -2.608 | -7.238 | 9.991  | 1.00 | 1.00 | TAG | O   |
| ATOM | 187 | CB   | ARG | 12 | -2.631 | -6.161 | 6.803  | 1.00 | 1.00 | TAG | C   |
| ATOM | 188 | CG   | ARG | 12 | -2.006 | -7.536 | 6.581  | 1.00 | 1.00 | TAG | C   |
| ATOM | 189 | CD   | ARG | 12 | -1.536 | -7.710 | 5.143  | 1.00 | 1.00 | TAG | C   |
| ATOM | 190 | NE   | ARG | 12 | -0.884 | -6.506 | 4.633  | 1.00 | 1.00 | TAG | N   |
| ATOM | 191 | CZ   | ARG | 12 | -1.163 | -5.940 | 3.460  | 1.00 | 1.00 | TAG | C   |
| ATOM | 192 | NH1  | ARG | 12 | -2.085 | -6.471 | 2.660  | 1.00 | 1.00 | TAG | N   |
| ATOM | 193 | NH2  | ARG | 12 | -0.532 | -4.827 | 3.096  | 1.00 | 1.00 | TAG | N1+ |
| ATOM | 194 | H    | ARG | 12 | -4.026 | -4.244 | 7.266  | 1.00 | 1.00 | TAG | H   |
| ATOM | 195 | HA   | ARG | 12 | -4.168 | -6.843 | 8.096  | 1.00 | 1.00 | TAG | H   |
| ATOM | 196 | 1HB  | ARG | 12 | -3.290 | -5.932 | 5.953  | 1.00 | 1.00 | TAG | H   |
| ATOM | 197 | 2HB  | ARG | 12 | -1.831 | -5.406 | 6.803  | 1.00 | 1.00 | TAG | H   |
| ATOM | 198 | 1HG  | ARG | 12 | -1.155 | -7.669 | 7.265  | 1.00 | 1.00 | TAG | H   |
| ATOM | 199 | 2HG  | ARG | 12 | -2.740 | -8.318 | 6.826  | 1.00 | 1.00 | TAG | H   |
| ATOM | 200 | 1HD  | ARG | 12 | -0.836 | -8.557 | 5.086  | 1.00 | 1.00 | TAG | H   |
| ATOM | 201 | 2HD  | ARG | 12 | -2.396 | -7.959 | 4.504  | 1.00 | 1.00 | TAG | H   |
| ATOM | 202 | HE   | ARG | 12 | -0.181 | -6.078 | 5.203  | 1.00 | 1.00 | TAG | H   |
| ATOM | 203 | 1HH1 | ARG | 12 | -2.571 | -7.299 | 2.938  | 1.00 | 1.00 | TAG | H   |
| ATOM | 204 | 2HH1 | ARG | 12 | -2.290 | -6.042 | 1.780  | 1.00 | 1.00 | TAG | H   |
| ATOM | 205 | H01  | ARG | 12 | -0.405 | -4.232 | 3.902  | 1.00 | 1.00 | TAG | H   |
| ATOM | 206 | H02  | ARG | 12 | -1.080 | -4.340 | 2.401  | 1.00 | 1.00 | TAG | H   |
| ATOM | 207 | H03  | ARG | 12 | 0.370  | -5.064 | 2.707  | 1.00 | 1.00 | TAG | H   |
| ATOM | 208 | N    | LYS | 13 | -1.684 | -5.305 | 9.649  | 1.00 | 0.00 | TAG | N   |
| ATOM | 209 | CA   | LYS | 13 | -0.703 | -5.502 | 10.713 | 1.00 | 0.00 | TAG | C   |
| ATOM | 210 | C    | LYS | 13 | -1.377 | -5.908 | 12.002 | 1.00 | 0.00 | TAG | C   |
| ATOM | 211 | O    | LYS | 13 | -0.833 | -6.729 | 12.749 | 1.00 | 0.00 | TAG | O   |
| ATOM | 212 | CB   | LYS | 13 | 0.121  | -4.199 | 10.903 | 1.00 | 0.00 | TAG | C   |
| ATOM | 213 | CG   | LYS | 13 | 1.283  | -4.348 | 11.917 | 1.00 | 0.00 | TAG | C   |
| ATOM | 214 | CD   | LYS | 13 | 2.121  | -3.084 | 12.127 | 1.00 | 0.00 | TAG | C   |
| ATOM | 215 | CE   | LYS | 13 | 2.944  | -2.807 | 10.862 | 1.00 | 0.00 | TAG | C   |
| ATOM | 216 | NZ   | LYS | 13 | 3.809  | -1.636 | 11.087 | 1.00 | 0.00 | TAG | N   |
| ATOM | 217 | H    | LYS | 13 | -1.629 | -4.449 | 9.141  | 1.00 | 0.00 | TAG | H   |
| ATOM | 218 | HA   | LYS | 13 | -0.028 | -6.326 | 10.417 | 1.00 | 0.00 | TAG | H   |
| ATOM | 219 | 2HB  | LYS | 13 | -0.552 | -3.375 | 11.219 | 1.00 | 0.00 | TAG | H   |
| ATOM | 220 | 3HB  | LYS | 13 | 0.532  | -3.872 | 9.928  | 1.00 | 0.00 | TAG | H   |
| ATOM | 221 | 2HG  | LYS | 13 | 1.937  | -5.188 | 11.612 | 1.00 | 0.00 | TAG | H   |
| ATOM | 222 | 3HG  | LYS | 13 | 0.888  | -4.629 | 12.912 | 1.00 | 0.00 | TAG | H   |
| ATOM | 223 | 2HD  | LYS | 13 | 2.793  | -3.219 | 12.999 | 1.00 | 0.00 | TAG | H   |
| ATOM | 224 | 3HD  | LYS | 13 | 1.458  | -2.231 | 12.373 | 1.00 | 0.00 | TAG | H   |
| ATOM | 225 | 2HE  | LYS | 13 | 2.286  | -2.620 | 9.989  | 1.00 | 0.00 | TAG | H   |
| ATOM | 226 | 3HE  | LYS | 13 | 3.556  | -3.695 | 10.595 | 1.00 | 0.00 | TAG | H   |
| ATOM | 227 | H01  | LYS | 13 | 4.024  | -1.559 | 12.071 | 1.00 | 0.00 | TAG | H   |
| ATOM | 228 | H02  | LYS | 13 | 3.333  | -0.800 | 10.779 | 1.00 | 0.00 | TAG | H   |
| ATOM | 229 | N    | PHE | 14 | -2.508 | -5.393 | 12.334 | 1.00 | 1.00 | TAG | N   |
| ATOM | 230 | CA   | PHE | 14 | -3.217 | -5.726 | 13.569 | 1.00 | 1.00 | TAG | C   |
| ATOM | 231 | C    | PHE | 14 | -4.433 | -6.617 | 13.339 | 1.00 | 1.00 | TAG | C   |

|      |     |     |     |    |         |         |        |      |      |     |   |
|------|-----|-----|-----|----|---------|---------|--------|------|------|-----|---|
| ATOM | 232 | O   | PHE | 14 | -4.730  | -7.487  | 14.162 | 1.00 | 1.00 | TAG | O |
| ATOM | 233 | CB  | PHE | 14 | -3.591  | -4.465  | 14.348 | 1.00 | 1.00 | TAG | C |
| ATOM | 234 | CG  | PHE | 14 | -2.401  | -3.652  | 14.780 | 1.00 | 1.00 | TAG | C |
| ATOM | 235 | CD1 | PHE | 14 | -2.176  | -2.386  | 14.247 | 1.00 | 1.00 | TAG | C |
| ATOM | 236 | CD2 | PHE | 14 | -1.486  | -4.166  | 15.708 | 1.00 | 1.00 | TAG | C |
| ATOM | 237 | CE1 | PHE | 14 | -1.065  | -1.633  | 14.638 | 1.00 | 1.00 | TAG | C |
| ATOM | 238 | CE2 | PHE | 14 | -0.374  | -3.422  | 16.110 | 1.00 | 1.00 | TAG | C |
| ATOM | 239 | CZ  | PHE | 14 | -0.162  | -2.152  | 15.574 | 1.00 | 1.00 | TAG | C |
| ATOM | 240 | H   | PHE | 14 | -2.991  | -4.727  | 11.766 | 1.00 | 1.00 | TAG | H |
| ATOM | 241 | HA  | PHE | 14 | -2.517  | -6.316  | 14.180 | 1.00 | 1.00 | TAG | H |
| ATOM | 242 | 1HB | PHE | 14 | -4.246  | -3.838  | 13.724 | 1.00 | 1.00 | TAG | H |
| ATOM | 243 | 2HB | PHE | 14 | -4.172  | -4.751  | 15.237 | 1.00 | 1.00 | TAG | H |
| ATOM | 244 | HD1 | PHE | 14 | -2.881  | -1.974  | 13.510 | 1.00 | 1.00 | TAG | H |
| ATOM | 245 | HD2 | PHE | 14 | -1.646  | -5.171  | 16.127 | 1.00 | 1.00 | TAG | H |
| ATOM | 246 | HE1 | PHE | 14 | -0.901  | -0.632  | 14.210 | 1.00 | 1.00 | TAG | H |
| ATOM | 247 | HE2 | PHE | 14 | 0.331   | -3.836  | 16.846 | 1.00 | 1.00 | TAG | H |
| ATOM | 248 | HZ  | PHE | 14 | 0.711   | -1.561  | 15.886 | 1.00 | 1.00 | TAG | H |
| ATOM | 249 | N   | HIS | 15 | -5.117  | -6.408  | 12.218 | 1.00 | 1.00 | TAG | N |
| ATOM | 250 | CA  | HIS | 15 | -6.235  | -7.286  | 11.799 | 1.00 | 1.00 | TAG | C |
| ATOM | 251 | C   | HIS | 15 | -5.950  | -7.844  | 10.423 | 1.00 | 1.00 | TAG | C |
| ATOM | 252 | O   | HIS | 15 | -6.821  | -7.769  | 9.518  | 1.00 | 1.00 | TAG | O |
| ATOM | 253 | CB  | HIS | 15 | -7.551  | -6.321  | 11.759 | 1.00 | 1.00 | TAG | C |
| ATOM | 254 | CG  | HIS | 15 | -8.658  | -7.194  | 11.214 | 1.00 | 1.00 | TAG | C |
| ATOM | 255 | CD2 | HIS | 15 | -9.312  | -8.224  | 11.783 | 1.00 | 1.00 | TAG | C |
| ATOM | 256 | ND1 | HIS | 15 | -9.302  | -7.004  | 9.999  | 1.00 | 1.00 | TAG | N |
| ATOM | 257 | CE1 | HIS | 15 | -10.214 | -8.009  | 9.898  | 1.00 | 1.00 | TAG | C |
| ATOM | 258 | NE2 | HIS | 15 | -10.262 | -8.713  | 11.028 | 1.00 | 1.00 | TAG | N |
| ATOM | 259 | H   | HIS | 15 | -4.931  | -5.654  | 11.588 | 1.00 | 1.00 | TAG | H |
| ATOM | 260 | HA  | HIS | 15 | -6.378  | -8.138  | 12.481 | 1.00 | 1.00 | TAG | H |
| ATOM | 261 | 1HB | HIS | 15 | -7.800  | -5.943  | 12.763 | 1.00 | 1.00 | TAG | H |
| ATOM | 262 | 2HB | HIS | 15 | -7.383  | -5.444  | 11.118 | 1.00 | 1.00 | TAG | H |
| ATOM | 263 | HD1 | HIS | 15 | -9.131  | -6.277  | 9.334  | 1.00 | 1.00 | TAG | H |
| ATOM | 264 | HD2 | HIS | 15 | -9.072  | -8.615  | 12.783 | 1.00 | 1.00 | TAG | H |
| ATOM | 265 | HE1 | HIS | 15 | -10.827 | -8.212  | 9.008  | 1.00 | 1.00 | TAG | H |
| ATOM | 266 | N   | GLU | 16 | -4.781  | -8.395  | 10.176 | 1.00 | 0.00 | TAG | N |
| ATOM | 267 | CA  | GLU | 16 | -4.461  | -9.077  | 8.926  | 1.00 | 0.00 | TAG | C |
| ATOM | 268 | C   | GLU | 16 | -5.285  | -10.332 | 8.769  | 1.00 | 0.00 | TAG | C |
| ATOM | 269 | O   | GLU | 16 | -5.038  | -11.119 | 7.849  | 1.00 | 0.00 | TAG | O |
| ATOM | 270 | CB  | GLU | 16 | -2.943  | -9.416  | 8.885  | 1.00 | 0.00 | TAG | C |
| ATOM | 271 | CG  | GLU | 16 | -2.458  | -10.479 | 9.923  | 1.00 | 0.00 | TAG | C |
| ATOM | 272 | CD  | GLU | 16 | -0.973  | -10.779 | 10.008 | 1.00 | 0.00 | TAG | C |
| ATOM | 273 | OE1 | GLU | 16 | -0.153  | -10.158 | 9.303  | 1.00 | 0.00 | TAG | O |
| ATOM | 274 | OE2 | GLU | 16 | -0.627  | -11.659 | 10.823 | 1.00 | 0.00 | TAG | O |
| ATOM | 275 | H   | GLU | 16 | -4.077  | -8.343  | 10.879 | 1.00 | 0.00 | TAG | H |
| ATOM | 276 | HA  | GLU | 16 | -4.703  | -8.405  | 8.083  | 1.00 | 0.00 | TAG | H |
| ATOM | 277 | 2HB | GLU | 16 | -2.349  | -8.490  | 9.029  | 1.00 | 0.00 | TAG | H |
| ATOM | 278 | 3HB | GLU | 16 | -2.661  | -9.767  | 7.874  | 1.00 | 0.00 | TAG | H |
| ATOM | 279 | 2HG | GLU | 16 | -2.960  | -11.447 | 9.767  | 1.00 | 0.00 | TAG | H |
| ATOM | 280 | 3HG | GLU | 16 | -2.709  | -10.177 | 10.953 | 1.00 | 0.00 | TAG | H |
| ATOM | 281 | H01 | GLU | 16 | -0.432  | -12.473 | 10.353 | 1.00 | 0.00 | TAG | H |
| ATOM | 282 | N   | LYS | 17 | -6.235  | -10.560 | 9.650  | 1.00 | 1.00 | TAG | N |



|      |     |     |     |    |         |         |        |      |      |         |
|------|-----|-----|-----|----|---------|---------|--------|------|------|---------|
| ATOM | 283 | CA  | LYS | 17 | -6.978  | -11.813 | 9.729  | 1.00 | 1.00 | TAG C   |
| ATOM | 284 | C   | LYS | 17 | -8.079  | -11.819 | 8.688  | 1.00 | 1.00 | TAG C   |
| ATOM | 285 | O   | LYS | 17 | -8.369  | -12.859 | 8.088  | 1.00 | 1.00 | TAG O   |
| ATOM | 286 | CB  | LYS | 17 | -7.569  | -11.984 | 11.130 | 1.00 | 1.00 | TAG C   |
| ATOM | 287 | CG  | LYS | 17 | -8.316  | -13.281 | 11.353 | 1.00 | 1.00 | TAG C   |
| ATOM | 288 | CD  | LYS | 17 | -8.333  | -13.602 | 12.837 | 1.00 | 1.00 | TAG C   |
| ATOM | 289 | CE  | LYS | 17 | -9.095  | -14.876 | 13.146 | 1.00 | 1.00 | TAG C   |
| ATOM | 290 | NZ  | LYS | 17 | -10.550 | -14.626 | 13.118 | 1.00 | 1.00 | TAG N1+ |
| ATOM | 291 | H   | LYS | 17 | -6.524  | -9.884  | 10.328 | 1.00 | 1.00 | TAG H   |
| ATOM | 292 | HA  | LYS | 17 | -6.296  | -12.653 | 9.532  | 1.00 | 1.00 | TAG H   |
| ATOM | 293 | 1HB | LYS | 17 | -6.755  | -11.915 | 11.867 | 1.00 | 1.00 | TAG H   |
| ATOM | 294 | 2HB | LYS | 17 | -8.253  | -11.145 | 11.328 | 1.00 | 1.00 | TAG H   |
| ATOM | 295 | 1HG | LYS | 17 | -9.345  | -13.196 | 10.973 | 1.00 | 1.00 | TAG H   |
| ATOM | 296 | 2HG | LYS | 17 | -7.834  | -14.097 | 10.794 | 1.00 | 1.00 | TAG H   |
| ATOM | 297 | 1HD | LYS | 17 | -7.299  | -13.700 | 13.200 | 1.00 | 1.00 | TAG H   |
| ATOM | 298 | 2HD | LYS | 17 | -8.788  | -12.764 | 13.386 | 1.00 | 1.00 | TAG H   |
| ATOM | 299 | 1HE | LYS | 17 | -8.836  | -15.654 | 12.412 | 1.00 | 1.00 | TAG H   |
| ATOM | 300 | 2HE | LYS | 17 | -8.801  | -15.258 | 14.135 | 1.00 | 1.00 | TAG H   |
| ATOM | 301 | 1HZ | LYS | 17 | -11.004 | -15.213 | 13.789 | 1.00 | 1.00 | TAG H   |
| ATOM | 302 | 2HZ | LYS | 17 | -10.729 | -13.668 | 13.340 | 1.00 | 1.00 | TAG H   |
| ATOM | 303 | 3HZ | LYS | 17 | -10.907 | -14.828 | 12.205 | 1.00 | 1.00 | TAG H   |
| ATOM | 304 | N   | HIS | 18 | -8.574  | -10.671 | 8.316  | 1.00 | 1.00 | TAG N   |
| ATOM | 305 | CA  | HIS | 18 | -9.668  | -10.511 | 7.329  | 1.00 | 1.00 | TAG C   |
| ATOM | 306 | C   | HIS | 18 | -9.215  | -11.031 | 5.984  | 1.00 | 1.00 | TAG C   |
| ATOM | 307 | CB  | HIS | 18 | -9.947  | -8.905  | 7.252  | 1.00 | 1.00 | TAG C   |
| ATOM | 308 | CG  | HIS | 18 | -10.976 | -8.738  | 6.156  | 1.00 | 1.00 | TAG C   |
| ATOM | 309 | CD2 | HIS | 18 | -10.761 | -8.088  | 4.949  | 1.00 | 1.00 | TAG C   |
| ATOM | 310 | ND1 | HIS | 18 | -12.281 | -9.065  | 6.134  | 1.00 | 1.00 | TAG N   |
| ATOM | 311 | CE1 | HIS | 18 | -12.884 | -8.720  | 5.026  | 1.00 | 1.00 | TAG C   |
| ATOM | 312 | NE2 | HIS | 18 | -11.934 | -8.180  | 4.262  | 1.00 | 1.00 | TAG N   |
| ATOM | 313 | O01 | HIS | 18 | -9.085  | -9.893  | 5.128  | 1.00 | 1.00 | TAG O   |
| ATOM | 314 | H   | HIS | 18 | -8.243  | -9.800  | 8.678  | 1.00 | 1.00 | TAG H   |
| ATOM | 315 | HA  | HIS | 18 | -10.573 | -11.067 | 7.613  | 1.00 | 1.00 | TAG H   |
| ATOM | 316 | 1HB | HIS | 18 | -10.321 | -8.519  | 8.212  | 1.00 | 1.00 | TAG H   |
| ATOM | 317 | 2HB | HIS | 18 | -9.025  | -8.351  | 7.020  | 1.00 | 1.00 | TAG H   |
| ATOM | 318 | HD1 | HIS | 18 | -12.744 | -9.526  | 6.891  | 1.00 | 1.00 | TAG H   |
| ATOM | 319 | HD2 | HIS | 18 | -9.834  | -7.599  | 4.615  | 1.00 | 1.00 | TAG H   |
| ATOM | 320 | HE1 | HIS | 18 | -13.948 | -8.848  | 4.778  | 1.00 | 1.00 | TAG H   |
| ATOM | 321 | N   | HIS | 19 | -8.098  | -11.717 | 5.871  | 1.00 | 0.00 | TAG N   |
| ATOM | 322 | CA  | HIS | 19 | -7.530  | -12.232 | 4.628  | 1.00 | 0.00 | TAG C   |
| ATOM | 323 | C   | HIS | 19 | -8.463  | -11.992 | 3.466  | 1.00 | 0.00 | TAG C   |
| ATOM | 324 | O   | HIS | 19 | -8.093  | -11.943 | 2.245  | 1.00 | 0.00 | TAG O   |
| ATOM | 325 | CB  | HIS | 19 | -7.316  | -13.739 | 4.842  | 1.00 | 0.00 | TAG C   |
| ATOM | 326 | CG  | HIS | 19 | -8.610  | -14.479 | 5.021  | 1.00 | 0.00 | TAG C   |
| ATOM | 327 | CD2 | HIS | 19 | -9.208  | -15.202 | 3.998  | 1.00 | 0.00 | TAG C   |
| ATOM | 328 | ND1 | HIS | 19 | -9.359  | -14.540 | 6.194  | 1.00 | 0.00 | TAG N   |
| ATOM | 329 | CE1 | HIS | 19 | -10.380 | -15.311 | 5.775  | 1.00 | 0.00 | TAG C   |
| ATOM | 330 | NE2 | HIS | 19 | -10.367 | -15.748 | 4.486  | 1.00 | 0.00 | TAG N   |
| ATOM | 331 | H   | HIS | 19 | -7.576  | -11.908 | 6.737  | 1.00 | 0.00 | TAG H   |
| ATOM | 332 | HA  | HIS | 19 | -6.611  | -11.659 | 4.418  | 1.00 | 0.00 | TAG H   |
| ATOM | 333 | 2HB | HIS | 19 | -6.688  | -13.932 | 5.734  | 1.00 | 0.00 | TAG H   |

|      |     |     |     |    |         |         |        |      |      |         |
|------|-----|-----|-----|----|---------|---------|--------|------|------|---------|
| ATOM | 334 | 3HB | HIS | 19 | -6.775  | -14.209 | 3.995  | 1.00 | 0.00 | TAG H   |
| ATOM | 335 | 2HD | HIS | 19 | -8.804  | -15.298 | 2.994  | 1.00 | 0.00 | TAG H   |
| ATOM | 336 | 1HE | HIS | 19 | -11.158 | -15.544 | 6.490  | 1.00 | 0.00 | TAG H   |
| ATOM | 337 | 2HE | HIS | 19 | -11.051 | -16.339 | 3.993  | 1.00 | 0.00 | TAG H   |
| ATOM | 338 | CA  | SER | 20 | -10.787 | -11.412 | 2.755  | 1.00 | 1.00 | TAG C   |
| ATOM | 339 | C   | SER | 20 | -10.501 | -10.090 | 2.059  | 1.00 | 1.00 | TAG C   |
| ATOM | 340 | O   | SER | 20 | -10.550 | -9.874  | 0.858  | 1.00 | 1.00 | TAG O   |
| ATOM | 341 | CB  | SER | 20 | -12.174 | -11.334 | 3.399  | 1.00 | 1.00 | TAG C   |
| ATOM | 342 | OG  | SER | 20 | -13.123 | -10.835 | 2.474  | 1.00 | 1.00 | TAG O   |
| ATOM | 343 | N01 | SER | 20 | -9.717  | -11.531 | 3.919  | 1.00 | 1.00 | TAG N   |
| ATOM | 344 | HA  | SER | 20 | -10.736 | -12.196 | 1.985  | 1.00 | 1.00 | TAG H   |
| ATOM | 345 | 1HB | SER | 20 | -12.481 | -12.332 | 3.745  | 1.00 | 1.00 | TAG H   |
| ATOM | 346 | 2HB | SER | 20 | -12.138 | -10.683 | 4.285  | 1.00 | 1.00 | TAG H   |
| ATOM | 347 | HG  | SER | 20 | -12.892 | -11.152 | 1.554  | 1.00 | 1.00 | TAG H   |
| ATOM | 348 | H01 | SER | 20 | -9.912  | -11.300 | 4.882  | 1.00 | 1.00 | TAG H   |
| ATOM | 349 | N   | HIS | 21 | -10.115 | -9.020  | 2.892  | 1.00 | 0.00 | TAG N   |
| ATOM | 350 | CA  | HIS | 21 | -9.880  | -7.689  | 2.337  | 1.00 | 0.00 | TAG C   |
| ATOM | 351 | C   | HIS | 21 | -8.662  | -7.682  | 1.445  | 1.00 | 0.00 | TAG C   |
| ATOM | 352 | O   | HIS | 21 | -8.610  | -7.110  | 0.307  | 1.00 | 0.00 | TAG O   |
| ATOM | 353 | CB  | HIS | 21 | -9.672  | -6.751  | 3.538  | 1.00 | 0.00 | TAG C   |
| ATOM | 354 | CG  | HIS | 21 | -10.935 | -6.534  | 4.317  | 1.00 | 0.00 | TAG C   |
| ATOM | 355 | CD2 | HIS | 21 | -12.184 | -6.914  | 3.843  | 1.00 | 0.00 | TAG C   |
| ATOM | 356 | ND1 | HIS | 21 | -11.027 | -5.945  | 5.577  | 1.00 | 0.00 | TAG N   |
| ATOM | 357 | CE1 | HIS | 21 | -12.357 | -6.012  | 5.767  | 1.00 | 0.00 | TAG C   |
| ATOM | 358 | NE2 | HIS | 21 | -13.117 | -6.575  | 4.789  | 1.00 | 0.00 | TAG N   |
| ATOM | 359 | H   | HIS | 21 | -10.001 | -9.173  | 3.870  | 1.00 | 0.00 | TAG H   |
| ATOM | 360 | HA  | HIS | 21 | -10.742 | -7.437  | 1.696  | 1.00 | 0.00 | TAG H   |
| ATOM | 361 | 2HB | HIS | 21 | -9.298  | -5.760  | 3.212  | 1.00 | 0.00 | TAG H   |
| ATOM | 362 | 3HB | HIS | 21 | -8.905  | -7.137  | 4.242  | 1.00 | 0.00 | TAG H   |
| ATOM | 363 | 2HD | HIS | 21 | -12.358 | -7.394  | 2.885  | 1.00 | 0.00 | TAG H   |
| ATOM | 364 | 1HE | HIS | 21 | -12.751 | -5.616  | 6.693  | 1.00 | 0.00 | TAG H   |
| ATOM | 365 | 2HE | HIS | 21 | -14.138 | -6.713  | 4.757  | 1.00 | 0.00 | TAG H   |
| ATOM | 366 | N   | ARG | 22 | -7.530  | -8.298  | 1.880  | 1.00 | 1.00 | TAG N   |
| ATOM | 367 | CA  | ARG | 22 | -6.290  | -8.346  | 1.124  | 1.00 | 1.00 | TAG C   |
| ATOM | 368 | C   | ARG | 22 | -6.777  | -8.305  | -0.323 | 1.00 | 1.00 | TAG C   |
| ATOM | 369 | CB  | ARG | 22 | -5.560  | -9.656  | 1.442  | 1.00 | 1.00 | TAG C   |
| ATOM | 370 | CG  | ARG | 22 | -4.211  | -9.821  | 0.749  | 1.00 | 1.00 | TAG C   |
| ATOM | 371 | CD  | ARG | 22 | -3.398  | -10.948 | 1.373  | 1.00 | 1.00 | TAG C   |
| ATOM | 372 | NE  | ARG | 22 | -4.227  | -12.113 | 1.677  | 1.00 | 1.00 | TAG N   |
| ATOM | 373 | CZ  | ARG | 22 | -4.219  | -12.756 | 2.844  | 1.00 | 1.00 | TAG C   |
| ATOM | 374 | NH1 | ARG | 22 | -3.418  | -12.354 | 3.830  | 1.00 | 1.00 | TAG N   |
| ATOM | 375 | NH2 | ARG | 22 | -5.032  | -13.793 | 3.034  | 1.00 | 1.00 | TAG N1+ |
| ATOM | 376 | O01 | ARG | 22 | -5.593  | -8.216  | -1.120 | 1.00 | 1.00 | TAG O   |
| ATOM | 377 | H   | ARG | 22 | -7.489  | -8.770  | 2.760  | 1.00 | 1.00 | TAG H   |
| ATOM | 378 | HA  | ARG | 22 | -5.580  | -7.537  | 1.348  | 1.00 | 1.00 | TAG H   |
| ATOM | 379 | 1HB | ARG | 22 | -5.408  | -9.719  | 2.530  | 1.00 | 1.00 | TAG H   |
| ATOM | 380 | 2HB | ARG | 22 | -6.208  | -10.498 | 1.158  | 1.00 | 1.00 | TAG H   |
| ATOM | 381 | 1HG | ARG | 22 | -4.369  | -10.029 | -0.320 | 1.00 | 1.00 | TAG H   |
| ATOM | 382 | 2HG | ARG | 22 | -3.645  | -8.879  | 0.814  | 1.00 | 1.00 | TAG H   |
| ATOM | 383 | 1HD | ARG | 22 | -2.590  | -11.241 | 0.686  | 1.00 | 1.00 | TAG H   |
| ATOM | 384 | 2HD | ARG | 22 | -2.920  | -10.587 | 2.297  | 1.00 | 1.00 | TAG H   |

|      |     |      |     |    |        |         |        |      |      |     |   |
|------|-----|------|-----|----|--------|---------|--------|------|------|-----|---|
| ATOM | 385 | HE   | ARG | 22 | -4.839 | -12.450 | 0.962  | 1.00 | 1.00 | TAG | H |
| ATOM | 386 | 1HH1 | ARG | 22 | -2.818 | -11.566 | 3.696  | 1.00 | 1.00 | TAG | H |
| ATOM | 387 | 2HH1 | ARG | 22 | -3.418 | -12.841 | 4.703  | 1.00 | 1.00 | TAG | H |
| ATOM | 388 | H01  | ARG | 22 | -5.225 | -13.894 | 4.020  | 1.00 | 1.00 | TAG | H |
| ATOM | 389 | H02  | ARG | 22 | -4.592 | -14.634 | 2.688  | 1.00 | 1.00 | TAG | H |
| ATOM | 390 | H03  | ARG | 22 | -5.897 | -13.637 | 2.537  | 1.00 | 1.00 | TAG | H |
| ATOM | 391 | N    | GLY | 23 | -7.457 | -9.146  | -0.854 | 1.00 | 1.00 | TAG | N |
| ATOM | 392 | CA   | GLY | 23 | -7.954 | -9.169  | -2.226 | 1.00 | 1.00 | TAG | C |
| ATOM | 393 | C    | GLY | 23 | -7.076 | -8.328  | -3.151 | 1.00 | 1.00 | TAG | C |
| ATOM | 394 | O    | GLY | 23 | -6.593 | -8.821  | -4.173 | 1.00 | 1.00 | TAG | O |
| ATOM | 395 | H    | GLY | 23 | -7.754 | -9.955  | -0.347 | 1.00 | 1.00 | TAG | H |
| ATOM | 396 | 1HA  | GLY | 23 | -7.984 | -10.207 | -2.589 | 1.00 | 1.00 | TAG | H |
| ATOM | 397 | 2HA  | GLY | 23 | -8.986 | -8.790  | -2.251 | 1.00 | 1.00 | TAG | H |
| ATOM | 398 | N    | TYR | 24 | -6.851 | -7.092  | -2.813 | 1.00 | 0.00 | TAG | N |
| ATOM | 399 | CA   | TYR | 24 | -6.007 | -6.142  | -3.531 | 1.00 | 0.00 | TAG | C |
| ATOM | 400 | C    | TYR | 24 | -4.974 | -6.859  | -4.366 | 1.00 | 0.00 | TAG | C |
| ATOM | 401 | O    | TYR | 24 | -4.416 | -7.886  | -4.038 | 1.00 | 0.00 | TAG | O |
| ATOM | 402 | CB   | TYR | 24 | -5.256 | -5.206  | -2.539 | 1.00 | 0.00 | TAG | C |
| ATOM | 403 | CG   | TYR | 24 | -4.437 | -4.066  | -3.154 | 1.00 | 0.00 | TAG | C |
| ATOM | 404 | CD1  | TYR | 24 | -4.706 | -3.614  | -4.450 | 1.00 | 0.00 | TAG | C |
| ATOM | 405 | CD2  | TYR | 24 | -3.417 | -3.464  | -2.411 | 1.00 | 0.00 | TAG | C |
| ATOM | 406 | CE1  | TYR | 24 | -3.964 | -2.567  | -4.992 | 1.00 | 0.00 | TAG | C |
| ATOM | 407 | CE2  | TYR | 24 | -2.677 | -2.418  | -2.955 | 1.00 | 0.00 | TAG | C |
| ATOM | 408 | CZ   | TYR | 24 | -2.951 | -1.971  | -4.246 | 1.00 | 0.00 | TAG | C |
| ATOM | 409 | OH   | TYR | 24 | -2.228 | -0.943  | -4.781 | 1.00 | 0.00 | TAG | O |
| ATOM | 410 | OXT  | TYR | 24 | -4.606 | -6.310  | -5.645 | 0.00 | 0.00 | TAG | O |
| ATOM | 411 | H    | TYR | 24 | -7.325 | -6.743  | -1.937 | 1.00 | 0.00 | TAG | H |
| ATOM | 412 | HA   | TYR | 24 | -6.640 | -5.544  | -4.214 | 1.00 | 0.00 | TAG | H |
| ATOM | 413 | 2HB  | TYR | 24 | -4.571 | -5.806  | -1.908 | 1.00 | 0.00 | TAG | H |
| ATOM | 414 | 3HB  | TYR | 24 | -5.980 | -4.790  | -1.808 | 1.00 | 0.00 | TAG | H |
| ATOM | 415 | 1HD  | TYR | 24 | -5.494 | -4.067  | -5.035 | 1.00 | 0.00 | TAG | H |
| ATOM | 416 | 2HD  | TYR | 24 | -3.206 | -3.799  | -1.405 | 1.00 | 0.00 | TAG | H |
| ATOM | 417 | 1HE  | TYR | 24 | -4.174 | -2.212  | -5.990 | 1.00 | 0.00 | TAG | H |
| ATOM | 418 | 2HE  | TYR | 24 | -1.896 | -1.958  | -2.369 | 1.00 | 0.00 | TAG | H |
| ATOM | 419 | HH   | TYR | 24 | -1.582 | -0.656  | -4.132 | 1.00 | 0.00 | TAG | H |
| ATOM | 420 | H01  | TYR | 24 | -4.688 | -5.354  | -5.619 | 0.00 | 0.00 | TAG | H |
| END  |     |      |     |    |        |         |        |      |      |     |   |

### Histatin conformer 3:

|      |    |     |     |   |        |        |        |      |      |     |     |
|------|----|-----|-----|---|--------|--------|--------|------|------|-----|-----|
| ATOM | 1  | N   | ASP | 1 | -0.753 | -1.254 | -0.000 | 1.00 | 1.00 | TAG | N1+ |
| ATOM | 2  | CA  | ASP | 1 | 0.000  | 0.000  | 0.000  | 1.00 | 1.00 | TAG | C   |
| ATOM | 3  | C   | ASP | 1 | -0.977 | 1.162  | 0.126  | 1.00 | 1.00 | TAG | C   |
| ATOM | 4  | O   | ASP | 1 | -0.996 | 1.864  | 1.147  | 1.00 | 1.00 | TAG | O   |
| ATOM | 5  | CB  | ASP | 1 | 0.960  | 0.223  | -1.175 | 1.00 | 1.00 | TAG | C   |
| ATOM | 6  | CG  | ASP | 1 | 1.836  | 1.489  | -1.014 | 1.00 | 1.00 | TAG | C   |
| ATOM | 7  | OD1 | ASP | 1 | 1.994  | 2.027  | 0.117  | 1.00 | 1.00 | TAG | O   |
| ATOM | 8  | OD2 | ASP | 1 | 2.382  | 1.952  | -2.045 | 1.00 | 1.00 | TAG | O1- |
| ATOM | 9  | 1H  | ASP | 1 | -0.117 | -2.025 | -0.000 | 1.00 | 1.00 | TAG | H   |
| ATOM | 10 | 2H  | ASP | 1 | -1.329 | -1.298 | 0.816  | 1.00 | 1.00 | TAG | H   |
| ATOM | 11 | 3H  | ASP | 1 | -1.329 | -1.298 | -0.816 | 1.00 | 1.00 | TAG | H   |

|      |    |     |     |   |        |        |        |      |      |     |     |
|------|----|-----|-----|---|--------|--------|--------|------|------|-----|-----|
| ATOM | 12 | HA  | ASP | 1 | 0.619  | -0.066 | 0.906  | 1.00 | 1.00 | TAG | H   |
| ATOM | 13 | 1HB | ASP | 1 | 1.613  | -0.656 | -1.279 | 1.00 | 1.00 | TAG | H   |
| ATOM | 14 | 2HB | ASP | 1 | 0.379  | 0.303  | -2.105 | 1.00 | 1.00 | TAG | H   |
| ATOM | 15 | H01 | ASP | 1 | 2.425  | 2.909  | -1.983 | 1.00 | 1.00 | TAG | H   |
| ATOM | 16 | N   | SER | 2 | -1.783 | 1.400  | -0.850 | 1.00 | 1.00 | TAG | N   |
| ATOM | 17 | CA  | SER | 2 | -2.804 | 2.448  | -0.821 | 1.00 | 1.00 | TAG | C   |
| ATOM | 18 | C   | SER | 2 | -3.967 | 2.161  | 0.116  | 1.00 | 1.00 | TAG | C   |
| ATOM | 19 | O   | SER | 2 | -4.487 | 2.934  | 0.906  | 1.00 | 1.00 | TAG | O   |
| ATOM | 20 | CB  | SER | 2 | -3.356 | 2.664  | -2.232 | 1.00 | 1.00 | TAG | C   |
| ATOM | 21 | OG  | SER | 2 | -4.446 | 3.566  | -2.207 | 1.00 | 1.00 | TAG | O   |
| ATOM | 22 | H   | SER | 2 | -1.770 | 0.881  | -1.705 | 1.00 | 1.00 | TAG | H   |
| ATOM | 23 | HA  | SER | 2 | -2.301 | 3.348  | -0.437 | 1.00 | 1.00 | TAG | H   |
| ATOM | 24 | 1HB | SER | 2 | -2.563 | 3.057  | -2.886 | 1.00 | 1.00 | TAG | H   |
| ATOM | 25 | 2HB | SER | 2 | -3.677 | 1.703  | -2.658 | 1.00 | 1.00 | TAG | H   |
| ATOM | 26 | HG  | SER | 2 | -4.793 | 3.697  | -3.136 | 1.00 | 1.00 | TAG | H   |
| ATOM | 27 | N   | HIS | 3 | -4.468 | 0.848  | 0.012  | 1.00 | 0.00 | TAG | N   |
| ATOM | 28 | CA  | HIS | 3 | -5.469 | 0.326  | 0.939  | 1.00 | 0.00 | TAG | C   |
| ATOM | 29 | C   | HIS | 3 | -4.957 | 0.347  | 2.358  | 1.00 | 0.00 | TAG | C   |
| ATOM | 30 | O   | HIS | 3 | -5.590 | -0.174 | 3.294  | 1.00 | 0.00 | TAG | O   |
| ATOM | 31 | CB  | HIS | 3 | -5.759 | -1.117 | 0.494  | 1.00 | 0.00 | TAG | C   |
| ATOM | 32 | CG  | HIS | 3 | -6.501 | -1.174 | -0.809 | 1.00 | 0.00 | TAG | C   |
| ATOM | 33 | CD2 | HIS | 3 | -5.940 | -1.689 | -1.970 | 1.00 | 0.00 | TAG | C   |
| ATOM | 34 | ND1 | HIS | 3 | -7.806 | -0.736 | -1.025 | 1.00 | 0.00 | TAG | N   |
| ATOM | 35 | CE1 | HIS | 3 | -7.932 | -1.023 | -2.334 | 1.00 | 0.00 | TAG | C   |
| ATOM | 36 | NE2 | HIS | 3 | -6.872 | -1.593 | -2.970 | 1.00 | 0.00 | TAG | N   |
| ATOM | 37 | H   | HIS | 3 | -4.131 | 0.260  | -0.712 | 1.00 | 0.00 | TAG | H   |
| ATOM | 38 | HA  | HIS | 3 | -6.339 | 1.004  | 0.907  | 1.00 | 0.00 | TAG | H   |
| ATOM | 39 | 2HB | HIS | 3 | -6.361 | -1.657 | 1.252  | 1.00 | 0.00 | TAG | H   |
| ATOM | 40 | 3HB | HIS | 3 | -4.830 | -1.714 | 0.378  | 1.00 | 0.00 | TAG | H   |
| ATOM | 41 | 2HD | HIS | 3 | -4.933 | -2.091 | -2.041 | 1.00 | 0.00 | TAG | H   |
| ATOM | 42 | 1HE | HIS | 3 | -8.874 | -0.787 | -2.810 | 1.00 | 0.00 | TAG | H   |
| ATOM | 43 | 2HE | HIS | 3 | -6.784 | -1.881 | -3.956 | 1.00 | 0.00 | TAG | H   |
| ATOM | 44 | N   | ALA | 4 | -3.773 | 0.942  | 2.578  | 1.00 | 1.00 | TAG | N   |
| ATOM | 45 | CA  | ALA | 4 | -3.163 | 1.024  | 3.891  | 1.00 | 1.00 | TAG | C   |
| ATOM | 46 | C   | ALA | 4 | -4.026 | 1.905  | 4.812  | 1.00 | 1.00 | TAG | C   |
| ATOM | 47 | O   | ALA | 4 | -4.295 | 1.519  | 5.946  | 1.00 | 1.00 | TAG | O   |
| ATOM | 48 | CB  | ALA | 4 | -1.759 | 1.612  | 3.765  | 1.00 | 1.00 | TAG | C   |
| ATOM | 49 | H   | ALA | 4 | -3.227 | 1.362  | 1.853  | 1.00 | 1.00 | TAG | H   |
| ATOM | 50 | HA  | ALA | 4 | -3.093 | 0.017  | 4.327  | 1.00 | 1.00 | TAG | H   |
| ATOM | 51 | 1HB | ALA | 4 | -1.296 | 1.675  | 4.761  | 1.00 | 1.00 | TAG | H   |
| ATOM | 52 | 2HB | ALA | 4 | -1.148 | 0.968  | 3.117  | 1.00 | 1.00 | TAG | H   |
| ATOM | 53 | 3HB | ALA | 4 | -1.821 | 2.619  | 3.325  | 1.00 | 1.00 | TAG | H   |
| ATOM | 54 | N   | LYS | 5 | -4.452 | 3.041  | 4.371  | 1.00 | 0.00 | TAG | N   |
| ATOM | 55 | CA  | LYS | 5 | -5.239 | 3.947  | 5.204  | 1.00 | 0.00 | TAG | C   |
| ATOM | 56 | C   | LYS | 5 | -6.317 | 3.197  | 5.950  | 1.00 | 0.00 | TAG | C   |
| ATOM | 57 | O   | LYS | 5 | -6.608 | 3.513  | 7.086  | 1.00 | 0.00 | TAG | O   |
| ATOM | 58 | CB  | LYS | 5 | -5.852 | 5.063  | 4.315  | 1.00 | 0.00 | TAG | C   |
| ATOM | 59 | CG  | LYS | 5 | -4.799 | 6.047  | 3.746  | 1.00 | 0.00 | TAG | C   |
| ATOM | 60 | CD  | LYS | 5 | -5.378 | 7.240  | 2.981  | 1.00 | 0.00 | TAG | C   |
| ATOM | 61 | CE  | LYS | 5 | -5.955 | 6.753  | 1.645  | 1.00 | 0.00 | TAG | C   |
| ATOM | 62 | NZ  | LYS | 5 | -4.863 | 6.241  | 0.799  | 1.00 | 0.00 | TAG | N1+ |

|      |     |     |     |   |         |        |        |      |      |     |     |
|------|-----|-----|-----|---|---------|--------|--------|------|------|-----|-----|
| ATOM | 63  | H   | LYS | 5 | -4.330  | 3.441  | 3.468  | 1.00 | 0.00 | TAG | H   |
| ATOM | 64  | HA  | LYS | 5 | -4.567  | 4.401  | 5.956  | 1.00 | 0.00 | TAG | H   |
| ATOM | 65  | 2HB | LYS | 5 | -6.616  | 5.623  | 4.894  | 1.00 | 0.00 | TAG | H   |
| ATOM | 66  | 3HB | LYS | 5 | -6.412  | 4.606  | 3.475  | 1.00 | 0.00 | TAG | H   |
| ATOM | 67  | 2HG | LYS | 5 | -4.086  | 5.495  | 3.102  | 1.00 | 0.00 | TAG | H   |
| ATOM | 68  | 3HG | LYS | 5 | -4.188  | 6.469  | 4.566  | 1.00 | 0.00 | TAG | H   |
| ATOM | 69  | 2HD | LYS | 5 | -4.584  | 7.994  | 2.803  | 1.00 | 0.00 | TAG | H   |
| ATOM | 70  | 3HD | LYS | 5 | -6.150  | 7.741  | 3.597  | 1.00 | 0.00 | TAG | H   |
| ATOM | 71  | 2HE | LYS | 5 | -6.483  | 7.572  | 1.115  | 1.00 | 0.00 | TAG | H   |
| ATOM | 72  | 3HE | LYS | 5 | -6.716  | 5.962  | 1.816  | 1.00 | 0.00 | TAG | H   |
| ATOM | 73  | H01 | LYS | 5 | -4.666  | 6.905  | 0.064  | 1.00 | 0.00 | TAG | H   |
| ATOM | 74  | H02 | LYS | 5 | -5.138  | 5.359  | 0.391  | 1.00 | 0.00 | TAG | H   |
| ATOM | 75  | N   | ARG | 6 | -6.907  | 2.204  | 5.321  | 1.00 | 1.00 | TAG | N   |
| ATOM | 76  | CA  | ARG | 6 | -8.112  | 1.526  | 5.835  | 1.00 | 1.00 | TAG | C   |
| ATOM | 77  | C   | ARG | 6 | -7.767  | 0.680  | 7.051  | 1.00 | 1.00 | TAG | C   |
| ATOM | 78  | O   | ARG | 6 | -8.570  | 0.559  | 7.988  | 1.00 | 1.00 | TAG | O   |
| ATOM | 79  | CB  | ARG | 6 | -8.795  | 0.652  | 4.775  | 1.00 | 1.00 | TAG | C   |
| ATOM | 80  | CG  | ARG | 6 | -9.399  | 1.416  | 3.632  | 1.00 | 1.00 | TAG | C   |
| ATOM | 81  | CD  | ARG | 6 | -10.553 | 2.279  | 4.082  | 1.00 | 1.00 | TAG | C   |
| ATOM | 82  | NE  | ARG | 6 | -10.763 | 3.377  | 3.144  | 1.00 | 1.00 | TAG | N   |
| ATOM | 83  | CZ  | ARG | 6 | -11.945 | 3.912  | 2.860  | 1.00 | 1.00 | TAG | C   |
| ATOM | 84  | NH1 | ARG | 6 | -13.060 | 3.408  | 3.392  | 1.00 | 1.00 | TAG | N1+ |
| ATOM | 85  | NH2 | ARG | 6 | -12.014 | 4.916  | 1.988  | 1.00 | 1.00 | TAG | N1+ |
| ATOM | 86  | H   | ARG | 6 | -6.579  | 1.833  | 4.453  | 1.00 | 1.00 | TAG | H   |
| ATOM | 87  | HA  | ARG | 6 | -8.822  | 2.316  | 6.119  | 1.00 | 1.00 | TAG | H   |
| ATOM | 88  | 1HB | ARG | 6 | -8.058  | -0.060 | 4.374  | 1.00 | 1.00 | TAG | H   |
| ATOM | 89  | 2HB | ARG | 6 | -9.584  | 0.058  | 5.261  | 1.00 | 1.00 | TAG | H   |
| ATOM | 90  | 1HG | ARG | 6 | -8.629  | 2.047  | 3.166  | 1.00 | 1.00 | TAG | H   |
| ATOM | 91  | 2HG | ARG | 6 | -9.748  | 0.710  | 2.862  | 1.00 | 1.00 | TAG | H   |
| ATOM | 92  | 1HD | ARG | 6 | -11.467 | 1.672  | 4.156  | 1.00 | 1.00 | TAG | H   |
| ATOM | 93  | 2HD | ARG | 6 | -10.350 | 2.680  | 5.087  | 1.00 | 1.00 | TAG | H   |
| ATOM | 94  | HE  | ARG | 6 | -9.959  | 3.753  | 2.682  | 1.00 | 1.00 | TAG | H   |
| ATOM | 95  | H01 | ARG | 6 | -13.006 | 2.630  | 4.034  | 1.00 | 1.00 | TAG | H   |
| ATOM | 96  | H02 | ARG | 6 | -13.958 | 3.804  | 3.152  | 1.00 | 1.00 | TAG | H   |
| ATOM | 97  | H03 | ARG | 6 | -12.554 | 4.628  | 1.185  | 1.00 | 1.00 | TAG | H   |
| ATOM | 98  | H04 | ARG | 6 | -11.082 | 5.172  | 1.694  | 1.00 | 1.00 | TAG | H   |
| ATOM | 99  | H05 | ARG | 6 | -12.458 | 5.711  | 2.425  | 1.00 | 1.00 | TAG | H   |
| ATOM | 100 | N   | HIS | 7 | -6.588  | 0.077  | 7.084  | 1.00 | 1.00 | TAG | N   |
| ATOM | 101 | CA  | HIS | 7 | -6.124  | -0.708 | 8.218  | 1.00 | 1.00 | TAG | C   |
| ATOM | 102 | C   | HIS | 7 | -5.130  | 0.007  | 9.135  | 1.00 | 1.00 | TAG | C   |
| ATOM | 103 | O   | HIS | 7 | -5.015  | -0.297 | 10.332 | 1.00 | 1.00 | TAG | O   |
| ATOM | 104 | CB  | HIS | 7 | -5.585  | -2.058 | 7.758  | 1.00 | 1.00 | TAG | C   |
| ATOM | 105 | CG  | HIS | 7 | -6.660  | -3.059 | 7.484  | 1.00 | 1.00 | TAG | C   |
| ATOM | 106 | CD2 | HIS | 7 | -7.189  | -3.261 | 6.227  | 1.00 | 1.00 | TAG | C   |
| ATOM | 107 | ND1 | HIS | 7 | -7.333  | -3.899 | 8.311  | 1.00 | 1.00 | TAG | N   |
| ATOM | 108 | CE1 | HIS | 7 | -8.246  | -4.581 | 7.549  | 1.00 | 1.00 | TAG | C   |
| ATOM | 109 | NE2 | HIS | 7 | -8.143  | -4.181 | 6.291  | 1.00 | 1.00 | TAG | N   |
| ATOM | 110 | H   | HIS | 7 | -5.933  | 0.119  | 6.330  | 1.00 | 1.00 | TAG | H   |
| ATOM | 111 | HA  | HIS | 7 | -7.013  | -0.867 | 8.845  | 1.00 | 1.00 | TAG | H   |
| ATOM | 112 | 1HB | HIS | 7 | -4.986  | -1.914 | 6.847  | 1.00 | 1.00 | TAG | H   |
| ATOM | 113 | 2HB | HIS | 7 | -4.909  | -2.457 | 8.528  | 1.00 | 1.00 | TAG | H   |

|      |     |     |     |    |        |        |        |      |      |     |   |
|------|-----|-----|-----|----|--------|--------|--------|------|------|-----|---|
| ATOM | 114 | HD1 | HIS | 7  | -7.189 | -4.002 | 9.296  | 1.00 | 1.00 | TAG | H |
| ATOM | 115 | HD2 | HIS | 7  | -6.869 | -2.740 | 5.312  | 1.00 | 1.00 | TAG | H |
| ATOM | 116 | HE1 | HIS | 7  | -8.951 | -5.338 | 7.921  | 1.00 | 1.00 | TAG | H |
| ATOM | 117 | N   | HIS | 8  | -4.392 | 0.982  | 8.582  | 1.00 | 1.00 | TAG | N |
| ATOM | 118 | CA  | HIS | 8  | -3.472 | 1.790  | 9.369  | 1.00 | 1.00 | TAG | C |
| ATOM | 119 | C   | HIS | 8  | -4.053 | 3.105  | 9.891  | 1.00 | 1.00 | TAG | C |
| ATOM | 120 | O   | HIS | 8  | -3.327 | 3.927  | 10.464 | 1.00 | 1.00 | TAG | O |
| ATOM | 121 | CB  | HIS | 8  | -2.169 | 2.017  | 8.614  | 1.00 | 1.00 | TAG | C |
| ATOM | 122 | CG  | HIS | 8  | -1.233 | 0.853  | 8.686  | 1.00 | 1.00 | TAG | C |
| ATOM | 123 | CD2 | HIS | 8  | -0.327 | 0.490  | 9.628  | 1.00 | 1.00 | TAG | C |
| ATOM | 124 | ND1 | HIS | 8  | -1.189 | -0.129 | 7.720  | 1.00 | 1.00 | TAG | N |
| ATOM | 125 | CE1 | HIS | 8  | -0.296 | -1.048 | 8.062  | 1.00 | 1.00 | TAG | C |
| ATOM | 126 | NE2 | HIS | 8  | 0.241  | -0.689 | 9.220  | 1.00 | 1.00 | TAG | N |
| ATOM | 127 | H   | HIS | 8  | -4.420 | 1.217  | 7.610  | 1.00 | 1.00 | TAG | H |
| ATOM | 128 | HA  | HIS | 8  | -3.268 | 1.200  | 10.274 | 1.00 | 1.00 | TAG | H |
| ATOM | 129 | 1HB | HIS | 8  | -2.396 | 2.230  | 7.558  | 1.00 | 1.00 | TAG | H |
| ATOM | 130 | 2HB | HIS | 8  | -1.668 | 2.907  | 9.021  | 1.00 | 1.00 | TAG | H |
| ATOM | 131 | HD2 | HIS | 8  | -0.090 | 1.041  | 10.551 | 1.00 | 1.00 | TAG | H |
| ATOM | 132 | HE1 | HIS | 8  | -0.044 | -1.950 | 7.487  | 1.00 | 1.00 | TAG | H |
| ATOM | 133 | HE2 | HIS | 8  | 0.946  | -1.196 | 9.716  | 1.00 | 1.00 | TAG | H |
| ATOM | 134 | N   | GLY | 9  | -5.433 | 3.160  | 9.790  | 1.00 | 1.00 | TAG | N |
| ATOM | 135 | CA  | GLY | 9  | -6.227 | 4.287  | 10.314 | 1.00 | 1.00 | TAG | C |
| ATOM | 136 | C   | GLY | 9  | -5.881 | 5.647  | 9.694  | 1.00 | 1.00 | TAG | C |
| ATOM | 137 | O   | GLY | 9  | -6.369 | 6.692  | 10.132 | 1.00 | 1.00 | TAG | O |
| ATOM | 138 | H   | GLY | 9  | -5.982 | 2.445  | 9.357  | 1.00 | 1.00 | TAG | H |
| ATOM | 139 | 1HA | GLY | 9  | -7.293 | 4.079  | 10.142 | 1.00 | 1.00 | TAG | H |
| ATOM | 140 | 2HA | GLY | 9  | -6.082 | 4.346  | 11.402 | 1.00 | 1.00 | TAG | H |
| ATOM | 141 | N   | TYR | 10 | -5.025 | 5.607  | 8.703  | 1.00 | 0.00 | TAG | N |
| ATOM | 142 | CA  | TYR | 10 | -4.565 | 6.828  | 8.048  | 1.00 | 0.00 | TAG | C |
| ATOM | 143 | C   | TYR | 10 | -5.284 | 7.042  | 6.738  | 1.00 | 0.00 | TAG | C |
| ATOM | 144 | O   | TYR | 10 | -4.672 | 7.352  | 5.737  | 1.00 | 0.00 | TAG | O |
| ATOM | 145 | CB  | TYR | 10 | -3.038 | 6.759  | 7.753  | 1.00 | 0.00 | TAG | C |
| ATOM | 146 | CG  | TYR | 10 | -2.102 | 6.761  | 8.967  | 1.00 | 0.00 | TAG | C |
| ATOM | 147 | CD1 | TYR | 10 | -2.570 | 7.144  | 10.228 | 1.00 | 0.00 | TAG | C |
| ATOM | 148 | CD2 | TYR | 10 | -0.769 | 6.368  | 8.817  | 1.00 | 0.00 | TAG | C |
| ATOM | 149 | CE1 | TYR | 10 | -1.714 | 7.127  | 11.325 | 1.00 | 0.00 | TAG | C |
| ATOM | 150 | CE2 | TYR | 10 | 0.086  | 6.353  | 9.915  | 1.00 | 0.00 | TAG | C |
| ATOM | 151 | CZ  | TYR | 10 | -0.388 | 6.732  | 11.169 | 1.00 | 0.00 | TAG | C |
| ATOM | 152 | OH  | TYR | 10 | 0.448  | 6.715  | 12.249 | 1.00 | 0.00 | TAG | O |
| ATOM | 153 | H   | TYR | 10 | -4.679 | 4.724  | 8.390  | 1.00 | 0.00 | TAG | H |
| ATOM | 154 | HA  | TYR | 10 | -4.788 | 7.692  | 8.702  | 1.00 | 0.00 | TAG | H |
| ATOM | 155 | 2HB | TYR | 10 | -2.746 | 7.609  | 7.105  | 1.00 | 0.00 | TAG | H |
| ATOM | 156 | 3HB | TYR | 10 | -2.826 | 5.870  | 7.123  | 1.00 | 0.00 | TAG | H |
| ATOM | 157 | 1HD | TYR | 10 | -3.600 | 7.446  | 10.360 | 1.00 | 0.00 | TAG | H |
| ATOM | 158 | 2HD | TYR | 10 | -0.397 | 6.061  | 7.848  | 1.00 | 0.00 | TAG | H |
| ATOM | 159 | 1HE | TYR | 10 | -2.075 | 7.416  | 12.301 | 1.00 | 0.00 | TAG | H |
| ATOM | 160 | 2HE | TYR | 10 | 1.111  | 6.041  | 9.786  | 1.00 | 0.00 | TAG | H |
| ATOM | 161 | HH  | TYR | 10 | 1.313  | 6.418  | 11.959 | 1.00 | 0.00 | TAG | H |
| ATOM | 162 | N   | LYS | 11 | -6.493 | 6.863  | 6.627  | 1.00 | 0.00 | TAG | N |
| ATOM | 163 | CA  | LYS | 11 | -7.236 | 6.950  | 5.373  | 1.00 | 0.00 | TAG | C |
| ATOM | 164 | C   | LYS | 11 | -7.582 | 8.384  | 5.047  | 1.00 | 0.00 | TAG | C |

|      |     |     |     |    |         |        |        |      |      |         |
|------|-----|-----|-----|----|---------|--------|--------|------|------|---------|
| ATOM | 165 | O   | LYS | 11 | -7.981  | 8.665  | 3.916  | 1.00 | 0.00 | TAG O   |
| ATOM | 166 | CB  | LYS | 11 | -8.518  | 6.078  | 5.470  | 1.00 | 0.00 | TAG C   |
| ATOM | 167 | CG  | LYS | 11 | -9.590  | 6.663  | 6.423  | 1.00 | 0.00 | TAG C   |
| ATOM | 168 | CD  | LYS | 11 | -10.877 | 5.840  | 6.528  | 1.00 | 0.00 | TAG C   |
| ATOM | 169 | CE  | LYS | 11 | -11.875 | 6.574  | 7.434  | 1.00 | 0.00 | TAG C   |
| ATOM | 170 | NZ  | LYS | 11 | -13.118 | 5.789  | 7.531  | 1.00 | 0.00 | TAG N1+ |
| ATOM | 171 | H   | LYS | 11 | -7.006  | 6.643  | 7.455  | 1.00 | 0.00 | TAG H   |
| ATOM | 172 | HA  | LYS | 11 | -6.592  | 6.570  | 4.558  | 1.00 | 0.00 | TAG H   |
| ATOM | 173 | 2HB | LYS | 11 | -8.247  | 5.052  | 5.793  | 1.00 | 0.00 | TAG H   |
| ATOM | 174 | 3HB | LYS | 11 | -8.960  | 5.951  | 4.462  | 1.00 | 0.00 | TAG H   |
| ATOM | 175 | 2HG | LYS | 11 | -9.829  | 7.701  | 6.120  | 1.00 | 0.00 | TAG H   |
| ATOM | 176 | 3HG | LYS | 11 | -9.186  | 6.742  | 7.450  | 1.00 | 0.00 | TAG H   |
| ATOM | 177 | 2HD | LYS | 11 | -10.649 | 4.837  | 6.943  | 1.00 | 0.00 | TAG H   |
| ATOM | 178 | 3HD | LYS | 11 | -11.297 | 5.671  | 5.517  | 1.00 | 0.00 | TAG H   |
| ATOM | 179 | 2HE | LYS | 11 | -12.105 | 7.585  | 7.039  | 1.00 | 0.00 | TAG H   |
| ATOM | 180 | 3HE | LYS | 11 | -11.438 | 6.734  | 8.442  | 1.00 | 0.00 | TAG H   |
| ATOM | 181 | H01 | LYS | 11 | -13.396 | 5.716  | 8.499  | 1.00 | 0.00 | TAG H   |
| ATOM | 182 | H02 | LYS | 11 | -12.963 | 4.865  | 7.154  | 1.00 | 0.00 | TAG H   |
| ATOM | 183 | N   | ARG | 12 | -7.483  | 9.277  | 5.901  | 1.00 | 1.00 | TAG N   |
| ATOM | 184 | CA  | ARG | 12 | -7.755  | 10.689 | 5.688  | 1.00 | 1.00 | TAG C   |
| ATOM | 185 | C   | ARG | 12 | -6.827  | 11.040 | 4.528  | 1.00 | 1.00 | TAG C   |
| ATOM | 186 | O   | ARG | 12 | -7.286  | 12.080 | 3.795  | 1.00 | 1.00 | TAG O   |
| ATOM | 187 | CB  | ARG | 12 | -7.395  | 11.463 | 6.959  | 1.00 | 1.00 | TAG C   |
| ATOM | 188 | CG  | ARG | 12 | -7.677  | 12.963 | 6.896  | 1.00 | 1.00 | TAG C   |
| ATOM | 189 | CD  | ARG | 12 | -7.634  | 13.597 | 8.280  | 1.00 | 1.00 | TAG C   |
| ATOM | 190 | NE  | ARG | 12 | -6.527  | 13.082 | 9.082  | 1.00 | 1.00 | TAG N   |
| ATOM | 191 | CZ  | ARG | 12 | -6.646  | 12.651 | 10.337 | 1.00 | 1.00 | TAG C   |
| ATOM | 192 | NH1 | ARG | 12 | -7.829  | 12.676 | 10.948 | 1.00 | 1.00 | TAG N1+ |
| ATOM | 193 | NH2 | ARG | 12 | -5.582  | 12.173 | 10.977 | 1.00 | 1.00 | TAG N1+ |
| ATOM | 194 | H   | ARG | 12 | -7.192  | 9.086  | 6.838  | 1.00 | 1.00 | TAG H   |
| ATOM | 195 | HA  | ARG | 12 | -8.806  | 10.929 | 5.467  | 1.00 | 1.00 | TAG H   |
| ATOM | 196 | 1HB | ARG | 12 | -7.955  | 11.035 | 7.804  | 1.00 | 1.00 | TAG H   |
| ATOM | 197 | 2HB | ARG | 12 | -6.326  | 11.314 | 7.172  | 1.00 | 1.00 | TAG H   |
| ATOM | 198 | 1HG | ARG | 12 | -6.936  | 13.450 | 6.245  | 1.00 | 1.00 | TAG H   |
| ATOM | 199 | 2HG | ARG | 12 | -8.664  | 13.133 | 6.443  | 1.00 | 1.00 | TAG H   |
| ATOM | 200 | 1HD | ARG | 12 | -7.536  | 14.689 | 8.180  | 1.00 | 1.00 | TAG H   |
| ATOM | 201 | 2HD | ARG | 12 | -8.584  | 13.406 | 8.801  | 1.00 | 1.00 | TAG H   |
| ATOM | 202 | HE  | ARG | 12 | -5.620  | 13.050 | 8.662  | 1.00 | 1.00 | TAG H   |
| ATOM | 203 | H01 | ARG | 12 | -8.641  | 13.031 | 10.463 | 1.00 | 1.00 | TAG H   |
| ATOM | 204 | H02 | ARG | 12 | -7.915  | 12.340 | 11.897 | 1.00 | 1.00 | TAG H   |
| ATOM | 205 | H03 | ARG | 12 | -5.267  | 11.328 | 10.523 | 1.00 | 1.00 | TAG H   |
| ATOM | 206 | H04 | ARG | 12 | -5.828  | 11.970 | 11.935 | 1.00 | 1.00 | TAG H   |
| ATOM | 207 | H05 | ARG | 12 | -4.842  | 12.860 | 10.959 | 1.00 | 1.00 | TAG H   |
| ATOM | 208 | N   | LYS | 13 | -5.729  | 10.669 | 4.320  | 1.00 | 1.00 | TAG N   |
| ATOM | 209 | CA  | LYS | 13 | -4.870  | 11.043 | 3.204  | 1.00 | 1.00 | TAG C   |
| ATOM | 210 | C   | LYS | 13 | -5.674  | 11.078 | 1.910  | 1.00 | 1.00 | TAG C   |
| ATOM | 211 | O   | LYS | 13 | -5.181  | 11.590 | 0.894  | 1.00 | 1.00 | TAG O   |
| ATOM | 212 | CB  | LYS | 13 | -3.703  | 10.059 | 3.072  | 1.00 | 1.00 | TAG C   |
| ATOM | 213 | CG  | LYS | 13 | -2.662  | 10.221 | 4.152  | 1.00 | 1.00 | TAG C   |
| ATOM | 214 | CD  | LYS | 13 | -1.550  | 9.204  | 4.009  | 1.00 | 1.00 | TAG C   |
| ATOM | 215 | CE  | LYS | 13 | -0.545  | 9.385  | 5.143  | 1.00 | 1.00 | TAG C   |

|      |     |     |     |    |         |        |        |      |      |     |     |
|------|-----|-----|-----|----|---------|--------|--------|------|------|-----|-----|
| ATOM | 216 | NZ  | LYS | 13 | 0.449   | 8.285  | 5.217  | 1.00 | 1.00 | TAG | N1+ |
| ATOM | 217 | H   | LYS | 13 | -5.276  | 10.025 | 4.938  | 1.00 | 1.00 | TAG | H   |
| ATOM | 218 | HA  | LYS | 13 | -4.462  | 12.047 | 3.397  | 1.00 | 1.00 | TAG | H   |
| ATOM | 219 | 1HB | LYS | 13 | -4.094  | 9.031  | 3.101  | 1.00 | 1.00 | TAG | H   |
| ATOM | 220 | 2HB | LYS | 13 | -3.227  | 10.194 | 2.090  | 1.00 | 1.00 | TAG | H   |
| ATOM | 221 | 1HG | LYS | 13 | -2.240  | 11.236 | 4.107  | 1.00 | 1.00 | TAG | H   |
| ATOM | 222 | 2HG | LYS | 13 | -3.135  | 10.113 | 5.139  | 1.00 | 1.00 | TAG | H   |
| ATOM | 223 | 1HD | LYS | 13 | -1.965  | 8.186  | 4.031  | 1.00 | 1.00 | TAG | H   |
| ATOM | 224 | 2HD | LYS | 13 | -1.048  | 9.326  | 3.037  | 1.00 | 1.00 | TAG | H   |
| ATOM | 225 | 1HE | LYS | 13 | -0.016  | 10.341 | 5.008  | 1.00 | 1.00 | TAG | H   |
| ATOM | 226 | 2HE | LYS | 13 | -1.086  | 9.448  | 6.099  | 1.00 | 1.00 | TAG | H   |
| ATOM | 227 | H01 | LYS | 13 | 0.679   | 7.975  | 4.284  | 1.00 | 1.00 | TAG | H   |
| ATOM | 228 | H02 | LYS | 13 | 0.061   | 7.514  | 5.742  | 1.00 | 1.00 | TAG | H   |
| ATOM | 229 | N   | PHE | 14 | -6.870  | 10.602 | 1.862  | 1.00 | 0.00 | TAG | N   |
| ATOM | 230 | CA  | PHE | 14 | -7.671  | 10.603 | 0.641  | 1.00 | 0.00 | TAG | C   |
| ATOM | 231 | C   | PHE | 14 | -8.212  | 11.983 | 0.349  | 1.00 | 0.00 | TAG | C   |
| ATOM | 232 | O   | PHE | 14 | -8.529  | 12.282 | -0.834 | 1.00 | 0.00 | TAG | O   |
| ATOM | 233 | CB  | PHE | 14 | -8.868  | 9.615  | 0.786  | 1.00 | 0.00 | TAG | C   |
| ATOM | 234 | CG  | PHE | 14 | -9.684  | 9.336  | -0.486 | 1.00 | 0.00 | TAG | C   |
| ATOM | 235 | CD1 | PHE | 14 | -9.148  | 8.515  | -1.484 | 1.00 | 0.00 | TAG | C   |
| ATOM | 236 | CD2 | PHE | 14 | -10.926 | 9.942  | -0.686 | 1.00 | 0.00 | TAG | C   |
| ATOM | 237 | CE1 | PHE | 14 | -9.838  | 8.318  | -2.676 | 1.00 | 0.00 | TAG | C   |
| ATOM | 238 | CE2 | PHE | 14 | -11.622 | 9.736  | -1.875 | 1.00 | 0.00 | TAG | C   |
| ATOM | 239 | CZ  | PHE | 14 | -11.076 | 8.926  | -2.870 | 1.00 | 0.00 | TAG | C   |
| ATOM | 240 | H   | PHE | 14 | -7.267  | 10.213 | 2.698  | 1.00 | 0.00 | TAG | H   |
| ATOM | 241 | HA  | PHE | 14 | -7.031  | 10.299 | -0.209 | 1.00 | 0.00 | TAG | H   |
| ATOM | 242 | 2HB | PHE | 14 | -9.559  | 9.985  | 1.570  | 1.00 | 0.00 | TAG | H   |
| ATOM | 243 | 3HB | PHE | 14 | -8.506  | 8.650  | 1.198  | 1.00 | 0.00 | TAG | H   |
| ATOM | 244 | 1HD | PHE | 14 | -8.173  | 8.064  | -1.353 | 1.00 | 0.00 | TAG | H   |
| ATOM | 245 | 2HD | PHE | 14 | -11.346 | 10.589 | 0.072  | 1.00 | 0.00 | TAG | H   |
| ATOM | 246 | 1HE | PHE | 14 | -9.402  | 7.707  | -3.452 | 1.00 | 0.00 | TAG | H   |
| ATOM | 247 | 2HE | PHE | 14 | -12.579 | 10.213 | -2.029 | 1.00 | 0.00 | TAG | H   |
| ATOM | 248 | HZ  | PHE | 14 | -11.607 | 8.776  | -3.798 | 1.00 | 0.00 | TAG | H   |
| ATOM | 249 | N   | HIS | 15 | -8.299  | 12.881 | 1.326  | 1.00 | 0.00 | TAG | N   |
| ATOM | 250 | CA  | HIS | 15 | -8.707  | 14.273 | 1.155  | 1.00 | 0.00 | TAG | C   |
| ATOM | 251 | C   | HIS | 15 | -7.691  | 15.213 | 1.758  | 1.00 | 0.00 | TAG | C   |
| ATOM | 252 | O   | HIS | 15 | -7.035  | 16.024 | 1.046  | 1.00 | 0.00 | TAG | O   |
| ATOM | 253 | CB  | HIS | 15 | -10.061 | 14.417 | 1.869  | 1.00 | 0.00 | TAG | C   |
| ATOM | 254 | CG  | HIS | 15 | -10.670 | 15.774 | 1.668  | 1.00 | 0.00 | TAG | C   |
| ATOM | 255 | CD2 | HIS | 15 | -10.078 | 16.752 | 0.881  | 1.00 | 0.00 | TAG | C   |
| ATOM | 256 | ND1 | HIS | 15 | -11.867 | 16.221 | 2.223  | 1.00 | 0.00 | TAG | N   |
| ATOM | 257 | CE1 | HIS | 15 | -11.903 | 17.469 | 1.718  | 1.00 | 0.00 | TAG | C   |
| ATOM | 258 | NE2 | HIS | 15 | -10.882 | 17.863 | 0.910  | 1.00 | 0.00 | TAG | N   |
| ATOM | 259 | H   | HIS | 15 | -8.059  | 12.580 | 2.261  | 1.00 | 0.00 | TAG | H   |
| ATOM | 260 | HA  | HIS | 15 | -8.729  | 14.484 | 0.073  | 1.00 | 0.00 | TAG | H   |
| ATOM | 261 | 2HB | HIS | 15 | -9.959  | 14.247 | 2.959  | 1.00 | 0.00 | TAG | H   |
| ATOM | 262 | 3HB | HIS | 15 | -10.799 | 13.663 | 1.522  | 1.00 | 0.00 | TAG | H   |
| ATOM | 263 | 2HD | HIS | 15 | -9.140  | 16.629 | 0.347  | 1.00 | 0.00 | TAG | H   |
| ATOM | 264 | 1HE | HIS | 15 | -12.747 | 18.092 | 1.981  | 1.00 | 0.00 | TAG | H   |
| ATOM | 265 | 2HE | HIS | 15 | -10.739 | 18.767 | 0.436  | 1.00 | 0.00 | TAG | H   |
| ATOM | 266 | N   | GLU | 16 | -7.459  | 15.145 | 3.056  | 1.00 | 0.00 | TAG | N   |



|      |     |     |     |    |        |        |        |      |      |         |
|------|-----|-----|-----|----|--------|--------|--------|------|------|---------|
| ATOM | 267 | CA  | GLU | 16 | -6.630 | 16.106 | 3.779  | 1.00 | 0.00 | TAG C   |
| ATOM | 268 | C   | GLU | 16 | -5.206 | 16.073 | 3.281  | 1.00 | 0.00 | TAG C   |
| ATOM | 269 | O   | GLU | 16 | -4.505 | 17.082 | 3.345  | 1.00 | 0.00 | TAG O   |
| ATOM | 270 | CB  | GLU | 16 | -6.681 | 15.800 | 5.303  | 1.00 | 0.00 | TAG C   |
| ATOM | 271 | CG  | GLU | 16 | -5.908 | 16.802 | 6.221  | 1.00 | 0.00 | TAG C   |
| ATOM | 272 | CD  | GLU | 16 | -6.017 | 16.634 | 7.725  | 1.00 | 0.00 | TAG C   |
| ATOM | 273 | OE1 | GLU | 16 | -5.730 | 15.551 | 8.270  | 1.00 | 0.00 | TAG O   |
| ATOM | 274 | OE2 | GLU | 16 | -6.391 | 17.634 | 8.373  | 1.00 | 0.00 | TAG O1- |
| ATOM | 275 | H   | GLU | 16 | -7.872 | 14.399 | 3.570  | 1.00 | 0.00 | TAG H   |
| ATOM | 276 | HA  | GLU | 16 | -7.029 | 17.121 | 3.601  | 1.00 | 0.00 | TAG H   |
| ATOM | 277 | 2HB | GLU | 16 | -6.291 | 14.779 | 5.493  | 1.00 | 0.00 | TAG H   |
| ATOM | 278 | 3HB | GLU | 16 | -7.733 | 15.759 | 5.645  | 1.00 | 0.00 | TAG H   |
| ATOM | 279 | 2HG | GLU | 16 | -6.196 | 17.844 | 6.005  | 1.00 | 0.00 | TAG H   |
| ATOM | 280 | 3HG | GLU | 16 | -4.821 | 16.752 | 6.043  | 1.00 | 0.00 | TAG H   |
| ATOM | 281 | H01 | GLU | 16 | -6.401 | 18.403 | 7.798  | 1.00 | 0.00 | TAG H   |
| ATOM | 282 | N   | LYS | 17 | -4.757 | 14.928 | 2.800  | 1.00 | 0.00 | TAG N   |
| ATOM | 283 | CA  | LYS | 17 | -3.432 | 14.789 | 2.201  | 1.00 | 0.00 | TAG C   |
| ATOM | 284 | C   | LYS | 17 | -3.311 | 15.632 | 0.954  | 1.00 | 0.00 | TAG C   |
| ATOM | 285 | O   | LYS | 17 | -2.293 | 16.274 | 0.725  | 1.00 | 0.00 | TAG O   |
| ATOM | 286 | CB  | LYS | 17 | -3.161 | 13.292 | 1.889  | 1.00 | 0.00 | TAG C   |
| ATOM | 287 | CG  | LYS | 17 | -1.735 | 13.024 | 1.347  | 1.00 | 0.00 | TAG C   |
| ATOM | 288 | CD  | LYS | 17 | -0.610 | 13.217 | 2.369  | 1.00 | 0.00 | TAG C   |
| ATOM | 289 | CE  | LYS | 17 | 0.723  | 12.791 | 1.740  | 1.00 | 0.00 | TAG C   |
| ATOM | 290 | NZ  | LYS | 17 | 1.804  | 12.949 | 2.729  | 1.00 | 0.00 | TAG N1+ |
| ATOM | 291 | H   | LYS | 17 | -5.346 | 14.127 | 2.847  | 1.00 | 0.00 | TAG H   |
| ATOM | 292 | HA  | LYS | 17 | -2.682 | 15.157 | 2.925  | 1.00 | 0.00 | TAG H   |
| ATOM | 293 | 2HB | LYS | 17 | -3.915 | 12.919 | 1.166  | 1.00 | 0.00 | TAG H   |
| ATOM | 294 | 3HB | LYS | 17 | -3.321 | 12.686 | 2.803  | 1.00 | 0.00 | TAG H   |
| ATOM | 295 | 2HG | LYS | 17 | -1.550 | 13.659 | 0.459  | 1.00 | 0.00 | TAG H   |
| ATOM | 296 | 3HG | LYS | 17 | -1.653 | 11.982 | 0.986  | 1.00 | 0.00 | TAG H   |
| ATOM | 297 | 2HD | LYS | 17 | -0.818 | 12.610 | 3.274  | 1.00 | 0.00 | TAG H   |
| ATOM | 298 | 3HD | LYS | 17 | -0.582 | 14.273 | 2.701  | 1.00 | 0.00 | TAG H   |
| ATOM | 299 | 2HE | LYS | 17 | 0.952  | 13.397 | 0.839  | 1.00 | 0.00 | TAG H   |
| ATOM | 300 | 3HE | LYS | 17 | 0.668  | 11.738 | 1.391  | 1.00 | 0.00 | TAG H   |
| ATOM | 301 | 1HZ | LYS | 17 | 1.473  | 12.701 | 3.669  | 1.00 | 0.00 | TAG H   |
| ATOM | 302 | 2HZ | LYS | 17 | 2.588  | 12.321 | 2.528  | 1.00 | 0.00 | TAG H   |
| ATOM | 303 | 3HZ | LYS | 17 | 2.095  | 13.915 | 2.680  | 1.00 | 0.00 | TAG H   |
| ATOM | 304 | N   | HIS | 18 | -4.401 | 15.777 | 0.216  | 1.00 | 0.00 | TAG N   |
| ATOM | 305 | CA  | HIS | 18 | -4.444 | 16.400 | -1.104 | 1.00 | 0.00 | TAG C   |
| ATOM | 306 | C   | HIS | 18 | -4.447 | 17.905 | -0.994 | 1.00 | 0.00 | TAG C   |
| ATOM | 307 | O   | HIS | 18 | -4.036 | 18.640 | -1.918 | 1.00 | 0.00 | TAG O   |
| ATOM | 308 | CB  | HIS | 18 | -5.738 | 15.907 | -1.773 | 1.00 | 0.00 | TAG C   |
| ATOM | 309 | CG  | HIS | 18 | -5.698 | 14.439 | -2.080 | 1.00 | 0.00 | TAG C   |
| ATOM | 310 | CD2 | HIS | 18 | -4.524 | 13.698 | -2.053 | 1.00 | 0.00 | TAG C   |
| ATOM | 311 | ND1 | HIS | 18 | -6.792 | 13.647 | -2.420 | 1.00 | 0.00 | TAG N   |
| ATOM | 312 | CE1 | HIS | 18 | -6.177 | 12.461 | -2.582 | 1.00 | 0.00 | TAG C   |
| ATOM | 313 | NE2 | HIS | 18 | -4.832 | 12.403 | -2.380 | 1.00 | 0.00 | TAG N   |
| ATOM | 314 | H   | HIS | 18 | -5.258 | 15.435 | 0.590  | 1.00 | 0.00 | TAG H   |
| ATOM | 315 | HA  | HIS | 18 | -3.515 | 16.124 | -1.633 | 1.00 | 0.00 | TAG H   |
| ATOM | 316 | 2HB | HIS | 18 | -5.930 | 16.448 | -2.721 | 1.00 | 0.00 | TAG H   |
| ATOM | 317 | 3HB | HIS | 18 | -6.632 | 16.095 | -1.142 | 1.00 | 0.00 | TAG H   |

|      |     |     |     |    |        |        |        |      |      |     |   |
|------|-----|-----|-----|----|--------|--------|--------|------|------|-----|---|
| ATOM | 318 | 2HD | HIS | 18 | -3.546 | 14.104 | -1.812 | 1.00 | 0.00 | TAG | H |
| ATOM | 319 | 1HE | HIS | 18 | -6.788 | 11.613 | -2.861 | 1.00 | 0.00 | TAG | H |
| ATOM | 320 | 2HE | HIS | 18 | -4.198 | 11.595 | -2.455 | 1.00 | 0.00 | TAG | H |
| ATOM | 321 | N   | HIS | 19 | -5.097 | 18.456 | 0.023  | 1.00 | 1.00 | TAG | N |
| ATOM | 322 | CA  | HIS | 19 | -5.235 | 19.895 | 0.197  | 1.00 | 1.00 | TAG | C |
| ATOM | 323 | C   | HIS | 19 | -5.060 | 20.392 | 1.633  | 1.00 | 1.00 | TAG | C |
| ATOM | 324 | O   | HIS | 19 | -4.194 | 21.163 | 2.064  | 1.00 | 1.00 | TAG | O |
| ATOM | 325 | CB  | HIS | 19 | -6.540 | 20.391 | -0.411 | 1.00 | 1.00 | TAG | C |
| ATOM | 326 | CG  | HIS | 19 | -6.476 | 20.560 | -1.894 | 1.00 | 1.00 | TAG | C |
| ATOM | 327 | CD2 | HIS | 19 | -6.872 | 19.576 | -2.774 | 1.00 | 1.00 | TAG | C |
| ATOM | 328 | ND1 | HIS | 19 | -6.027 | 21.586 | -2.661 | 1.00 | 1.00 | TAG | N |
| ATOM | 329 | CE1 | HIS | 19 | -6.159 | 21.209 | -3.971 | 1.00 | 1.00 | TAG | C |
| ATOM | 330 | NE2 | HIS | 19 | -6.671 | 19.988 | -4.019 | 1.00 | 1.00 | TAG | N |
| ATOM | 331 | H   | HIS | 19 | -5.553 | 17.920 | 0.734  | 1.00 | 1.00 | TAG | H |
| ATOM | 332 | HA  | HIS | 19 | -4.389 | 20.336 | -0.351 | 1.00 | 1.00 | TAG | H |
| ATOM | 333 | 1HB | HIS | 19 | -7.344 | 19.682 | -0.164 | 1.00 | 1.00 | TAG | H |
| ATOM | 334 | 2HB | HIS | 19 | -6.808 | 21.354 | 0.049  | 1.00 | 1.00 | TAG | H |
| ATOM | 335 | HD2 | HIS | 19 | -7.291 | 18.599 | -2.488 | 1.00 | 1.00 | TAG | H |
| ATOM | 336 | HE1 | HIS | 19 | -5.884 | 21.820 | -4.843 | 1.00 | 1.00 | TAG | H |
| ATOM | 337 | HE2 | HIS | 19 | -6.872 | 19.467 | -4.849 | 1.00 | 1.00 | TAG | H |
| ATOM | 338 | N   | SER | 20 | -6.000 | 19.873 | 2.511  | 1.00 | 0.00 | TAG | N |
| ATOM | 339 | CA  | SER | 20 | -6.064 | 20.210 | 3.930  | 1.00 | 0.00 | TAG | C |
| ATOM | 340 | C   | SER | 20 | -4.694 | 20.139 | 4.565  | 1.00 | 0.00 | TAG | C |
| ATOM | 341 | O   | SER | 20 | -4.354 | 20.737 | 5.605  | 1.00 | 0.00 | TAG | O |
| ATOM | 342 | CB  | SER | 20 | -7.080 | 19.303 | 4.668  | 1.00 | 0.00 | TAG | C |
| ATOM | 343 | OG  | SER | 20 | -7.265 | 19.673 | 6.038  | 1.00 | 0.00 | TAG | O |
| ATOM | 344 | H   | SER | 20 | -6.699 | 19.208 | 2.138  | 1.00 | 0.00 | TAG | H |
| ATOM | 345 | HA  | SER | 20 | -6.403 | 21.259 | 4.017  | 1.00 | 0.00 | TAG | H |
| ATOM | 346 | 2HB | SER | 20 | -6.783 | 18.239 | 4.609  | 1.00 | 0.00 | TAG | H |
| ATOM | 347 | 3HB | SER | 20 | -8.062 | 19.353 | 4.158  | 1.00 | 0.00 | TAG | H |
| ATOM | 348 | HG  | SER | 20 | -6.423 | 19.555 | 6.484  | 1.00 | 0.00 | TAG | H |
| ATOM | 349 | N   | HIS | 21 | -3.765 | 19.238 | 4.013  | 1.00 | 0.00 | TAG | N |
| ATOM | 350 | CA  | HIS | 21 | -2.436 | 19.103 | 4.602  | 1.00 | 0.00 | TAG | C |
| ATOM | 351 | C   | HIS | 21 | -1.363 | 19.193 | 3.545  | 1.00 | 0.00 | TAG | C |
| ATOM | 352 | O   | HIS | 21 | -0.120 | 18.996 | 3.732  | 1.00 | 0.00 | TAG | O |
| ATOM | 353 | CB  | HIS | 21 | -2.403 | 17.725 | 5.284  | 1.00 | 0.00 | TAG | C |
| ATOM | 354 | CG  | HIS | 21 | -1.157 | 17.520 | 6.094  | 1.00 | 0.00 | TAG | C |
| ATOM | 355 | CD2 | HIS | 21 | -1.077 | 17.840 | 7.443  | 1.00 | 0.00 | TAG | C |
| ATOM | 356 | ND1 | HIS | 21 | 0.046  | 16.998 | 5.623  | 1.00 | 0.00 | TAG | N |
| ATOM | 357 | CE1 | HIS | 21 | 0.778  | 17.050 | 6.751  | 1.00 | 0.00 | TAG | C |
| ATOM | 358 | NE2 | HIS | 21 | 0.186  | 17.534 | 7.877  | 1.00 | 0.00 | TAG | N |
| ATOM | 359 | H   | HIS | 21 | -4.011 | 18.699 | 3.231  | 1.00 | 0.00 | TAG | H |
| ATOM | 360 | HA  | HIS | 21 | -2.283 | 19.959 | 5.281  | 1.00 | 0.00 | TAG | H |
| ATOM | 361 | 2HB | HIS | 21 | -2.463 | 16.908 | 4.538  | 1.00 | 0.00 | TAG | H |
| ATOM | 362 | 3HB | HIS | 21 | -3.272 | 17.572 | 5.958  | 1.00 | 0.00 | TAG | H |
| ATOM | 363 | 2HD | HIS | 21 | -1.893 | 18.260 | 8.024  | 1.00 | 0.00 | TAG | H |
| ATOM | 364 | 1HE | HIS | 21 | 1.800  | 16.700 | 6.702  | 1.00 | 0.00 | TAG | H |
| ATOM | 365 | 2HE | HIS | 21 | 0.582  | 17.648 | 8.822  | 1.00 | 0.00 | TAG | H |
| ATOM | 366 | N   | ARG | 22 | -1.760 | 19.554 | 2.326  | 1.00 | 0.00 | TAG | N |
| ATOM | 367 | CA  | ARG | 22 | -0.847 | 19.917 | 1.247  | 1.00 | 0.00 | TAG | C |
| ATOM | 368 | C   | ARG | 22 | -0.559 | 21.400 | 1.259  | 1.00 | 0.00 | TAG | C |

|      |     |      |     |    |        |        |        |      |      |         |
|------|-----|------|-----|----|--------|--------|--------|------|------|---------|
| ATOM | 369 | O    | ARG | 22 | 0.570  | 21.785 | 1.397  | 1.00 | 0.00 | TAG O   |
| ATOM | 370 | CB   | ARG | 22 | -1.468 | 19.472 | -0.107 | 1.00 | 0.00 | TAG C   |
| ATOM | 371 | CG   | ARG | 22 | -0.619 | 19.788 | -1.370 | 1.00 | 0.00 | TAG C   |
| ATOM | 372 | CD   | ARG | 22 | 0.696  | 18.991 | -1.396 | 1.00 | 0.00 | TAG C   |
| ATOM | 373 | NE   | ARG | 22 | 0.398  | 17.534 | -1.519 | 1.00 | 0.00 | TAG N   |
| ATOM | 374 | CZ   | ARG | 22 | 1.293  | 16.556 | -1.427 | 1.00 | 0.00 | TAG C   |
| ATOM | 375 | NH1  | ARG | 22 | 2.563  | 16.757 | -1.208 | 1.00 | 0.00 | TAG N1+ |
| ATOM | 376 | NH2  | ARG | 22 | 0.885  | 15.333 | -1.563 | 1.00 | 0.00 | TAG N1+ |
| ATOM | 377 | H    | ARG | 22 | -2.744 | 19.565 | 2.149  | 1.00 | 0.00 | TAG H   |
| ATOM | 378 | HA   | ARG | 22 | 0.111  | 19.390 | 1.417  | 1.00 | 0.00 | TAG H   |
| ATOM | 379 | 2HB  | ARG | 22 | -2.476 | 19.926 | -0.203 | 1.00 | 0.00 | TAG H   |
| ATOM | 380 | 3HB  | ARG | 22 | -1.662 | 18.380 | -0.076 | 1.00 | 0.00 | TAG H   |
| ATOM | 381 | 2HG  | ARG | 22 | -0.414 | 20.878 | -1.407 | 1.00 | 0.00 | TAG H   |
| ATOM | 382 | 3HG  | ARG | 22 | -1.201 | 19.563 | -2.287 | 1.00 | 0.00 | TAG H   |
| ATOM | 383 | 2HD  | ARG | 22 | 1.272  | 19.202 | -0.468 | 1.00 | 0.00 | TAG H   |
| ATOM | 384 | 3HD  | ARG | 22 | 1.325  | 19.342 | -2.243 | 1.00 | 0.00 | TAG H   |
| ATOM | 385 | HE   | ARG | 22 | -0.557 | 17.204 | -1.691 | 1.00 | 0.00 | TAG H   |
| ATOM | 386 | 1HH1 | ARG | 22 | 2.818  | 17.742 | -1.110 | 1.00 | 0.00 | TAG H   |
| ATOM | 387 | 2HH1 | ARG | 22 | 3.187  | 15.951 | -1.152 | 1.00 | 0.00 | TAG H   |
| ATOM | 388 | H01  | ARG | 22 | 0.763  | 14.915 | -0.652 | 1.00 | 0.00 | TAG H   |
| ATOM | 389 | H02  | ARG | 22 | 1.569  | 14.806 | -2.087 | 1.00 | 0.00 | TAG H   |
| ATOM | 390 | H03  | ARG | 22 | 0.004  | 15.326 | -2.057 | 1.00 | 0.00 | TAG H   |
| ATOM | 391 | N    | GLY | 23 | -1.471 | 22.214 | 1.294  | 1.00 | 1.00 | TAG N   |
| ATOM | 392 | CA   | GLY | 23 | -1.339 | 23.657 | 1.119  | 1.00 | 1.00 | TAG C   |
| ATOM | 393 | C    | GLY | 23 | -0.234 | 23.998 | 0.120  | 1.00 | 1.00 | TAG C   |
| ATOM | 394 | O    | GLY | 23 | 0.574  | 24.897 | 0.364  | 1.00 | 1.00 | TAG O   |
| ATOM | 395 | H    | GLY | 23 | -2.427 | 21.949 | 1.413  | 1.00 | 1.00 | TAG H   |
| ATOM | 396 | 1HA  | GLY | 23 | -2.294 | 24.075 | 0.769  | 1.00 | 1.00 | TAG H   |
| ATOM | 397 | 2HA  | GLY | 23 | -1.118 | 24.127 | 2.088  | 1.00 | 1.00 | TAG H   |
| ATOM | 398 | N    | TYR | 24 | -0.189 | 23.319 | -0.988 | 1.00 | 0.00 | TAG N   |
| ATOM | 399 | CA   | TYR | 24 | 0.746  | 23.526 | -2.090 | 1.00 | 0.00 | TAG C   |
| ATOM | 400 | C    | TYR | 24 | 1.383  | 24.892 | -2.009 | 1.00 | 0.00 | TAG C   |
| ATOM | 401 | O    | TYR | 24 | 0.764  | 25.919 | -1.779 | 1.00 | 0.00 | TAG O   |
| ATOM | 402 | CB   | TYR | 24 | 0.019  | 23.416 | -3.463 | 1.00 | 0.00 | TAG C   |
| ATOM | 403 | CG   | TYR | 24 | 0.883  | 23.603 | -4.716 | 1.00 | 0.00 | TAG C   |
| ATOM | 404 | CD1  | TYR | 24 | 1.711  | 22.572 | -5.171 | 1.00 | 0.00 | TAG C   |
| ATOM | 405 | CD2  | TYR | 24 | 0.836  | 24.811 | -5.418 | 1.00 | 0.00 | TAG C   |
| ATOM | 406 | CE1  | TYR | 24 | 2.480  | 22.749 | -6.318 | 1.00 | 0.00 | TAG C   |
| ATOM | 407 | CE2  | TYR | 24 | 1.605  | 24.986 | -6.564 | 1.00 | 0.00 | TAG C   |
| ATOM | 408 | CZ   | TYR | 24 | 2.427  | 23.954 | -7.014 | 1.00 | 0.00 | TAG C   |
| ATOM | 409 | OH   | TYR | 24 | 3.180  | 24.122 | -8.141 | 1.00 | 0.00 | TAG O   |
| ATOM | 410 | OXT  | TYR | 24 | 2.804  | 25.013 | -2.212 | 0.00 | 0.00 | TAG O1- |
| ATOM | 411 | H    | TYR | 24 | -0.890 | 22.550 | -1.100 | 1.00 | 0.00 | TAG H   |
| ATOM | 412 | HA   | TYR | 24 | 1.551  | 22.771 | -2.025 | 1.00 | 0.00 | TAG H   |
| ATOM | 413 | 2HB  | TYR | 24 | -0.801 | 24.159 | -3.510 | 1.00 | 0.00 | TAG H   |
| ATOM | 414 | 3HB  | TYR | 24 | -0.511 | 22.443 | -3.520 | 1.00 | 0.00 | TAG H   |
| ATOM | 415 | 1HD  | TYR | 24 | 1.755  | 21.631 | -4.640 | 1.00 | 0.00 | TAG H   |
| ATOM | 416 | 2HD  | TYR | 24 | 0.192  | 25.612 | -5.081 | 1.00 | 0.00 | TAG H   |
| ATOM | 417 | 1HE  | TYR | 24 | 3.115  | 21.952 | -6.675 | 1.00 | 0.00 | TAG H   |
| ATOM | 418 | 2HE  | TYR | 24 | 1.555  | 25.921 | -7.101 | 1.00 | 0.00 | TAG H   |
| ATOM | 419 | HH   | TYR | 24 | 3.018  | 25.002 | -8.486 | 1.00 | 0.00 | TAG H   |

ATOM 420 H01 TYR 24 3.075 25.918 -2.046 0.00 0.00 TAG H  
END

**Histatin conformer 4:**

|      |    |     |     |   |        |        |        |      |      |         |
|------|----|-----|-----|---|--------|--------|--------|------|------|---------|
| ATOM | 1  | N   | ASP | 1 | -0.753 | -1.254 | -0.000 | 1.00 | 1.00 | TAG N1+ |
| ATOM | 2  | CA  | ASP | 1 | 0.000  | 0.000  | 0.000  | 1.00 | 1.00 | TAG C   |
| ATOM | 3  | C   | ASP | 1 | -0.977 | 1.169  | -0.000 | 1.00 | 1.00 | TAG C   |
| ATOM | 4  | O   | ASP | 1 | -0.980 | 1.990  | 0.930  | 1.00 | 1.00 | TAG O   |
| ATOM | 5  | CB  | ASP | 1 | 0.960  | 0.096  | -1.192 | 1.00 | 1.00 | TAG C   |
| ATOM | 6  | CG  | ASP | 1 | 1.888  | 1.333  | -1.129 | 1.00 | 1.00 | TAG C   |
| ATOM | 7  | OD1 | ASP | 1 | 2.076  | 1.945  | -0.042 | 1.00 | 1.00 | TAG O   |
| ATOM | 8  | OD2 | ASP | 1 | 2.445  | 1.694  | -2.194 | 1.00 | 1.00 | TAG O   |
| ATOM | 9  | 1H  | ASP | 1 | -0.117 | -2.025 | -0.000 | 1.00 | 1.00 | TAG H   |
| ATOM | 10 | 2H  | ASP | 1 | -1.329 | -1.298 | 0.816  | 1.00 | 1.00 | TAG H   |
| ATOM | 11 | 3H  | ASP | 1 | -1.329 | -1.298 | -0.816 | 1.00 | 1.00 | TAG H   |
| ATOM | 12 | HA  | ASP | 1 | 0.619  | 0.032  | 0.908  | 1.00 | 1.00 | TAG H   |
| ATOM | 13 | 1HB | ASP | 1 | 1.576  | -0.815 | -1.233 | 1.00 | 1.00 | TAG H   |
| ATOM | 14 | 2HB | ASP | 1 | 0.376  | 0.131  | -2.123 | 1.00 | 1.00 | TAG H   |
| ATOM | 15 | H01 | ASP | 1 | 2.490  | 2.653  | -2.223 | 1.00 | 1.00 | TAG H   |
| ATOM | 16 | N   | SER | 2 | -1.800 | 1.287  | -0.984 | 1.00 | 1.00 | TAG N   |
| ATOM | 17 | CA  | SER | 2 | -2.734 | 2.404  | -1.129 | 1.00 | 1.00 | TAG C   |
| ATOM | 18 | C   | SER | 2 | -3.968 | 2.304  | -0.244 | 1.00 | 1.00 | TAG C   |
| ATOM | 19 | O   | SER | 2 | -4.462 | 3.191  | 0.435  | 1.00 | 1.00 | TAG O   |
| ATOM | 20 | CB  | SER | 2 | -3.187 | 2.505  | -2.588 | 1.00 | 1.00 | TAG C   |
| ATOM | 21 | OG  | SER | 2 | -4.203 | 3.480  | -2.727 | 1.00 | 1.00 | TAG O   |
| ATOM | 22 | H   | SER | 2 | -1.859 | 0.619  | -1.726 | 1.00 | 1.00 | TAG H   |
| ATOM | 23 | HA  | SER | 2 | -2.185 | 3.300  | -0.809 | 1.00 | 1.00 | TAG H   |
| ATOM | 24 | 1HB | SER | 2 | -2.331 | 2.765  | -3.227 | 1.00 | 1.00 | TAG H   |
| ATOM | 25 | 2HB | SER | 2 | -3.559 | 1.528  | -2.932 | 1.00 | 1.00 | TAG H   |
| ATOM | 26 | HG  | SER | 2 | -4.486 | 3.535  | -3.685 | 1.00 | 1.00 | TAG H   |
| ATOM | 27 | N   | HIS | 3 | -4.575 | 1.039  | -0.256 | 1.00 | 0.00 | TAG N   |
| ATOM | 28 | CA  | HIS | 3 | -5.668 | 0.686  | 0.647  | 1.00 | 0.00 | TAG C   |
| ATOM | 29 | C   | HIS | 3 | -5.139 | 0.236  | 1.987  | 1.00 | 0.00 | TAG C   |
| ATOM | 30 | O   | HIS | 3 | -5.872 | -0.302 | 2.836  | 1.00 | 0.00 | TAG O   |
| ATOM | 31 | CB  | HIS | 3 | -6.441 | -0.454 | -0.035 | 1.00 | 0.00 | TAG C   |
| ATOM | 32 | CG  | HIS | 3 | -7.071 | -0.022 | -1.327 | 1.00 | 0.00 | TAG C   |
| ATOM | 33 | CD2 | HIS | 3 | -6.654 | -0.502 | -2.562 | 1.00 | 0.00 | TAG C   |
| ATOM | 34 | ND1 | HIS | 3 | -8.120 | 0.884  | -1.461 | 1.00 | 0.00 | TAG N   |
| ATOM | 35 | CE1 | HIS | 3 | -8.255 | 0.885  | -2.800 | 1.00 | 0.00 | TAG C   |
| ATOM | 36 | NE2 | HIS | 3 | -7.427 | 0.088  | -3.528 | 1.00 | 0.00 | TAG N   |
| ATOM | 37 | H   | HIS | 3 | -4.249 | 0.355  | -0.904 | 1.00 | 0.00 | TAG H   |
| ATOM | 38 | HA  | HIS | 3 | -6.257 | 1.601  | 0.832  | 1.00 | 0.00 | TAG H   |
| ATOM | 39 | 2HB | HIS | 3 | -7.245 | -0.842 | 0.622  | 1.00 | 0.00 | TAG H   |
| ATOM | 40 | 3HB | HIS | 3 | -5.793 | -1.328 | -0.253 | 1.00 | 0.00 | TAG H   |
| ATOM | 41 | 2HD | HIS | 3 | -5.852 | -1.220 | -2.704 | 1.00 | 0.00 | TAG H   |
| ATOM | 42 | 1HE | HIS | 3 | -9.021 | 1.520  | -3.226 | 1.00 | 0.00 | TAG H   |
| ATOM | 43 | 2HE | HIS | 3 | -7.383 | -0.043 | -4.549 | 1.00 | 0.00 | TAG H   |
| ATOM | 44 | N   | ALA | 4 | -3.830 | 0.419  | 2.228  | 1.00 | 1.00 | TAG N   |
| ATOM | 45 | CA  | ALA | 4 | -3.190 | 0.008  | 3.463  | 1.00 | 1.00 | TAG C   |
| ATOM | 46 | C   | ALA | 4 | -3.809 | 0.768  | 4.649  | 1.00 | 1.00 | TAG C   |

|      |    |      |     |   |         |        |       |      |      |     |     |
|------|----|------|-----|---|---------|--------|-------|------|------|-----|-----|
| ATOM | 47 | O    | ALA | 4 | -4.177  | 0.150  | 5.644 | 1.00 | 1.00 | TAG | O   |
| ATOM | 48 | CB   | ALA | 4 | -1.692  | 0.293  | 3.380 | 1.00 | 1.00 | TAG | C   |
| ATOM | 49 | H    | ALA | 4 | -3.206  | 0.846  | 1.573 | 1.00 | 1.00 | TAG | H   |
| ATOM | 50 | HA   | ALA | 4 | -3.344  | -1.070 | 3.614 | 1.00 | 1.00 | TAG | H   |
| ATOM | 51 | 1HB  | ALA | 4 | -1.206  | -0.019 | 4.318 | 1.00 | 1.00 | TAG | H   |
| ATOM | 52 | 2HB  | ALA | 4 | -1.258  | -0.266 | 2.539 | 1.00 | 1.00 | TAG | H   |
| ATOM | 53 | 3HB  | ALA | 4 | -1.531  | 1.370  | 3.225 | 1.00 | 1.00 | TAG | H   |
| ATOM | 54 | N    | LYS | 5 | -3.928  | 2.052  | 4.577 | 1.00 | 0.00 | TAG | N   |
| ATOM | 55 | CA   | LYS | 5 | -4.539  | 2.837  | 5.645 | 1.00 | 0.00 | TAG | C   |
| ATOM | 56 | C    | LYS | 5 | -5.987  | 2.453  | 5.839 | 1.00 | 0.00 | TAG | C   |
| ATOM | 57 | O    | LYS | 5 | -6.497  | 2.520  | 6.939 | 1.00 | 0.00 | TAG | O   |
| ATOM | 58 | CB   | LYS | 5 | -4.404  | 4.349  | 5.317 | 1.00 | 0.00 | TAG | C   |
| ATOM | 59 | CG   | LYS | 5 | -5.264  | 4.796  | 4.109 | 1.00 | 0.00 | TAG | C   |
| ATOM | 60 | CD   | LYS | 5 | -5.163  | 6.285  | 3.762 | 1.00 | 0.00 | TAG | C   |
| ATOM | 61 | CE   | LYS | 5 | -6.093  | 6.593  | 2.581 | 1.00 | 0.00 | TAG | C   |
| ATOM | 62 | NZ   | LYS | 5 | -5.966  | 8.015  | 2.216 | 1.00 | 0.00 | TAG | N   |
| ATOM | 63 | H    | LYS | 5 | -3.592  | 2.522  | 3.765 | 1.00 | 0.00 | TAG | H   |
| ATOM | 64 | HA   | LYS | 5 | -4.008  | 2.615  | 6.589 | 1.00 | 0.00 | TAG | H   |
| ATOM | 65 | 2HB  | LYS | 5 | -3.338  | 4.597  | 5.134 | 1.00 | 0.00 | TAG | H   |
| ATOM | 66 | 3HB  | LYS | 5 | -4.687  | 4.950  | 6.205 | 1.00 | 0.00 | TAG | H   |
| ATOM | 67 | 2HG  | LYS | 5 | -6.322  | 4.520  | 4.283 | 1.00 | 0.00 | TAG | H   |
| ATOM | 68 | 3HG  | LYS | 5 | -4.962  | 4.244  | 3.200 | 1.00 | 0.00 | TAG | H   |
| ATOM | 69 | 2HD  | LYS | 5 | -4.116  | 6.539  | 3.501 | 1.00 | 0.00 | TAG | H   |
| ATOM | 70 | 3HD  | LYS | 5 | -5.421  | 6.894  | 4.649 | 1.00 | 0.00 | TAG | H   |
| ATOM | 71 | 2HE  | LYS | 5 | -7.150  | 6.367  | 2.833 | 1.00 | 0.00 | TAG | H   |
| ATOM | 72 | 3HE  | LYS | 5 | -5.844  | 5.947  | 1.712 | 1.00 | 0.00 | TAG | H   |
| ATOM | 73 | H01  | LYS | 5 | -6.081  | 8.586  | 3.041 | 1.00 | 0.00 | TAG | H   |
| ATOM | 74 | H02  | LYS | 5 | -6.677  | 8.254  | 1.539 | 1.00 | 0.00 | TAG | H   |
| ATOM | 75 | N    | ARG | 6 | -6.652  | 2.048  | 4.778 | 1.00 | 1.00 | TAG | N   |
| ATOM | 76 | CA   | ARG | 6 | -8.032  | 1.534  | 4.840 | 1.00 | 1.00 | TAG | C   |
| ATOM | 77 | C    | ARG | 6 | -8.060  | 0.166  | 5.503 | 1.00 | 1.00 | TAG | C   |
| ATOM | 78 | O    | ARG | 6 | -8.881  | -0.091 | 6.396 | 1.00 | 1.00 | TAG | O   |
| ATOM | 79 | CB   | ARG | 6 | -8.695  | 1.451  | 3.458 | 1.00 | 1.00 | TAG | C   |
| ATOM | 80 | CG   | ARG | 6 | -8.946  | 2.781  | 2.808 | 1.00 | 1.00 | TAG | C   |
| ATOM | 81 | CD   | ARG | 6 | -9.965  | 3.594  | 3.568 | 1.00 | 1.00 | TAG | C   |
| ATOM | 82 | NE   | ARG | 6 | -9.802  | 5.015  | 3.277 | 1.00 | 1.00 | TAG | N   |
| ATOM | 83 | CZ   | ARG | 6 | -10.795 | 5.896  | 3.236 | 1.00 | 1.00 | TAG | C   |
| ATOM | 84 | NH1  | ARG | 6 | -12.059 | 5.500  | 3.403 | 1.00 | 1.00 | TAG | N   |
| ATOM | 85 | NH2  | ARG | 6 | -10.526 | 7.171  | 2.963 | 1.00 | 1.00 | TAG | N1+ |
| ATOM | 86 | H    | ARG | 6 | -6.268  | 2.055  | 3.855 | 1.00 | 1.00 | TAG | H   |
| ATOM | 87 | HA   | ARG | 6 | -8.609  | 2.252  | 5.441 | 1.00 | 1.00 | TAG | H   |
| ATOM | 88 | 1HB  | ARG | 6 | -8.057  | 0.848  | 2.795 | 1.00 | 1.00 | TAG | H   |
| ATOM | 89 | 2HB  | ARG | 6 | -9.652  | 0.918  | 3.556 | 1.00 | 1.00 | TAG | H   |
| ATOM | 90 | 1HG  | ARG | 6 | -8.002  | 3.342  | 2.744 | 1.00 | 1.00 | TAG | H   |
| ATOM | 91 | 2HG  | ARG | 6 | -9.298  | 2.625  | 1.776 | 1.00 | 1.00 | TAG | H   |
| ATOM | 92 | 1HD  | ARG | 6 | -10.980 | 3.272  | 3.295 | 1.00 | 1.00 | TAG | H   |
| ATOM | 93 | 2HD  | ARG | 6 | -9.851  | 3.420  | 4.649 | 1.00 | 1.00 | TAG | H   |
| ATOM | 94 | HE   | ARG | 6 | -8.877  | 5.349  | 3.094 | 1.00 | 1.00 | TAG | H   |
| ATOM | 95 | 1HH1 | ARG | 6 | -12.263 | 4.533  | 3.559 | 1.00 | 1.00 | TAG | H   |
| ATOM | 96 | 2HH1 | ARG | 6 | -12.801 | 6.169  | 3.372 | 1.00 | 1.00 | TAG | H   |
| ATOM | 97 | H01  | ARG | 6 | -10.510 | 7.703  | 3.821 | 1.00 | 1.00 | TAG | H   |

|      |     |     |     |    |         |        |        |      |      |     |   |
|------|-----|-----|-----|----|---------|--------|--------|------|------|-----|---|
| ATOM | 98  | H02 | ARG | 6  | -11.237 | 7.542  | 2.350  | 1.00 | 1.00 | TAG | H |
| ATOM | 99  | H03 | ARG | 6  | -9.625  | 7.235  | 2.511  | 1.00 | 1.00 | TAG | H |
| ATOM | 100 | N   | HIS | 7  | -7.185  | -0.745 | 5.103  | 1.00 | 1.00 | TAG | N |
| ATOM | 101 | CA  | HIS | 7  | -7.144  | -2.101 | 5.631  | 1.00 | 1.00 | TAG | C |
| ATOM | 102 | C   | HIS | 7  | -6.490  | -2.238 | 7.007  | 1.00 | 1.00 | TAG | C |
| ATOM | 103 | O   | HIS | 7  | -6.984  | -2.949 | 7.894  | 1.00 | 1.00 | TAG | O |
| ATOM | 104 | CB  | HIS | 7  | -6.522  | -3.057 | 4.621  | 1.00 | 1.00 | TAG | C |
| ATOM | 105 | CG  | HIS | 7  | -7.474  | -3.485 | 3.551  | 1.00 | 1.00 | TAG | C |
| ATOM | 106 | CD2 | HIS | 7  | -7.563  | -2.847 | 2.332  | 1.00 | 1.00 | TAG | C |
| ATOM | 107 | ND1 | HIS | 7  | -8.407  | -4.472 | 3.524  | 1.00 | 1.00 | TAG | N |
| ATOM | 108 | CE1 | HIS | 7  | -9.035  | -4.409 | 2.307  | 1.00 | 1.00 | TAG | C |
| ATOM | 109 | NE2 | HIS | 7  | -8.510  | -3.420 | 1.601  | 1.00 | 1.00 | TAG | N |
| ATOM | 110 | H   | HIS | 7  | -6.489  | -0.565 | 4.408  | 1.00 | 1.00 | TAG | H |
| ATOM | 111 | HA  | HIS | 7  | -8.195  | -2.380 | 5.796  | 1.00 | 1.00 | TAG | H |
| ATOM | 112 | 1HB | HIS | 7  | -5.652  | -2.572 | 4.155  | 1.00 | 1.00 | TAG | H |
| ATOM | 113 | 2HB | HIS | 7  | -6.150  | -3.948 | 5.149  | 1.00 | 1.00 | TAG | H |
| ATOM | 114 | HD1 | HIS | 7  | -8.599  | -5.124 | 4.257  | 1.00 | 1.00 | TAG | H |
| ATOM | 115 | HD2 | HIS | 7  | -6.945  | -1.994 | 2.015  | 1.00 | 1.00 | TAG | H |
| ATOM | 116 | HE1 | HIS | 7  | -9.845  | -5.073 | 1.972  | 1.00 | 1.00 | TAG | H |
| ATOM | 117 | N   | HIS | 8  | -5.313  | -1.535 | 7.217  | 1.00 | 0.00 | TAG | N |
| ATOM | 118 | CA  | HIS | 8  | -4.595  | -1.726 | 8.474  | 1.00 | 0.00 | TAG | C |
| ATOM | 119 | C   | HIS | 8  | -4.178  | -0.402 | 9.067  | 1.00 | 0.00 | TAG | C |
| ATOM | 120 | O   | HIS | 8  | -3.204  | -0.361 | 9.879  | 1.00 | 0.00 | TAG | O |
| ATOM | 121 | CB  | HIS | 8  | -3.359  | -2.578 | 8.140  | 1.00 | 0.00 | TAG | C |
| ATOM | 122 | CG  | HIS | 8  | -3.727  | -3.930 | 7.602  | 1.00 | 0.00 | TAG | C |
| ATOM | 123 | CD2 | HIS | 8  | -3.556  | -4.278 | 6.269  | 1.00 | 0.00 | TAG | C |
| ATOM | 124 | ND1 | HIS | 8  | -4.269  | -4.981 | 8.337  | 1.00 | 0.00 | TAG | N |
| ATOM | 125 | CE1 | HIS | 8  | -4.391  | -5.904 | 7.365  | 1.00 | 0.00 | TAG | C |
| ATOM | 126 | NE2 | HIS | 8  | -3.989  | -5.569 | 6.109  | 1.00 | 0.00 | TAG | N |
| ATOM | 127 | H   | HIS | 8  | -4.969  | -0.919 | 6.534  | 1.00 | 0.00 | TAG | H |
| ATOM | 128 | HA  | HIS | 8  | -5.295  | -2.187 | 9.192  | 1.00 | 0.00 | TAG | H |
| ATOM | 129 | 2HB | HIS | 8  | -2.723  | -2.730 | 9.035  | 1.00 | 0.00 | TAG | H |
| ATOM | 130 | 3HB | HIS | 8  | -2.702  | -2.086 | 7.393  | 1.00 | 0.00 | TAG | H |
| ATOM | 131 | 2HD | HIS | 8  | -3.148  | -3.618 | 5.508  | 1.00 | 0.00 | TAG | H |
| ATOM | 132 | 1HE | HIS | 8  | -4.801  | -6.867 | 7.637  | 1.00 | 0.00 | TAG | H |
| ATOM | 133 | 2HE | HIS | 8  | -4.004  | -6.136 | 5.249  | 1.00 | 0.00 | TAG | H |
| ATOM | 134 | N   | GLY | 9  | -5.081  | 0.623  | 8.884  | 1.00 | 1.00 | TAG | N |
| ATOM | 135 | CA  | GLY | 9  | -5.005  | 1.924  | 9.573  | 1.00 | 1.00 | TAG | C |
| ATOM | 136 | C   | GLY | 9  | -3.638  | 2.615  | 9.473  | 1.00 | 1.00 | TAG | C |
| ATOM | 137 | O01 | GLY | 9  | -3.828  | 3.956  | 9.933  | 1.00 | 1.00 | TAG | O |
| ATOM | 138 | H   | GLY | 9  | -5.848  | 0.547  | 8.246  | 1.00 | 1.00 | TAG | H |
| ATOM | 139 | 1HA | GLY | 9  | -5.771  | 2.592  | 9.153  | 1.00 | 1.00 | TAG | H |
| ATOM | 140 | 2HA | GLY | 9  | -5.251  | 1.778  | 10.635 | 1.00 | 1.00 | TAG | H |
| ATOM | 141 | N   | TYR | 10 | -3.150  | 2.707  | 8.232  | 1.00 | 0.00 | TAG | N |
| ATOM | 142 | CA  | TYR | 10 | -1.760  | 3.116  | 8.046  | 1.00 | 0.00 | TAG | C |
| ATOM | 143 | C   | TYR | 10 | -0.961  | 2.903  | 9.309  | 1.00 | 0.00 | TAG | C |
| ATOM | 144 | O   | TYR | 10 | 0.161   | 3.347  | 9.417  | 1.00 | 0.00 | TAG | O |
| ATOM | 145 | CB  | TYR | 10 | -1.671  | 4.624  | 7.670  | 1.00 | 0.00 | TAG | C |
| ATOM | 146 | CG  | TYR | 10 | -2.177  | 5.625  | 8.715  | 1.00 | 0.00 | TAG | C |
| ATOM | 147 | CD1 | TYR | 10 | -1.311  | 6.144  | 9.683  | 1.00 | 0.00 | TAG | C |
| ATOM | 148 | CD2 | TYR | 10 | -3.514  | 6.033  | 8.697  | 1.00 | 0.00 | TAG | C |

|      |     |     |     |    |        |        |        |      |      |     |     |
|------|-----|-----|-----|----|--------|--------|--------|------|------|-----|-----|
| ATOM | 149 | CE1 | TYR | 10 | -1.779 | 7.064  | 10.617 | 1.00 | 0.00 | TAG | C   |
| ATOM | 150 | CE2 | TYR | 10 | -3.980 | 6.952  | 9.632  | 1.00 | 0.00 | TAG | C   |
| ATOM | 151 | CZ  | TYR | 10 | -3.111 | 7.467  | 10.592 | 1.00 | 0.00 | TAG | C   |
| ATOM | 152 | OH  | TYR | 10 | -3.565 | 8.372  | 11.509 | 1.00 | 0.00 | TAG | O   |
| ATOM | 153 | H   | TYR | 10 | -3.709 | 2.504  | 7.467  | 1.00 | 0.00 | TAG | H   |
| ATOM | 154 | HA  | TYR | 10 | -1.308 | 2.497  | 7.249  | 1.00 | 0.00 | TAG | H   |
| ATOM | 155 | 2HB | TYR | 10 | -2.234 | 4.808  | 6.733  | 1.00 | 0.00 | TAG | H   |
| ATOM | 156 | 3HB | TYR | 10 | -0.625 | 4.872  | 7.395  | 1.00 | 0.00 | TAG | H   |
| ATOM | 157 | 1HD | TYR | 10 | -0.273 | 5.841  | 9.707  | 1.00 | 0.00 | TAG | H   |
| ATOM | 158 | 2HD | TYR | 10 | -4.191 | 5.646  | 7.947  | 1.00 | 0.00 | TAG | H   |
| ATOM | 159 | 1HE | TYR | 10 | -1.110 | 7.470  | 11.362 | 1.00 | 0.00 | TAG | H   |
| ATOM | 160 | 2HE | TYR | 10 | -5.013 | 7.264  | 9.603  | 1.00 | 0.00 | TAG | H   |
| ATOM | 161 | HH  | TYR | 10 | -4.496 | 8.533  | 11.341 | 1.00 | 0.00 | TAG | H   |
| ATOM | 162 | N   | LYS | 11 | -1.401 | 2.249  | 10.256 | 1.00 | 1.00 | TAG | N   |
| ATOM | 163 | CA  | LYS | 11 | -0.665 | 1.953  | 11.480 | 1.00 | 1.00 | TAG | C   |
| ATOM | 164 | C   | LYS | 11 | 0.295  | 0.806  | 11.231 | 1.00 | 1.00 | TAG | C   |
| ATOM | 165 | O   | LYS | 11 | 1.415  | 0.834  | 11.763 | 1.00 | 1.00 | TAG | O   |
| ATOM | 166 | CB  | LYS | 11 | -1.640 | 1.597  | 12.603 | 1.00 | 1.00 | TAG | C   |
| ATOM | 167 | CG  | LYS | 11 | -0.995 | 1.325  | 13.947 | 1.00 | 1.00 | TAG | C   |
| ATOM | 168 | CD  | LYS | 11 | -2.008 | 1.568  | 15.051 | 1.00 | 1.00 | TAG | C   |
| ATOM | 169 | CE  | LYS | 11 | -1.443 | 1.284  | 16.429 | 1.00 | 1.00 | TAG | C   |
| ATOM | 170 | NZ  | LYS | 11 | -1.417 | -0.171 | 16.683 | 1.00 | 1.00 | TAG | N   |
| ATOM | 171 | HA  | LYS | 11 | -0.090 | 2.840  | 11.783 | 1.00 | 1.00 | TAG | H   |
| ATOM | 172 | 1HB | LYS | 11 | -2.360 | 2.421  | 12.719 | 1.00 | 1.00 | TAG | H   |
| ATOM | 173 | 2HB | LYS | 11 | -2.213 | 0.707  | 12.303 | 1.00 | 1.00 | TAG | H   |
| ATOM | 174 | 1HG | LYS | 11 | -0.630 | 0.289  | 13.989 | 1.00 | 1.00 | TAG | H   |
| ATOM | 175 | 2HG | LYS | 11 | -0.121 | 1.979  | 14.086 | 1.00 | 1.00 | TAG | H   |
| ATOM | 176 | 1HD | LYS | 11 | -2.351 | 2.612  | 15.007 | 1.00 | 1.00 | TAG | H   |
| ATOM | 177 | 2HD | LYS | 11 | -2.890 | 0.932  | 14.881 | 1.00 | 1.00 | TAG | H   |
| ATOM | 178 | 1HE | LYS | 11 | -0.427 | 1.696  | 16.507 | 1.00 | 1.00 | TAG | H   |
| ATOM | 179 | 2HE | LYS | 11 | -2.053 | 1.787  | 17.193 | 1.00 | 1.00 | TAG | H   |
| ATOM | 180 | H01 | LYS | 11 | -2.342 | 1.891  | 10.179 | 1.00 | 1.00 | TAG | H   |
| ATOM | 181 | H02 | LYS | 11 | -1.009 | -0.645 | 15.890 | 1.00 | 1.00 | TAG | H   |
| ATOM | 182 | H03 | LYS | 11 | -2.359 | -0.505 | 16.827 | 1.00 | 1.00 | TAG | H   |
| ATOM | 183 | N   | ARG | 12 | -0.065 | -0.171 | 10.549 | 1.00 | 0.00 | TAG | N   |
| ATOM | 184 | CA  | ARG | 12 | 0.890  | -1.180 | 10.097 | 1.00 | 0.00 | TAG | C   |
| ATOM | 185 | C   | ARG | 12 | 2.144  | -0.534 | 9.558  | 1.00 | 0.00 | TAG | C   |
| ATOM | 186 | O   | ARG | 12 | 2.997  | -1.319 | 8.993  | 1.00 | 0.00 | TAG | O   |
| ATOM | 187 | CB  | ARG | 12 | 0.205  | -2.073 | 9.024  | 1.00 | 0.00 | TAG | C   |
| ATOM | 188 | CG  | ARG | 12 | -1.007 | -2.909 | 9.523  | 1.00 | 0.00 | TAG | C   |
| ATOM | 189 | CD  | ARG | 12 | -0.569 | -4.232 | 10.171 | 1.00 | 0.00 | TAG | C   |
| ATOM | 190 | NE  | ARG | 12 | -0.123 | -3.980 | 11.573 | 1.00 | 0.00 | TAG | N   |
| ATOM | 191 | CZ  | ARG | 12 | 0.618  | -4.808 | 12.305 | 1.00 | 0.00 | TAG | C   |
| ATOM | 192 | NH1 | ARG | 12 | 1.056  | -5.957 | 11.873 | 1.00 | 0.00 | TAG | N   |
| ATOM | 193 | NH2 | ARG | 12 | 0.922  | -4.455 | 13.514 | 1.00 | 0.00 | TAG | N1+ |
| ATOM | 194 | H   | ARG | 12 | -0.989 | -0.264 | 10.315 | 1.00 | 0.00 | TAG | H   |
| ATOM | 195 | HA  | ARG | 12 | 1.179  | -1.793 | 10.972 | 1.00 | 0.00 | TAG | H   |
| ATOM | 196 | 2HB | ARG | 12 | 0.969  | -2.741 | 8.576  | 1.00 | 0.00 | TAG | H   |
| ATOM | 197 | 3HB | ARG | 12 | -0.129 | -1.435 | 8.180  | 1.00 | 0.00 | TAG | H   |
| ATOM | 198 | 2HG | ARG | 12 | -1.692 | -3.101 | 8.671  | 1.00 | 0.00 | TAG | H   |
| ATOM | 199 | 3HG | ARG | 12 | -1.599 | -2.321 | 10.254 | 1.00 | 0.00 | TAG | H   |

|      |     |      |     |    |        |        |        |      |      |       |
|------|-----|------|-----|----|--------|--------|--------|------|------|-------|
| ATOM | 200 | 2HD  | ARG | 12 | 0.250  | -4.683 | 9.569  | 1.00 | 0.00 | TAG H |
| ATOM | 201 | 3HD  | ARG | 12 | -1.412 | -4.955 | 10.146 | 1.00 | 0.00 | TAG H |
| ATOM | 202 | HE   | ARG | 12 | -0.381 | -3.117 | 12.062 | 1.00 | 0.00 | TAG H |
| ATOM | 203 | 1HH1 | ARG | 12 | 0.781  | -6.174 | 10.912 | 1.00 | 0.00 | TAG H |
| ATOM | 204 | 2HH1 | ARG | 12 | 1.619  | -6.537 | 12.497 | 1.00 | 0.00 | TAG H |
| ATOM | 205 | H01  | ARG | 12 | 1.195  | -5.271 | 14.044 | 1.00 | 0.00 | TAG H |
| ATOM | 206 | H02  | ARG | 12 | 0.122  | -4.021 | 13.950 | 1.00 | 0.00 | TAG H |
| ATOM | 207 | H03  | ARG | 12 | 1.689  | -3.799 | 13.489 | 1.00 | 0.00 | TAG H |
| ATOM | 208 | N    | LYS | 13 | 2.255  | 0.671  | 9.441  | 1.00 | 0.00 | TAG N |
| ATOM | 209 | CA   | LYS | 13 | 3.363  | 1.322  | 8.748  | 1.00 | 0.00 | TAG C |
| ATOM | 210 | C    | LYS | 13 | 4.692  | 0.811  | 9.252  | 1.00 | 0.00 | TAG C |
| ATOM | 211 | O    | LYS | 13 | 5.717  | 0.999  | 8.582  | 1.00 | 0.00 | TAG O |
| ATOM | 212 | CB   | LYS | 13 | 3.254  | 2.860  | 8.931  | 1.00 | 0.00 | TAG C |
| ATOM | 213 | CG   | LYS | 13 | 4.326  | 3.652  | 8.140  | 1.00 | 0.00 | TAG C |
| ATOM | 214 | CD   | LYS | 13 | 4.173  | 5.175  | 8.196  | 1.00 | 0.00 | TAG C |
| ATOM | 215 | CE   | LYS | 13 | 5.306  | 5.826  | 7.392  | 1.00 | 0.00 | TAG C |
| ATOM | 216 | NZ   | LYS | 13 | 5.158  | 7.292  | 7.435  | 1.00 | 0.00 | TAG N |
| ATOM | 217 | H    | LYS | 13 | 1.561  | 1.266  | 9.839  | 1.00 | 0.00 | TAG H |
| ATOM | 218 | HA   | LYS | 13 | 3.297  | 1.072  | 7.672  | 1.00 | 0.00 | TAG H |
| ATOM | 219 | 2HB  | LYS | 13 | 3.318  | 3.113  | 10.009 | 1.00 | 0.00 | TAG H |
| ATOM | 220 | 3HB  | LYS | 13 | 2.248  | 3.203  | 8.618  | 1.00 | 0.00 | TAG H |
| ATOM | 221 | 2HG  | LYS | 13 | 4.336  | 3.312  | 7.086  | 1.00 | 0.00 | TAG H |
| ATOM | 222 | 3HG  | LYS | 13 | 5.335  | 3.426  | 8.533  | 1.00 | 0.00 | TAG H |
| ATOM | 223 | 2HD  | LYS | 13 | 4.207  | 5.517  | 9.251  | 1.00 | 0.00 | TAG H |
| ATOM | 224 | 3HD  | LYS | 13 | 3.180  | 5.467  | 7.805  | 1.00 | 0.00 | TAG H |
| ATOM | 225 | 2HE  | LYS | 13 | 5.297  | 5.483  | 6.336  | 1.00 | 0.00 | TAG H |
| ATOM | 226 | 3HE  | LYS | 13 | 6.294  | 5.525  | 7.799  | 1.00 | 0.00 | TAG H |
| ATOM | 227 | H01  | LYS | 13 | 5.138  | 7.656  | 6.494  | 1.00 | 0.00 | TAG H |
| ATOM | 228 | H02  | LYS | 13 | 5.936  | 7.695  | 7.937  | 1.00 | 0.00 | TAG H |
| ATOM | 229 | N    | PHE | 14 | 4.769  | 0.196  | 10.377 | 1.00 | 1.00 | TAG N |
| ATOM | 230 | CA   | PHE | 14 | 5.987  | -0.446 | 10.867 | 1.00 | 1.00 | TAG C |
| ATOM | 231 | C    | PHE | 14 | 6.509  | -1.531 | 9.932  | 1.00 | 1.00 | TAG C |
| ATOM | 232 | O    | PHE | 14 | 7.694  | -1.873 | 9.976  | 1.00 | 1.00 | TAG O |
| ATOM | 233 | CB   | PHE | 14 | 5.796  | -0.980 | 12.287 | 1.00 | 1.00 | TAG C |
| ATOM | 234 | CG   | PHE | 14 | 5.481  | 0.093  | 13.294 | 1.00 | 1.00 | TAG C |
| ATOM | 235 | CD1  | PHE | 14 | 4.236  | 0.137  | 13.916 | 1.00 | 1.00 | TAG C |
| ATOM | 236 | CD2  | PHE | 14 | 6.425  | 1.079  | 13.603 | 1.00 | 1.00 | TAG C |
| ATOM | 237 | CE1  | PHE | 14 | 3.935  | 1.138  | 14.843 | 1.00 | 1.00 | TAG C |
| ATOM | 238 | CE2  | PHE | 14 | 6.138  | 2.085  | 14.531 | 1.00 | 1.00 | TAG C |
| ATOM | 239 | CZ   | PHE | 14 | 4.890  | 2.115  | 15.153 | 1.00 | 1.00 | TAG C |
| ATOM | 240 | H    | PHE | 14 | 3.993  | 0.107  | 11.002 | 1.00 | 1.00 | TAG H |
| ATOM | 241 | HA   | PHE | 14 | 6.762  | 0.335  | 10.892 | 1.00 | 1.00 | TAG H |
| ATOM | 242 | 1HB  | PHE | 14 | 4.983  | -1.721 | 12.286 | 1.00 | 1.00 | TAG H |
| ATOM | 243 | 2HB  | PHE | 14 | 6.711  | -1.507 | 12.599 | 1.00 | 1.00 | TAG H |
| ATOM | 244 | HD1  | PHE | 14 | 3.481  | -0.627 | 13.675 | 1.00 | 1.00 | TAG H |
| ATOM | 245 | HD2  | PHE | 14 | 7.407  | 1.063  | 13.108 | 1.00 | 1.00 | TAG H |
| ATOM | 246 | HE1  | PHE | 14 | 2.948  | 1.160  | 15.329 | 1.00 | 1.00 | TAG H |
| ATOM | 247 | HE2  | PHE | 14 | 6.893  | 2.848  | 14.769 | 1.00 | 1.00 | TAG H |
| ATOM | 248 | HZ   | PHE | 14 | 4.658  | 2.903  | 15.884 | 1.00 | 1.00 | TAG H |
| ATOM | 249 | N    | HIS | 15 | 5.614  | -2.075 | 9.077  | 1.00 | 0.00 | TAG N |
| ATOM | 250 | CA   | HIS | 15 | 5.982  | -3.068 | 8.071  | 1.00 | 0.00 | TAG C |



|      |     |     |     |    |        |        |        |      |      |         |
|------|-----|-----|-----|----|--------|--------|--------|------|------|---------|
| ATOM | 251 | C   | HIS | 15 | 7.011  | -2.515 | 7.115  | 1.00 | 0.00 | TAG C   |
| ATOM | 252 | O   | HIS | 15 | 7.314  | -3.107 | 6.063  | 1.00 | 0.00 | TAG O   |
| ATOM | 253 | CB  | HIS | 15 | 4.688  | -3.422 | 7.320  | 1.00 | 0.00 | TAG C   |
| ATOM | 254 | CG  | HIS | 15 | 4.205  | -2.296 | 6.454  | 1.00 | 0.00 | TAG C   |
| ATOM | 255 | CD2 | HIS | 15 | 4.487  | -2.219 | 5.096  | 1.00 | 0.00 | TAG C   |
| ATOM | 256 | ND1 | HIS | 15 | 3.436  | -1.213 | 6.876  | 1.00 | 0.00 | TAG N   |
| ATOM | 257 | CE1 | HIS | 15 | 3.315  | -0.548 | 5.712  | 1.00 | 0.00 | TAG C   |
| ATOM | 258 | NE2 | HIS | 15 | 3.906  | -1.078 | 4.607  | 1.00 | 0.00 | TAG N   |
| ATOM | 259 | H   | HIS | 15 | 4.652  | -1.856 | 8.989  | 1.00 | 0.00 | TAG H   |
| ATOM | 260 | HA  | HIS | 15 | 6.460  | -3.913 | 8.595  | 1.00 | 0.00 | TAG H   |
| ATOM | 261 | 2HB | HIS | 15 | 3.874  | -3.682 | 8.026  | 1.00 | 0.00 | TAG H   |
| ATOM | 262 | 3HB | HIS | 15 | 4.812  | -4.315 | 6.672  | 1.00 | 0.00 | TAG H   |
| ATOM | 263 | 2HD | HIS | 15 | 5.070  | -2.953 | 4.547  | 1.00 | 0.00 | TAG H   |
| ATOM | 264 | 1HE | HIS | 15 | 2.749  | 0.374  | 5.718  | 1.00 | 0.00 | TAG H   |
| ATOM | 265 | 2HE | HIS | 15 | 3.921  | -0.718 | 3.642  | 1.00 | 0.00 | TAG H   |
| ATOM | 266 | N   | GLU | 16 | 7.606  | -1.350 | 7.408  | 1.00 | 1.00 | TAG N   |
| ATOM | 267 | CA  | GLU | 16 | 8.530  | -0.659 | 6.513  | 1.00 | 1.00 | TAG C   |
| ATOM | 268 | C   | GLU | 16 | 9.885  | -1.352 | 6.570  | 1.00 | 1.00 | TAG C   |
| ATOM | 269 | O   | GLU | 16 | 10.654 | -1.271 | 5.598  | 1.00 | 1.00 | TAG O   |
| ATOM | 270 | CB  | GLU | 16 | 8.690  | 0.797  | 6.935  | 1.00 | 1.00 | TAG C   |
| ATOM | 271 | CG  | GLU | 16 | 9.566  | 1.617  | 6.003  | 1.00 | 1.00 | TAG C   |
| ATOM | 272 | CD  | GLU | 16 | 9.902  | 2.987  | 6.562  | 1.00 | 1.00 | TAG C   |
| ATOM | 273 | OE1 | GLU | 16 | 9.762  | 3.187  | 7.787  | 1.00 | 1.00 | TAG O   |
| ATOM | 274 | OE2 | GLU | 16 | 10.343 | 3.866  | 5.786  | 1.00 | 1.00 | TAG O   |
| ATOM | 275 | H   | GLU | 16 | 7.452  | -0.865 | 8.268  | 1.00 | 1.00 | TAG H   |
| ATOM | 276 | HA  | GLU | 16 | 8.130  | -0.688 | 5.489  | 1.00 | 1.00 | TAG H   |
| ATOM | 277 | 1HB | GLU | 16 | 7.695  | 1.263  | 6.991  | 1.00 | 1.00 | TAG H   |
| ATOM | 278 | 2HB | GLU | 16 | 9.118  | 0.830  | 7.948  | 1.00 | 1.00 | TAG H   |
| ATOM | 279 | 1HG | GLU | 16 | 10.499 | 1.068  | 5.807  | 1.00 | 1.00 | TAG H   |
| ATOM | 280 | 2HG | GLU | 16 | 9.055  | 1.737  | 5.037  | 1.00 | 1.00 | TAG H   |
| ATOM | 281 | H01 | GLU | 16 | 10.368 | 4.711  | 6.240  | 1.00 | 1.00 | TAG H   |
| ATOM | 282 | N   | LYS | 17 | 10.208 | -2.029 | 7.651  | 1.00 | 1.00 | TAG N   |
| ATOM | 283 | CA  | LYS | 17 | 11.520 | -2.627 | 7.874  | 1.00 | 1.00 | TAG C   |
| ATOM | 284 | C   | LYS | 17 | 11.584 | -3.982 | 7.200  | 1.00 | 1.00 | TAG C   |
| ATOM | 285 | O   | LYS | 17 | 12.519 | -4.263 | 6.442  | 1.00 | 1.00 | TAG O   |
| ATOM | 286 | CB  | LYS | 17 | 11.785 | -2.766 | 9.374  | 1.00 | 1.00 | TAG C   |
| ATOM | 287 | CG  | LYS | 17 | 13.146 | -3.321 | 9.734  | 1.00 | 1.00 | TAG C   |
| ATOM | 288 | CD  | LYS | 17 | 13.515 | -2.877 | 11.138 | 1.00 | 1.00 | TAG C   |
| ATOM | 289 | CE  | LYS | 17 | 14.857 | -3.424 | 11.584 | 1.00 | 1.00 | TAG C   |
| ATOM | 290 | NZ  | LYS | 17 | 14.728 | -4.837 | 11.995 | 1.00 | 1.00 | TAG N1+ |
| ATOM | 291 | H   | LYS | 17 | 9.569  | -2.183 | 8.405  | 1.00 | 1.00 | TAG H   |
| ATOM | 292 | HA  | LYS | 17 | 12.294 | -1.976 | 7.440  | 1.00 | 1.00 | TAG H   |
| ATOM | 293 | 1HB | LYS | 17 | 11.672 | -1.777 | 9.845  | 1.00 | 1.00 | TAG H   |
| ATOM | 294 | 2HB | LYS | 17 | 11.012 | -3.418 | 9.808  | 1.00 | 1.00 | TAG H   |
| ATOM | 295 | 1HG | LYS | 17 | 13.134 | -4.420 | 9.675  | 1.00 | 1.00 | TAG H   |
| ATOM | 296 | 2HG | LYS | 17 | 13.900 | -2.969 | 9.015  | 1.00 | 1.00 | TAG H   |
| ATOM | 297 | 1HD | LYS | 17 | 13.538 | -1.779 | 11.178 | 1.00 | 1.00 | TAG H   |
| ATOM | 298 | 2HD | LYS | 17 | 12.735 | -3.208 | 11.841 | 1.00 | 1.00 | TAG H   |
| ATOM | 299 | 1HE | LYS | 17 | 15.586 | -3.338 | 10.765 | 1.00 | 1.00 | TAG H   |
| ATOM | 300 | 2HE | LYS | 17 | 15.244 | -2.825 | 12.423 | 1.00 | 1.00 | TAG H   |
| ATOM | 301 | 1HZ | LYS | 17 | 15.372 | -5.030 | 12.736 | 1.00 | 1.00 | TAG H   |

|      |     |     |     |    |        |         |        |      |      |     |   |
|------|-----|-----|-----|----|--------|---------|--------|------|------|-----|---|
| ATOM | 302 | 2HZ | LYS | 17 | 13.795 | -5.008  | 12.312 | 1.00 | 1.00 | TAG | H |
| ATOM | 303 | 3HZ | LYS | 17 | 14.929 | -5.431  | 11.216 | 1.00 | 1.00 | TAG | H |
| ATOM | 304 | N   | HIS | 18 | 10.541 | -4.761  | 7.293  | 1.00 | 1.00 | TAG | N |
| ATOM | 305 | CA  | HIS | 18 | 10.519 | -6.183  | 6.878  | 1.00 | 1.00 | TAG | C |
| ATOM | 306 | C   | HIS | 18 | 9.336  | -6.425  | 5.968  | 1.00 | 1.00 | TAG | C |
| ATOM | 307 | O   | HIS | 18 | 9.264  | -7.482  | 5.292  | 1.00 | 1.00 | TAG | O |
| ATOM | 308 | CB  | HIS | 18 | 10.354 | -7.033  | 8.261  | 1.00 | 1.00 | TAG | C |
| ATOM | 309 | CG  | HIS | 18 | 10.208 | -8.473  | 7.822  | 1.00 | 1.00 | TAG | C |
| ATOM | 310 | CD2 | HIS | 18 | 9.069  | -9.248  | 7.989  | 1.00 | 1.00 | TAG | C |
| ATOM | 311 | ND1 | HIS | 18 | 11.114 | -9.316  | 7.298  | 1.00 | 1.00 | TAG | N |
| ATOM | 312 | CE1 | HIS | 18 | 10.645 | -10.518 | 7.087  | 1.00 | 1.00 | TAG | C |
| ATOM | 313 | NE2 | HIS | 18 | 9.362  | -10.463 | 7.447  | 1.00 | 1.00 | TAG | N |
| ATOM | 314 | H   | HIS | 18 | 9.666  | -4.445  | 7.659  | 1.00 | 1.00 | TAG | H |
| ATOM | 315 | HA  | HIS | 18 | 11.426 | -6.474  | 6.328  | 1.00 | 1.00 | TAG | H |
| ATOM | 316 | 1HB | HIS | 18 | 11.228 | -6.903  | 8.916  | 1.00 | 1.00 | TAG | H |
| ATOM | 317 | 2HB | HIS | 18 | 9.473  | -6.699  | 8.831  | 1.00 | 1.00 | TAG | H |
| ATOM | 318 | HD1 | HIS | 18 | 12.055 | -9.050  | 7.089  | 1.00 | 1.00 | TAG | H |
| ATOM | 319 | HD2 | HIS | 18 | 8.123  | -8.944  | 8.461  | 1.00 | 1.00 | TAG | H |
| ATOM | 320 | HE1 | HIS | 18 | 11.192 | -11.390 | 6.698  | 1.00 | 1.00 | TAG | H |
| ATOM | 321 | N   | HIS | 19 | 8.278  | -5.653  | 6.072  | 1.00 | 1.00 | TAG | N |
| ATOM | 322 | CA  | HIS | 19 | 7.056  | -5.872  | 5.313  | 1.00 | 1.00 | TAG | C |
| ATOM | 323 | C   | HIS | 19 | 7.183  | -5.651  | 3.805  | 1.00 | 1.00 | TAG | C |
| ATOM | 324 | O   | HIS | 19 | 7.091  | -6.499  | 2.908  | 1.00 | 1.00 | TAG | O |
| ATOM | 325 | CB  | HIS | 19 | 5.903  | -5.068  | 5.900  | 1.00 | 1.00 | TAG | C |
| ATOM | 326 | CG  | HIS | 19 | 5.289  | -5.705  | 7.104  | 1.00 | 1.00 | TAG | C |
| ATOM | 327 | CD2 | HIS | 19 | 5.674  | -5.392  | 8.390  | 1.00 | 1.00 | TAG | C |
| ATOM | 328 | ND1 | HIS | 19 | 4.340  | -6.668  | 7.223  | 1.00 | 1.00 | TAG | N |
| ATOM | 329 | CE1 | HIS | 19 | 4.170  | -6.915  | 8.560  | 1.00 | 1.00 | TAG | C |
| ATOM | 330 | NE2 | HIS | 19 | 4.987  | -6.134  | 9.250  | 1.00 | 1.00 | TAG | N |
| ATOM | 331 | H   | HIS | 19 | 8.238  | -4.859  | 6.679  | 1.00 | 1.00 | TAG | H |
| ATOM | 332 | HA  | HIS | 19 | 6.838  | -6.945  | 5.416  | 1.00 | 1.00 | TAG | H |
| ATOM | 333 | 1HB | HIS | 19 | 6.265  | -4.064  | 6.169  | 1.00 | 1.00 | TAG | H |
| ATOM | 334 | 2HB | HIS | 19 | 5.129  | -4.934  | 5.130  | 1.00 | 1.00 | TAG | H |
| ATOM | 335 | HD2 | HIS | 19 | 6.432  | -4.643  | 8.662  | 1.00 | 1.00 | TAG | H |
| ATOM | 336 | HE1 | HIS | 19 | 3.469  | -7.645  | 8.991  | 1.00 | 1.00 | TAG | H |
| ATOM | 337 | HE2 | HIS | 19 | 5.072  | -6.107  | 10.246 | 1.00 | 1.00 | TAG | H |
| ATOM | 338 | N   | SER | 20 | 7.433  | -4.306  | 3.487  | 1.00 | 1.00 | TAG | N |
| ATOM | 339 | CA  | SER | 20 | 7.375  | -3.833  | 2.103  | 1.00 | 1.00 | TAG | C |
| ATOM | 340 | C   | SER | 20 | 7.152  | -4.934  | 1.076  | 1.00 | 1.00 | TAG | C |
| ATOM | 341 | O   | SER | 20 | 6.363  | -4.912  | 0.145  | 1.00 | 1.00 | TAG | O |
| ATOM | 342 | CB  | SER | 20 | 8.676  | -3.102  | 1.759  | 1.00 | 1.00 | TAG | C |
| ATOM | 343 | OG  | SER | 20 | 8.707  | -2.765  | 0.384  | 1.00 | 1.00 | TAG | O |
| ATOM | 344 | H   | SER | 20 | 7.659  | -3.601  | 4.160  | 1.00 | 1.00 | TAG | H |
| ATOM | 345 | HA  | SER | 20 | 6.503  | -3.165  | 2.049  | 1.00 | 1.00 | TAG | H |
| ATOM | 346 | 1HB | SER | 20 | 8.763  | -2.191  | 2.369  | 1.00 | 1.00 | TAG | H |
| ATOM | 347 | 2HB | SER | 20 | 9.538  | -3.739  | 2.007  | 1.00 | 1.00 | TAG | H |
| ATOM | 348 | HG  | SER | 20 | 7.782  | -2.548  | 0.073  | 1.00 | 1.00 | TAG | H |
| ATOM | 349 | N   | HIS | 21 | 7.931  | -6.061  | 1.234  | 1.00 | 1.00 | TAG | N |
| ATOM | 350 | CA  | HIS | 21 | 7.945  | -7.144  | 0.262  | 1.00 | 1.00 | TAG | C |
| ATOM | 351 | C   | HIS | 21 | 6.658  | -7.970  | 0.198  | 1.00 | 1.00 | TAG | C |
| ATOM | 352 | O   | HIS | 21 | 6.001  | -8.269  | -0.805 | 1.00 | 1.00 | TAG | O |

|      |     |      |     |    |        |         |        |      |      |     |     |
|------|-----|------|-----|----|--------|---------|--------|------|------|-----|-----|
| ATOM | 353 | CB   | HIS | 21 | 9.169  | -8.030  | 0.457  | 1.00 | 1.00 | TAG | C   |
| ATOM | 354 | CG   | HIS | 21 | 10.413 | -7.459  | -0.140 | 1.00 | 1.00 | TAG | C   |
| ATOM | 355 | CD2  | HIS | 21 | 11.308 | -6.701  | 0.585  | 1.00 | 1.00 | TAG | C   |
| ATOM | 356 | ND1  | HIS | 21 | 10.902 | -7.501  | -1.406 | 1.00 | 1.00 | TAG | N   |
| ATOM | 357 | CE1  | HIS | 21 | 12.066 | -6.778  | -1.421 | 1.00 | 1.00 | TAG | C   |
| ATOM | 358 | NE2  | HIS | 21 | 12.295 | -6.301  | -0.206 | 1.00 | 1.00 | TAG | N   |
| ATOM | 359 | H    | HIS | 21 | 8.534  | -6.210  | 2.018  | 1.00 | 1.00 | TAG | H   |
| ATOM | 360 | HA   | HIS | 21 | 8.005  | -6.654  | -0.721 | 1.00 | 1.00 | TAG | H   |
| ATOM | 361 | 1HB  | HIS | 21 | 9.328  | -8.192  | 1.534  | 1.00 | 1.00 | TAG | H   |
| ATOM | 362 | 2HB  | HIS | 21 | 8.974  | -9.016  | 0.008  | 1.00 | 1.00 | TAG | H   |
| ATOM | 363 | HD1  | HIS | 21 | 10.488 | -7.973  | -2.185 | 1.00 | 1.00 | TAG | H   |
| ATOM | 364 | HD2  | HIS | 21 | 11.216 | -6.464  | 1.656  | 1.00 | 1.00 | TAG | H   |
| ATOM | 365 | HE1  | HIS | 21 | 12.708 | -6.619  | -2.301 | 1.00 | 1.00 | TAG | H   |
| ATOM | 366 | N    | ARG | 22 | 6.222  | -8.409  | 1.427  | 1.00 | 1.00 | TAG | N   |
| ATOM | 367 | CA   | ARG | 22 | 5.080  | -9.296  | 1.579  | 1.00 | 1.00 | TAG | C   |
| ATOM | 368 | C    | ARG | 22 | 3.914  | -8.424  | 1.118  | 1.00 | 1.00 | TAG | C   |
| ATOM | 369 | O    | ARG | 22 | 2.933  | -9.000  | 0.625  | 1.00 | 1.00 | TAG | O   |
| ATOM | 370 | CB   | ARG | 22 | 4.946  | -9.691  | 3.053  | 1.00 | 1.00 | TAG | C   |
| ATOM | 371 | CG   | ARG | 22 | 3.809  | -10.664 | 3.353  | 1.00 | 1.00 | TAG | C   |
| ATOM | 372 | CD   | ARG | 22 | 3.954  | -11.280 | 4.740  | 1.00 | 1.00 | TAG | C   |
| ATOM | 373 | NE   | ARG | 22 | 4.371  | -10.292 | 5.733  | 1.00 | 1.00 | TAG | N   |
| ATOM | 374 | CZ   | ARG | 22 | 5.366  | -10.474 | 6.601  | 1.00 | 1.00 | TAG | C   |
| ATOM | 375 | NH1  | ARG | 22 | 6.052  | -11.615 | 6.609  | 1.00 | 1.00 | TAG | N   |
| ATOM | 376 | NH2  | ARG | 22 | 5.689  | -9.502  | 7.451  | 1.00 | 1.00 | TAG | N1+ |
| ATOM | 377 | H    | ARG | 22 | 6.655  | -8.152  | 2.290  | 1.00 | 1.00 | TAG | H   |
| ATOM | 378 | HA   | ARG | 22 | 5.146  | -10.237 | 1.013  | 1.00 | 1.00 | TAG | H   |
| ATOM | 379 | 1HB  | ARG | 22 | 5.893  | -10.143 | 3.384  | 1.00 | 1.00 | TAG | H   |
| ATOM | 380 | 2HB  | ARG | 22 | 4.797  | -8.780  | 3.651  | 1.00 | 1.00 | TAG | H   |
| ATOM | 381 | 1HG  | ARG | 22 | 2.845  | -10.137 | 3.283  | 1.00 | 1.00 | TAG | H   |
| ATOM | 382 | 2HG  | ARG | 22 | 3.796  | -11.461 | 2.596  | 1.00 | 1.00 | TAG | H   |
| ATOM | 383 | 1HD  | ARG | 22 | 2.995  | -11.725 | 5.045  | 1.00 | 1.00 | TAG | H   |
| ATOM | 384 | 2HD  | ARG | 22 | 4.690  | -12.096 | 4.702  | 1.00 | 1.00 | TAG | H   |
| ATOM | 385 | HE   | ARG | 22 | 3.878  | -9.423  | 5.764  | 1.00 | 1.00 | TAG | H   |
| ATOM | 386 | 1HH1 | ARG | 22 | 5.823  | -12.341 | 5.962  | 1.00 | 1.00 | TAG | H   |
| ATOM | 387 | 2HH1 | ARG | 22 | 6.798  | -11.745 | 7.263  | 1.00 | 1.00 | TAG | H   |
| ATOM | 388 | H01  | ARG | 22 | 5.904  | -9.901  | 8.354  | 1.00 | 1.00 | TAG | H   |
| ATOM | 389 | H02  | ARG | 22 | 4.913  | -8.862  | 7.541  | 1.00 | 1.00 | TAG | H   |
| ATOM | 390 | H03  | ARG | 22 | 6.496  | -9.005  | 7.102  | 1.00 | 1.00 | TAG | H   |
| ATOM | 391 | N    | GLY | 23 | 3.870  | -7.222  | 1.192  | 1.00 | 1.00 | TAG | N   |
| ATOM | 392 | CA   | GLY | 23 | 2.829  | -6.326  | 0.699  | 1.00 | 1.00 | TAG | C   |
| ATOM | 393 | C    | GLY | 23 | 1.436  | -6.828  | 1.078  | 1.00 | 1.00 | TAG | C   |
| ATOM | 394 | O    | GLY | 23 | 0.612  | -7.105  | 0.204  | 1.00 | 1.00 | TAG | O   |
| ATOM | 395 | H    | GLY | 23 | 4.607  | -6.713  | 1.635  | 1.00 | 1.00 | TAG | H   |
| ATOM | 396 | 1HA  | GLY | 23 | 2.983  | -5.319  | 1.113  | 1.00 | 1.00 | TAG | H   |
| ATOM | 397 | 2HA  | GLY | 23 | 2.905  | -6.239  | -0.394 | 1.00 | 1.00 | TAG | H   |
| ATOM | 398 | N    | TYR | 24 | 1.157  | -6.942  | 2.344  | 1.00 | 0.00 | TAG | N   |
| ATOM | 399 | CA   | TYR | 24 | -0.141 | -7.293  | 2.913  | 1.00 | 0.00 | TAG | C   |
| ATOM | 400 | C    | TYR | 24 | -1.221 | -7.255  | 1.859  | 1.00 | 0.00 | TAG | C   |
| ATOM | 401 | O    | TYR | 24 | -1.407 | -6.296  | 1.117  | 1.00 | 0.00 | TAG | O   |
| ATOM | 402 | CB   | TYR | 24 | -0.538 | -6.299  | 4.044  | 1.00 | 0.00 | TAG | C   |
| ATOM | 403 | CG   | TYR | 24 | 0.312  | -6.333  | 5.319  | 1.00 | 0.00 | TAG | C   |

|      |     |     |     |    |        |        |       |      |      |     |   |
|------|-----|-----|-----|----|--------|--------|-------|------|------|-----|---|
| ATOM | 404 | CD1 | TYR | 24 | 1.146  | -7.423 | 5.592 | 1.00 | 0.00 | TAG | C |
| ATOM | 405 | CD2 | TYR | 24 | 0.263  | -5.262 | 6.216 | 1.00 | 0.00 | TAG | C |
| ATOM | 406 | CE1 | TYR | 24 | 1.924  | -7.435 | 6.746 | 1.00 | 0.00 | TAG | C |
| ATOM | 407 | CE2 | TYR | 24 | 1.042  | -5.276 | 7.369 | 1.00 | 0.00 | TAG | C |
| ATOM | 408 | CZ  | TYR | 24 | 1.872  | -6.363 | 7.633 | 1.00 | 0.00 | TAG | C |
| ATOM | 409 | OH  | TYR | 24 | 2.639  | -6.379 | 8.763 | 1.00 | 0.00 | TAG | O |
| ATOM | 410 | OXT | TYR | 24 | -2.087 | -8.395 | 1.705 | 0.00 | 0.00 | TAG | O |
| ATOM | 411 | H   | TYR | 24 | 1.937  | -6.766 | 3.017 | 1.00 | 0.00 | TAG | H |
| ATOM | 412 | HA  | TYR | 24 | -0.091 | -8.323 | 3.312 | 1.00 | 0.00 | TAG | H |
| ATOM | 413 | 2HB | TYR | 24 | -1.591 | -6.475 | 4.341 | 1.00 | 0.00 | TAG | H |
| ATOM | 414 | 3HB | TYR | 24 | -0.554 | -5.267 | 3.637 | 1.00 | 0.00 | TAG | H |
| ATOM | 415 | 1HD | TYR | 24 | 1.197  | -8.257 | 4.905 | 1.00 | 0.00 | TAG | H |
| ATOM | 416 | 2HD | TYR | 24 | -0.371 | -4.410 | 6.011 | 1.00 | 0.00 | TAG | H |
| ATOM | 417 | 1HE | TYR | 24 | 2.573  | -8.273 | 6.955 | 1.00 | 0.00 | TAG | H |
| ATOM | 418 | 2HE | TYR | 24 | 0.999  | -4.440 | 8.050 | 1.00 | 0.00 | TAG | H |
| ATOM | 419 | HH  | TYR | 24 | 2.479  | -5.567 | 9.250 | 1.00 | 0.00 | TAG | H |
| ATOM | 420 | H01 | TYR | 24 | -2.289 | -8.763 | 2.569 | 0.00 | 0.00 | TAG | H |
| END  |     |     |     |    |        |        |       |      |      |     |   |

#### Histatin conformer 5:

|      |    |     |     |   |        |        |        |      |      |     |     |
|------|----|-----|-----|---|--------|--------|--------|------|------|-----|-----|
| ATOM | 1  | N   | ASP | 1 | -0.753 | -1.254 | -0.000 | 1.00 | 1.00 | TAG | N1+ |
| ATOM | 2  | CA  | ASP | 1 | 0.000  | 0.000  | 0.000  | 1.00 | 1.00 | TAG | C   |
| ATOM | 3  | C   | ASP | 1 | -0.977 | 1.169  | -0.000 | 1.00 | 1.00 | TAG | C   |
| ATOM | 4  | O   | ASP | 1 | -1.016 | 1.960  | 0.954  | 1.00 | 1.00 | TAG | O   |
| ATOM | 5  | CB  | ASP | 1 | 0.960  | 0.096  | -1.192 | 1.00 | 1.00 | TAG | C   |
| ATOM | 6  | CG  | ASP | 1 | 1.888  | 1.333  | -1.129 | 1.00 | 1.00 | TAG | C   |
| ATOM | 7  | OD1 | ASP | 1 | 2.076  | 1.945  | -0.042 | 1.00 | 1.00 | TAG | O   |
| ATOM | 8  | OD2 | ASP | 1 | 2.445  | 1.694  | -2.194 | 1.00 | 1.00 | TAG | O   |
| ATOM | 9  | 1H  | ASP | 1 | -0.117 | -2.025 | -0.000 | 1.00 | 1.00 | TAG | H   |
| ATOM | 10 | 2H  | ASP | 1 | -1.329 | -1.298 | 0.816  | 1.00 | 1.00 | TAG | H   |
| ATOM | 11 | 3H  | ASP | 1 | -1.329 | -1.298 | -0.816 | 1.00 | 1.00 | TAG | H   |
| ATOM | 12 | HA  | ASP | 1 | 0.619  | 0.032  | 0.908  | 1.00 | 1.00 | TAG | H   |
| ATOM | 13 | 1HB | ASP | 1 | 1.576  | -0.815 | -1.233 | 1.00 | 1.00 | TAG | H   |
| ATOM | 14 | 2HB | ASP | 1 | 0.376  | 0.131  | -2.123 | 1.00 | 1.00 | TAG | H   |
| ATOM | 15 | H01 | ASP | 1 | 2.490  | 2.653  | -2.223 | 1.00 | 1.00 | TAG | H   |
| ATOM | 16 | N   | SER | 2 | -1.762 | 1.319  | -1.010 | 1.00 | 1.00 | TAG | N   |
| ATOM | 17 | CA  | SER | 2 | -2.774 | 2.372  | -1.101 | 1.00 | 1.00 | TAG | C   |
| ATOM | 18 | C   | SER | 2 | -4.177 | 1.865  | -1.398 | 1.00 | 1.00 | TAG | C   |
| ATOM | 19 | O   | SER | 2 | -5.207 | 2.155  | -0.808 | 1.00 | 1.00 | TAG | O   |
| ATOM | 20 | CB  | SER | 2 | -2.375 | 3.371  | -2.190 | 1.00 | 1.00 | TAG | C   |
| ATOM | 21 | OG  | SER | 2 | -3.408 | 4.315  | -2.400 | 1.00 | 1.00 | TAG | O   |
| ATOM | 22 | H   | SER | 2 | -1.736 | 0.721  | -1.812 | 1.00 | 1.00 | TAG | H   |
| ATOM | 23 | HA  | SER | 2 | -2.809 | 2.842  | -0.108 | 1.00 | 1.00 | TAG | H   |
| ATOM | 24 | 1HB | SER | 2 | -1.450 | 3.890  | -1.900 | 1.00 | 1.00 | TAG | H   |
| ATOM | 25 | 2HB | SER | 2 | -2.163 | 2.836  | -3.127 | 1.00 | 1.00 | TAG | H   |
| ATOM | 26 | HG  | SER | 2 | -3.131 | 4.961  | -3.113 | 1.00 | 1.00 | TAG | H   |
| ATOM | 27 | N   | HIS | 3 | -4.246 | 0.984  | -2.485 | 1.00 | 0.00 | TAG | N   |
| ATOM | 28 | CA  | HIS | 3 | -5.465 | 0.260  | -2.834 | 1.00 | 0.00 | TAG | C   |

|      |    |     |     |   |         |        |        |      |      |     |   |
|------|----|-----|-----|---|---------|--------|--------|------|------|-----|---|
| ATOM | 29 | C   | HIS | 3 | -5.501  | -1.094 | -2.167 | 1.00 | 0.00 | TAG | C |
| ATOM | 30 | O   | HIS | 3 | -6.551  | -1.559 | -1.660 | 1.00 | 0.00 | TAG | O |
| ATOM | 31 | CB  | HIS | 3 | -5.452  | 0.104  | -4.364 | 1.00 | 0.00 | TAG | C |
| ATOM | 32 | CG  | HIS | 3 | -5.491  | 1.427  | -5.072 | 1.00 | 0.00 | TAG | C |
| ATOM | 33 | CD2 | HIS | 3 | -4.386  | 1.964  | -5.718 | 1.00 | 0.00 | TAG | C |
| ATOM | 34 | ND1 | HIS | 3 | -6.598  | 2.266  | -5.174 | 1.00 | 0.00 | TAG | N |
| ATOM | 35 | CE1 | HIS | 3 | -6.060  | 3.272  | -5.889 | 1.00 | 0.00 | TAG | C |
| ATOM | 36 | NE2 | HIS | 3 | -4.754  | 3.171  | -6.255 | 1.00 | 0.00 | TAG | N |
| ATOM | 37 | H   | HIS | 3 | -3.429  | 0.846  | -3.044 | 1.00 | 0.00 | TAG | H |
| ATOM | 38 | HA  | HIS | 3 | -6.319  | 0.831  | -2.434 | 1.00 | 0.00 | TAG | H |
| ATOM | 39 | 2HB | HIS | 3 | -6.318  | -0.494 | -4.713 | 1.00 | 0.00 | TAG | H |
| ATOM | 40 | 3HB | HIS | 3 | -4.555  | -0.442 | -4.721 | 1.00 | 0.00 | TAG | H |
| ATOM | 41 | 2HD | HIS | 3 | -3.412  | 1.486  | -5.772 | 1.00 | 0.00 | TAG | H |
| ATOM | 42 | 1HE | HIS | 3 | -6.700  | 4.108  | -6.136 | 1.00 | 0.00 | TAG | H |
| ATOM | 43 | 2HE | HIS | 3 | -4.178  | 3.831  | -6.797 | 1.00 | 0.00 | TAG | H |
| ATOM | 44 | N   | ALA | 4 | -4.356  | -1.773 | -2.106 | 1.00 | 1.00 | TAG | N |
| ATOM | 45 | CA  | ALA | 4 | -4.234  | -3.067 | -1.464 | 1.00 | 1.00 | TAG | C |
| ATOM | 46 | C   | ALA | 4 | -5.188  | -3.144 | -0.259 | 1.00 | 1.00 | TAG | C |
| ATOM | 47 | O   | ALA | 4 | -5.949  | -4.101 | -0.145 | 1.00 | 1.00 | TAG | O |
| ATOM | 48 | CB  | ALA | 4 | -2.791  | -3.274 | -1.006 | 1.00 | 1.00 | TAG | C |
| ATOM | 49 | H   | ALA | 4 | -3.505  | -1.443 | -2.515 | 1.00 | 1.00 | TAG | H |
| ATOM | 50 | HA  | ALA | 4 | -4.501  | -3.859 | -2.179 | 1.00 | 1.00 | TAG | H |
| ATOM | 51 | 1HB | ALA | 4 | -2.698  | -4.256 | -0.518 | 1.00 | 1.00 | TAG | H |
| ATOM | 52 | 2HB | ALA | 4 | -2.120  | -3.232 | -1.876 | 1.00 | 1.00 | TAG | H |
| ATOM | 53 | 3HB | ALA | 4 | -2.515  | -2.483 | -0.293 | 1.00 | 1.00 | TAG | H |
| ATOM | 54 | N   | LYS | 5 | -5.168  | -2.196 | 0.616  | 1.00 | 0.00 | TAG | N |
| ATOM | 55 | CA  | LYS | 5 | -6.038  | -2.204 | 1.789  | 1.00 | 0.00 | TAG | C |
| ATOM | 56 | C   | LYS | 5 | -7.492  | -2.149 | 1.385  | 1.00 | 0.00 | TAG | C |
| ATOM | 57 | O   | LYS | 5 | -8.318  | -2.812 | 1.979  | 1.00 | 0.00 | TAG | O |
| ATOM | 58 | CB  | LYS | 5 | -5.672  | -1.009 | 2.711  | 1.00 | 0.00 | TAG | C |
| ATOM | 59 | CG  | LYS | 5 | -4.318  | -1.186 | 3.442  | 1.00 | 0.00 | TAG | C |
| ATOM | 60 | CD  | LYS | 5 | -3.987  | -0.090 | 4.460  | 1.00 | 0.00 | TAG | C |
| ATOM | 61 | CE  | LYS | 5 | -3.604  | 1.194  | 3.713  | 1.00 | 0.00 | TAG | C |
| ATOM | 62 | NZ  | LYS | 5 | -3.199  | 2.224  | 4.686  | 1.00 | 0.00 | TAG | N |
| ATOM | 63 | H   | LYS | 5 | -4.539  | -1.434 | 0.487  | 1.00 | 0.00 | TAG | H |
| ATOM | 64 | HA  | LYS | 5 | -5.880  | -3.153 | 2.335  | 1.00 | 0.00 | TAG | H |
| ATOM | 65 | 2HB | LYS | 5 | -6.483  | -0.848 | 3.452  | 1.00 | 0.00 | TAG | H |
| ATOM | 66 | 3HB | LYS | 5 | -5.643  | -0.074 | 2.116  | 1.00 | 0.00 | TAG | H |
| ATOM | 67 | 2HG | LYS | 5 | -3.502  | -1.269 | 2.698  | 1.00 | 0.00 | TAG | H |
| ATOM | 68 | 3HG | LYS | 5 | -4.307  | -2.141 | 3.999  | 1.00 | 0.00 | TAG | H |
| ATOM | 69 | 2HD | LYS | 5 | -3.149  | -0.420 | 5.108  | 1.00 | 0.00 | TAG | H |
| ATOM | 70 | 3HD | LYS | 5 | -4.853  | 0.074  | 5.129  | 1.00 | 0.00 | TAG | H |
| ATOM | 71 | 2HE | LYS | 5 | -4.452  | 1.572  | 3.104  | 1.00 | 0.00 | TAG | H |
| ATOM | 72 | 3HE | LYS | 5 | -2.781  | 0.995  | 2.994  | 1.00 | 0.00 | TAG | H |
| ATOM | 73 | H01 | LYS | 5 | -2.984  | 1.786  | 5.570  | 1.00 | 0.00 | TAG | H |
| ATOM | 74 | H02 | LYS | 5 | -3.953  | 2.885  | 4.811  | 1.00 | 0.00 | TAG | H |
| ATOM | 75 | N   | ARG | 6 | -7.809  | -1.368 | 0.375  | 1.00 | 1.00 | TAG | N |
| ATOM | 76 | CA  | ARG | 6 | -9.183  | -1.244 | -0.148 | 1.00 | 1.00 | TAG | C |
| ATOM | 77 | C   | ARG | 6 | -9.589  | -2.514 | -0.879 | 1.00 | 1.00 | TAG | C |
| ATOM | 78 | O   | ARG | 6 | -10.676 | -3.063 | -0.643 | 1.00 | 1.00 | TAG | O |
| ATOM | 79 | CB  | ARG | 6 | -9.354  | -0.036 | -1.078 | 1.00 | 1.00 | TAG | C |

|      |     |      |     |   |         |        |        |      |      |     |     |
|------|-----|------|-----|---|---------|--------|--------|------|------|-----|-----|
| ATOM | 80  | CG   | ARG | 6 | -9.218  | 1.297  | -0.399 | 1.00 | 1.00 | TAG | C   |
| ATOM | 81  | CD   | ARG | 6 | -10.329 | 1.537  | 0.594  | 1.00 | 1.00 | TAG | C   |
| ATOM | 82  | NE   | ARG | 6 | -9.913  | 2.514  | 1.596  | 1.00 | 1.00 | TAG | N   |
| ATOM | 83  | CZ   | ARG | 6 | -10.726 | 3.383  | 2.186  | 1.00 | 1.00 | TAG | C   |
| ATOM | 84  | NH1  | ARG | 6 | -12.011 | 3.456  | 1.831  | 1.00 | 1.00 | TAG | N   |
| ATOM | 85  | NH2  | ARG | 6 | -10.234 | 4.227  | 3.090  | 1.00 | 1.00 | TAG | N1+ |
| ATOM | 86  | H    | ARG | 6 | -7.143  | -0.805 | -0.114 | 1.00 | 1.00 | TAG | H   |
| ATOM | 87  | HA   | ARG | 6 | -9.838  | -1.088 | 0.722  | 1.00 | 1.00 | TAG | H   |
| ATOM | 88  | 1HB  | ARG | 6 | -8.608  | -0.101 | -1.884 | 1.00 | 1.00 | TAG | H   |
| ATOM | 89  | 2HB  | ARG | 6 | -10.346 | -0.092 | -1.552 | 1.00 | 1.00 | TAG | H   |
| ATOM | 90  | 1HG  | ARG | 6 | -8.248  | 1.348  | 0.116  | 1.00 | 1.00 | TAG | H   |
| ATOM | 91  | 2HG  | ARG | 6 | -9.224  | 2.096  | -1.156 | 1.00 | 1.00 | TAG | H   |
| ATOM | 92  | 1HD  | ARG | 6 | -11.227 | 1.898  | 0.072  | 1.00 | 1.00 | TAG | H   |
| ATOM | 93  | 2HD  | ARG | 6 | -10.601 | 0.591  | 1.086  | 1.00 | 1.00 | TAG | H   |
| ATOM | 94  | HE   | ARG | 6 | -8.948  | 2.530  | 1.856  | 1.00 | 1.00 | TAG | H   |
| ATOM | 95  | 1HH1 | ARG | 6 | -12.367 | 2.854  | 1.116  | 1.00 | 1.00 | TAG | H   |
| ATOM | 96  | 2HH1 | ARG | 6 | -12.616 | 4.113  | 2.280  | 1.00 | 1.00 | TAG | H   |
| ATOM | 97  | H01  | ARG | 6 | -10.012 | 3.723  | 3.937  | 1.00 | 1.00 | TAG | H   |
| ATOM | 98  | H02  | ARG | 6 | -10.919 | 4.941  | 3.292  | 1.00 | 1.00 | TAG | H   |
| ATOM | 99  | H03  | ARG | 6 | -9.396  | 4.658  | 2.726  | 1.00 | 1.00 | TAG | H   |
| ATOM | 100 | N    | HIS | 7 | -8.752  | -3.020 | -1.773 | 1.00 | 1.00 | TAG | N   |
| ATOM | 101 | CA   | HIS | 7 | -9.107  | -4.107 | -2.674 | 1.00 | 1.00 | TAG | C   |
| ATOM | 102 | C    | HIS | 7 | -8.403  | -5.435 | -2.390 | 1.00 | 1.00 | TAG | C   |
| ATOM | 103 | O    | HIS | 7 | -8.922  | -6.522 | -2.685 | 1.00 | 1.00 | TAG | O   |
| ATOM | 104 | CB   | HIS | 7 | -8.934  | -3.684 | -4.127 | 1.00 | 1.00 | TAG | C   |
| ATOM | 105 | CG   | HIS | 7 | -10.073 | -2.864 | -4.642 | 1.00 | 1.00 | TAG | C   |
| ATOM | 106 | CD2  | HIS | 7 | -10.066 | -1.486 | -4.629 | 1.00 | 1.00 | TAG | C   |
| ATOM | 107 | ND1  | HIS | 7 | -11.275 | -3.227 | -5.159 | 1.00 | 1.00 | TAG | N   |
| ATOM | 108 | CE1  | HIS | 7 | -11.963 | -2.075 | -5.442 | 1.00 | 1.00 | TAG | C   |
| ATOM | 109 | NE2  | HIS | 7 | -11.215 | -1.034 | -5.114 | 1.00 | 1.00 | TAG | N   |
| ATOM | 110 | H    | HIS | 7 | -7.816  | -2.690 | -1.892 | 1.00 | 1.00 | TAG | H   |
| ATOM | 111 | HA   | HIS | 7 | -10.170 | -4.310 | -2.479 | 1.00 | 1.00 | TAG | H   |
| ATOM | 112 | 1HB  | HIS | 7 | -8.002  | -3.108 | -4.226 | 1.00 | 1.00 | TAG | H   |
| ATOM | 113 | 2HB  | HIS | 7 | -8.825  | -4.582 | -4.753 | 1.00 | 1.00 | TAG | H   |
| ATOM | 114 | HD1  | HIS | 7 | -11.599 | -4.161 | -5.307 | 1.00 | 1.00 | TAG | H   |
| ATOM | 115 | HD2  | HIS | 7 | -9.236  | -0.858 | -4.272 | 1.00 | 1.00 | TAG | H   |
| ATOM | 116 | HE1  | HIS | 7 | -12.974 | -2.024 | -5.871 | 1.00 | 1.00 | TAG | H   |
| ATOM | 117 | N    | HIS | 8 | -7.198  | -5.367 | -1.805 | 1.00 | 1.00 | TAG | N   |
| ATOM | 118 | CA   | HIS | 8 | -6.371  | -6.549 | -1.607 | 1.00 | 1.00 | TAG | C   |
| ATOM | 119 | C    | HIS | 8 | -6.299  | -7.052 | -0.165 | 1.00 | 1.00 | TAG | C   |
| ATOM | 120 | O    | HIS | 8 | -5.475  | -7.918 | 0.156  | 1.00 | 1.00 | TAG | O   |
| ATOM | 121 | CB   | HIS | 8 | -4.981  | -6.342 | -2.196 | 1.00 | 1.00 | TAG | C   |
| ATOM | 122 | CG   | HIS | 8 | -4.932  | -6.536 | -3.677 | 1.00 | 1.00 | TAG | C   |
| ATOM | 123 | CD2  | HIS | 8 | -4.805  | -7.658 | -4.430 | 1.00 | 1.00 | TAG | C   |
| ATOM | 124 | ND1  | HIS | 8 | -5.059  | -5.494 | -4.570 | 1.00 | 1.00 | TAG | N   |
| ATOM | 125 | CE1  | HIS | 8 | -5.013  | -5.964 | -5.810 | 1.00 | 1.00 | TAG | C   |
| ATOM | 126 | NE2  | HIS | 8 | -4.858  | -7.279 | -5.746 | 1.00 | 1.00 | TAG | N   |
| ATOM | 127 | H    | HIS | 8 | -6.789  | -4.517 | -1.470 | 1.00 | 1.00 | TAG | H   |
| ATOM | 128 | HA   | HIS | 8 | -6.880  | -7.355 | -2.155 | 1.00 | 1.00 | TAG | H   |
| ATOM | 129 | 1HB  | HIS | 8 | -4.635  | -5.326 | -1.955 | 1.00 | 1.00 | TAG | H   |
| ATOM | 130 | 2HB  | HIS | 8 | -4.281  | -7.042 | -1.718 | 1.00 | 1.00 | TAG | H   |

|      |     |     |     |    |        |        |        |      |      |     |   |
|------|-----|-----|-----|----|--------|--------|--------|------|------|-----|---|
| ATOM | 131 | HD2 | HIS | 8  | -4.683 | -8.685 | -4.053 | 1.00 | 1.00 | TAG | H |
| ATOM | 132 | HE1 | HIS | 8  | -5.090 | -5.367 | -6.730 | 1.00 | 1.00 | TAG | H |
| ATOM | 133 | HE2 | HIS | 8  | -4.789 | -7.895 | -6.530 | 1.00 | 1.00 | TAG | H |
| ATOM | 134 | N   | GLY | 9  | -7.324 | -6.562 | 0.627  | 1.00 | 1.00 | TAG | N |
| ATOM | 135 | CA  | GLY | 9  | -7.444 | -6.878 | 2.062  | 1.00 | 1.00 | TAG | C |
| ATOM | 136 | C   | GLY | 9  | -6.174 | -6.609 | 2.879  | 1.00 | 1.00 | TAG | C |
| ATOM | 137 | O   | GLY | 9  | -5.974 | -7.173 | 3.958  | 1.00 | 1.00 | TAG | O |
| ATOM | 138 | H   | GLY | 9  | -8.047 | -5.963 | 0.282  | 1.00 | 1.00 | TAG | H |
| ATOM | 139 | 1HA | GLY | 9  | -8.270 | -6.288 | 2.486  | 1.00 | 1.00 | TAG | H |
| ATOM | 140 | 2HA | GLY | 9  | -7.717 | -7.938 | 2.170  | 1.00 | 1.00 | TAG | H |
| ATOM | 141 | N   | TYR | 10 | -5.328 | -5.766 | 2.329  | 1.00 | 0.00 | TAG | N |
| ATOM | 142 | CA  | TYR | 10 | -4.009 | -5.542 | 2.914  | 1.00 | 0.00 | TAG | C |
| ATOM | 143 | C   | TYR | 10 | -4.050 | -4.422 | 3.925  | 1.00 | 0.00 | TAG | C |
| ATOM | 144 | O   | TYR | 10 | -3.111 | -3.667 | 4.057  | 1.00 | 0.00 | TAG | O |
| ATOM | 145 | CB  | TYR | 10 | -2.973 | -5.161 | 1.816  | 1.00 | 0.00 | TAG | C |
| ATOM | 146 | CG  | TYR | 10 | -2.644 | -6.238 | 0.776  | 1.00 | 0.00 | TAG | C |
| ATOM | 147 | CD1 | TYR | 10 | -2.994 | -7.573 | 0.998  | 1.00 | 0.00 | TAG | C |
| ATOM | 148 | CD2 | TYR | 10 | -1.997 | -5.883 | -0.411 | 1.00 | 0.00 | TAG | C |
| ATOM | 149 | CE1 | TYR | 10 | -2.704 | -8.540 | 0.039  | 1.00 | 0.00 | TAG | C |
| ATOM | 150 | CE2 | TYR | 10 | -1.707 | -6.850 | -1.368 | 1.00 | 0.00 | TAG | C |
| ATOM | 151 | CZ  | TYR | 10 | -2.061 | -8.179 | -1.143 | 1.00 | 0.00 | TAG | C |
| ATOM | 152 | OH  | TYR | 10 | -1.781 | -9.130 | -2.082 | 1.00 | 0.00 | TAG | O |
| ATOM | 153 | H   | TYR | 10 | -5.590 | -5.275 | 1.504  | 1.00 | 0.00 | TAG | H |
| ATOM | 154 | HA  | TYR | 10 | -3.688 | -6.462 | 3.437  | 1.00 | 0.00 | TAG | H |
| ATOM | 155 | 2HB | TYR | 10 | -2.020 | -4.857 | 2.294  | 1.00 | 0.00 | TAG | H |
| ATOM | 156 | 3HB | TYR | 10 | -3.307 | -4.237 | 1.300  | 1.00 | 0.00 | TAG | H |
| ATOM | 157 | 1HD | TYR | 10 | -3.499 | -7.862 | 1.909  | 1.00 | 0.00 | TAG | H |
| ATOM | 158 | 2HD | TYR | 10 | -1.729 | -4.851 | -0.598 | 1.00 | 0.00 | TAG | H |
| ATOM | 159 | 1HE | TYR | 10 | -2.979 | -9.571 | 0.205  | 1.00 | 0.00 | TAG | H |
| ATOM | 160 | 2HE | TYR | 10 | -1.213 | -6.562 | -2.284 | 1.00 | 0.00 | TAG | H |
| ATOM | 161 | HH  | TYR | 10 | -1.343 | -8.705 | -2.823 | 1.00 | 0.00 | TAG | H |
| ATOM | 162 | N   | LYS | 11 | -5.036 | -4.223 | 4.636  | 1.00 | 1.00 | TAG | N |
| ATOM | 163 | CA  | LYS | 11 | -5.153 | -3.155 | 5.622  | 1.00 | 1.00 | TAG | C |
| ATOM | 164 | C   | LYS | 11 | -3.960 | -3.193 | 6.558  | 1.00 | 1.00 | TAG | C |
| ATOM | 165 | O   | LYS | 11 | -3.654 | -2.167 | 7.183  | 1.00 | 1.00 | TAG | O |
| ATOM | 166 | CB  | LYS | 11 | -6.454 | -3.311 | 6.412  | 1.00 | 1.00 | TAG | C |
| ATOM | 167 | CG  | LYS | 11 | -6.718 | -2.222 | 7.430  | 1.00 | 1.00 | TAG | C |
| ATOM | 168 | CD  | LYS | 11 | -8.209 | -2.138 | 7.703  | 1.00 | 1.00 | TAG | C |
| ATOM | 169 | CE  | LYS | 11 | -8.550 | -1.088 | 8.742  | 1.00 | 1.00 | TAG | C |
| ATOM | 170 | NZ  | LYS | 11 | -8.263 | -1.596 | 10.100 | 1.00 | 1.00 | TAG | N |
| ATOM | 171 | H   | LYS | 11 | -5.854 | -4.797 | 4.595  | 1.00 | 1.00 | TAG | H |
| ATOM | 172 | HA  | LYS | 11 | -5.170 | -2.184 | 5.106  | 1.00 | 1.00 | TAG | H |
| ATOM | 173 | 1HB | LYS | 11 | -7.294 | -3.341 | 5.702  | 1.00 | 1.00 | TAG | H |
| ATOM | 174 | 2HB | LYS | 11 | -6.435 | -4.281 | 6.930  | 1.00 | 1.00 | TAG | H |
| ATOM | 175 | 1HG | LYS | 11 | -6.174 | -2.435 | 8.362  | 1.00 | 1.00 | TAG | H |
| ATOM | 176 | 2HG | LYS | 11 | -6.347 | -1.256 | 7.056  | 1.00 | 1.00 | TAG | H |
| ATOM | 177 | 1HD | LYS | 11 | -8.738 | -1.908 | 6.766  | 1.00 | 1.00 | TAG | H |
| ATOM | 178 | 2HD | LYS | 11 | -8.571 | -3.119 | 8.045  | 1.00 | 1.00 | TAG | H |
| ATOM | 179 | 1HE | LYS | 11 | -7.967 | -0.174 | 8.554  | 1.00 | 1.00 | TAG | H |
| ATOM | 180 | 2HE | LYS | 11 | -9.612 | -0.813 | 8.661  | 1.00 | 1.00 | TAG | H |
| ATOM | 181 | H01 | LYS | 11 | -7.978 | -2.563 | 10.045 | 1.00 | 1.00 | TAG | H |

|      |     |      |     |    |        |         |        |      |      |     |     |
|------|-----|------|-----|----|--------|---------|--------|------|------|-----|-----|
| ATOM | 182 | H02  | LYS | 11 | -9.093 | -1.521  | 10.671 | 1.00 | 1.00 | TAG | H   |
| ATOM | 183 | N    | ARG | 12 | -3.338 | -4.258  | 6.731  | 1.00 | 0.00 | TAG | N   |
| ATOM | 184 | CA   | ARG | 12 | -2.061 | -4.287  | 7.438  | 1.00 | 0.00 | TAG | C   |
| ATOM | 185 | C    | ARG | 12 | -1.173 | -3.148  | 6.997  | 1.00 | 0.00 | TAG | C   |
| ATOM | 186 | O    | ARG | 12 | -0.401 | -2.642  | 7.909  | 1.00 | 0.00 | TAG | O   |
| ATOM | 187 | CB   | ARG | 12 | -1.382 | -5.664  | 7.189  | 1.00 | 0.00 | TAG | C   |
| ATOM | 188 | CG   | ARG | 12 | -2.076 | -6.883  | 7.858  | 1.00 | 0.00 | TAG | C   |
| ATOM | 189 | CD   | ARG | 12 | -1.270 | -8.180  | 7.676  | 1.00 | 0.00 | TAG | C   |
| ATOM | 190 | NE   | ARG | 12 | -2.010 | -9.322  | 8.288  | 1.00 | 0.00 | TAG | N   |
| ATOM | 191 | CZ   | ARG | 12 | -2.830 | -10.143 | 7.640  | 1.00 | 0.00 | TAG | C   |
| ATOM | 192 | NH1  | ARG | 12 | -3.086 | -10.049 | 6.365  | 1.00 | 0.00 | TAG | N   |
| ATOM | 193 | NH2  | ARG | 12 | -3.410 | -11.089 | 8.309  | 1.00 | 0.00 | TAG | N1+ |
| ATOM | 194 | H    | ARG | 12 | -3.706 | -5.075  | 6.393  | 1.00 | 0.00 | TAG | H   |
| ATOM | 195 | HA   | ARG | 12 | -2.265 | -4.155  | 8.518  | 1.00 | 0.00 | TAG | H   |
| ATOM | 196 | 2HB  | ARG | 12 | -0.323 | -5.603  | 7.515  | 1.00 | 0.00 | TAG | H   |
| ATOM | 197 | 3HB  | ARG | 12 | -1.322 | -5.847  | 6.097  | 1.00 | 0.00 | TAG | H   |
| ATOM | 198 | 2HG  | ARG | 12 | -3.096 | -6.998  | 7.437  | 1.00 | 0.00 | TAG | H   |
| ATOM | 199 | 3HG  | ARG | 12 | -2.221 | -6.692  | 8.941  | 1.00 | 0.00 | TAG | H   |
| ATOM | 200 | 2HD  | ARG | 12 | -0.268 | -8.059  | 8.144  | 1.00 | 0.00 | TAG | H   |
| ATOM | 201 | 3HD  | ARG | 12 | -1.091 | -8.356  | 6.593  | 1.00 | 0.00 | TAG | H   |
| ATOM | 202 | HE   | ARG | 12 | -1.918 | -9.535  | 9.287  | 1.00 | 0.00 | TAG | H   |
| ATOM | 203 | 1HH1 | ARG | 12 | -2.596 | -9.283  | 5.896  | 1.00 | 0.00 | TAG | H   |
| ATOM | 204 | 2HH1 | ARG | 12 | -3.729 | -10.719 | 5.940  | 1.00 | 0.00 | TAG | H   |
| ATOM | 205 | H01  | ARG | 12 | -3.502 | -10.811 | 9.276  | 1.00 | 0.00 | TAG | H   |
| ATOM | 206 | H02  | ARG | 12 | -2.855 | -11.931 | 8.252  | 1.00 | 0.00 | TAG | H   |
| ATOM | 207 | H03  | ARG | 12 | -4.326 | -11.263 | 7.920  | 1.00 | 0.00 | TAG | H   |
| ATOM | 208 | N    | LYS | 13 | -1.088 | -2.779  | 5.854  | 1.00 | 0.00 | TAG | N   |
| ATOM | 209 | CA   | LYS | 13 | -0.076 | -1.842  | 5.376  | 1.00 | 0.00 | TAG | C   |
| ATOM | 210 | C    | LYS | 13 | 0.122  | -0.712  | 6.358  | 1.00 | 0.00 | TAG | C   |
| ATOM | 211 | O    | LYS | 13 | 1.254  | -0.250  | 6.545  | 1.00 | 0.00 | TAG | O   |
| ATOM | 212 | CB   | LYS | 13 | -0.492 | -1.299  | 3.982  | 1.00 | 0.00 | TAG | C   |
| ATOM | 213 | CG   | LYS | 13 | 0.562  | -0.358  | 3.347  | 1.00 | 0.00 | TAG | C   |
| ATOM | 214 | CD   | LYS | 13 | 1.850  | -1.049  | 2.891  | 1.00 | 0.00 | TAG | C   |
| ATOM | 215 | CE   | LYS | 13 | 2.733  | -0.035  | 2.152  | 1.00 | 0.00 | TAG | C   |
| ATOM | 216 | NZ   | LYS | 13 | 3.980  | -0.692  | 1.722  | 1.00 | 0.00 | TAG | N   |
| ATOM | 217 | H    | LYS | 13 | -1.746 | -3.135  | 5.197  | 1.00 | 0.00 | TAG | H   |
| ATOM | 218 | HA   | LYS | 13 | 0.886  | -2.380  | 5.290  | 1.00 | 0.00 | TAG | H   |
| ATOM | 219 | 2HB  | LYS | 13 | -1.467 | -0.774  | 4.062  | 1.00 | 0.00 | TAG | H   |
| ATOM | 220 | 3HB  | LYS | 13 | -0.683 | -2.147  | 3.293  | 1.00 | 0.00 | TAG | H   |
| ATOM | 221 | 2HG  | LYS | 13 | 0.802  | 0.461   | 4.053  | 1.00 | 0.00 | TAG | H   |
| ATOM | 222 | 3HG  | LYS | 13 | 0.141  | 0.138   | 2.452  | 1.00 | 0.00 | TAG | H   |
| ATOM | 223 | 2HD  | LYS | 13 | 1.605  | -1.900  | 2.224  | 1.00 | 0.00 | TAG | H   |
| ATOM | 224 | 3HD  | LYS | 13 | 2.374  | -1.480  | 3.766  | 1.00 | 0.00 | TAG | H   |
| ATOM | 225 | 2HE  | LYS | 13 | 2.976  | 0.833   | 2.800  | 1.00 | 0.00 | TAG | H   |
| ATOM | 226 | 3HE  | LYS | 13 | 2.194  | 0.384   | 1.276  | 1.00 | 0.00 | TAG | H   |
| ATOM | 227 | H01  | LYS | 13 | 4.237  | -0.360  | 0.803  | 1.00 | 0.00 | TAG | H   |
| ATOM | 228 | H02  | LYS | 13 | 3.841  | -1.692  | 1.692  | 1.00 | 0.00 | TAG | H   |
| ATOM | 229 | N    | PHE | 14 | -0.878 | -0.227  | 7.012  | 1.00 | 0.00 | TAG | N   |
| ATOM | 230 | CA   | PHE | 14 | -0.736 | 0.853   | 7.984  | 1.00 | 0.00 | TAG | C   |
| ATOM | 231 | C    | PHE | 14 | -0.064 | 0.364   | 9.244  | 1.00 | 0.00 | TAG | C   |
| ATOM | 232 | O    | PHE | 14 | 0.673  | 1.159   | 9.892  | 1.00 | 0.00 | TAG | O   |



|      |     |     |     |    |        |        |        |      |      |     |   |
|------|-----|-----|-----|----|--------|--------|--------|------|------|-----|---|
| ATOM | 233 | CB  | PHE | 14 | -2.137 | 1.429  | 8.352  | 1.00 | 0.00 | TAG | C |
| ATOM | 234 | CG  | PHE | 14 | -2.150 | 2.678  | 9.247  | 1.00 | 0.00 | TAG | C |
| ATOM | 235 | CD1 | PHE | 14 | -1.777 | 3.916  | 8.711  | 1.00 | 0.00 | TAG | C |
| ATOM | 236 | CD2 | PHE | 14 | -2.469 | 2.584  | 10.603 | 1.00 | 0.00 | TAG | C |
| ATOM | 237 | CE1 | PHE | 14 | -1.706 | 5.041  | 9.525  | 1.00 | 0.00 | TAG | C |
| ATOM | 238 | CE2 | PHE | 14 | -2.409 | 3.713  | 11.417 | 1.00 | 0.00 | TAG | C |
| ATOM | 239 | CZ  | PHE | 14 | -2.024 | 4.939  | 10.878 | 1.00 | 0.00 | TAG | C |
| ATOM | 240 | H   | PHE | 14 | -1.860 | -0.636 | 6.833  | 1.00 | 0.00 | TAG | H |
| ATOM | 241 | HA  | PHE | 14 | -0.104 | 1.650  | 7.546  | 1.00 | 0.00 | TAG | H |
| ATOM | 242 | 2HB | PHE | 14 | -2.740 | 0.641  | 8.845  | 1.00 | 0.00 | TAG | H |
| ATOM | 243 | 3HB | PHE | 14 | -2.705 | 1.647  | 7.425  | 1.00 | 0.00 | TAG | H |
| ATOM | 244 | 1HD | PHE | 14 | -1.499 | 3.995  | 7.668  | 1.00 | 0.00 | TAG | H |
| ATOM | 245 | 2HD | PHE | 14 | -2.748 | 1.631  | 11.033 | 1.00 | 0.00 | TAG | H |
| ATOM | 246 | 1HE | PHE | 14 | -1.388 | 5.985  | 9.108  | 1.00 | 0.00 | TAG | H |
| ATOM | 247 | 2HE | PHE | 14 | -2.649 | 3.633  | 12.467 | 1.00 | 0.00 | TAG | H |
| ATOM | 248 | HZ  | PHE | 14 | -1.963 | 5.813  | 11.509 | 1.00 | 0.00 | TAG | H |
| ATOM | 249 | N   | HIS | 15 | -0.221 | -0.910 | 9.632  | 1.00 | 0.00 | TAG | N |
| ATOM | 250 | CA  | HIS | 15 | 0.471  | -1.524 | 10.762 | 1.00 | 0.00 | TAG | C |
| ATOM | 251 | C   | HIS | 15 | 1.861  | -1.966 | 10.370 | 1.00 | 0.00 | TAG | C |
| ATOM | 252 | O   | HIS | 15 | 2.672  | -2.413 | 11.205 | 1.00 | 0.00 | TAG | O |
| ATOM | 253 | CB  | HIS | 15 | -0.378 | -2.736 | 11.182 | 1.00 | 0.00 | TAG | C |
| ATOM | 254 | CG  | HIS | 15 | -1.720 | -2.332 | 11.717 | 1.00 | 0.00 | TAG | C |
| ATOM | 255 | CD2 | HIS | 15 | -1.950 | -2.093 | 13.066 | 1.00 | 0.00 | TAG | C |
| ATOM | 256 | ND1 | HIS | 15 | -2.878 | -2.148 | 10.964 | 1.00 | 0.00 | TAG | N |
| ATOM | 257 | CE1 | HIS | 15 | -3.738 | -1.809 | 11.941 | 1.00 | 0.00 | TAG | C |
| ATOM | 258 | NE2 | HIS | 15 | -3.268 | -1.750 | 13.217 | 1.00 | 0.00 | TAG | N |
| ATOM | 259 | H   | HIS | 15 | -0.855 | -1.477 | 9.113  | 1.00 | 0.00 | TAG | H |
| ATOM | 260 | HA  | HIS | 15 | 0.593  | -0.752 | 11.539 | 1.00 | 0.00 | TAG | H |
| ATOM | 261 | 2HB | HIS | 15 | 0.135  | -3.333 | 11.963 | 1.00 | 0.00 | TAG | H |
| ATOM | 262 | 3HB | HIS | 15 | -0.549 | -3.439 | 10.340 | 1.00 | 0.00 | TAG | H |
| ATOM | 263 | 2HD | HIS | 15 | -1.194 | -2.173 | 13.842 | 1.00 | 0.00 | TAG | H |
| ATOM | 264 | 1HE | HIS | 15 | -4.761 | -1.598 | 11.658 | 1.00 | 0.00 | TAG | H |
| ATOM | 265 | 2HE | HIS | 15 | -3.770 | -1.511 | 14.084 | 1.00 | 0.00 | TAG | H |
| ATOM | 266 | N   | GLU | 16 | 2.230  | -1.863 | 9.088  | 1.00 | 1.00 | TAG | N |
| ATOM | 267 | CA  | GLU | 16 | 3.558  | -2.208 | 8.589  | 1.00 | 1.00 | TAG | C |
| ATOM | 268 | C   | GLU | 16 | 4.185  | -3.234 | 9.525  | 1.00 | 1.00 | TAG | C |
| ATOM | 269 | O   | GLU | 16 | 5.412  | -3.426 | 9.484  | 1.00 | 1.00 | TAG | O |
| ATOM | 270 | CB  | GLU | 16 | 4.443  | -0.969 | 8.533  | 1.00 | 1.00 | TAG | C |
| ATOM | 271 | CG  | GLU | 16 | 5.820  | -1.221 | 7.938  | 1.00 | 1.00 | TAG | C |
| ATOM | 272 | CD  | GLU | 16 | 6.760  | -0.042 | 8.106  | 1.00 | 1.00 | TAG | C |
| ATOM | 273 | OE1 | GLU | 16 | 6.489  | 0.825  | 8.964  | 1.00 | 1.00 | TAG | O |
| ATOM | 274 | OE2 | GLU | 16 | 7.797  | 0.010  | 7.406  | 1.00 | 1.00 | TAG | O |
| ATOM | 275 | H   | GLU | 16 | 1.608  | -1.547 | 8.372  | 1.00 | 1.00 | TAG | H |
| ATOM | 276 | HA  | GLU | 16 | 3.465  | -2.623 | 7.575  | 1.00 | 1.00 | TAG | H |
| ATOM | 277 | 1HB | GLU | 16 | 3.935  | -0.194 | 7.940  | 1.00 | 1.00 | TAG | H |
| ATOM | 278 | 2HB | GLU | 16 | 4.563  | -0.568 | 9.551  | 1.00 | 1.00 | TAG | H |
| ATOM | 279 | 1HG | GLU | 16 | 6.263  | -2.107 | 8.415  | 1.00 | 1.00 | TAG | H |
| ATOM | 280 | 2HG | GLU | 16 | 5.715  | -1.450 | 6.868  | 1.00 | 1.00 | TAG | H |
| ATOM | 281 | H01 | GLU | 16 | 8.008  | 0.926  | 7.213  | 1.00 | 1.00 | TAG | H |
| ATOM | 282 | N   | LYS | 17 | 3.409  | -3.899 | 10.352 | 1.00 | 1.00 | TAG | N |
| ATOM | 283 | CA  | LYS | 17 | 3.880  | -4.969 | 11.225 | 1.00 | 1.00 | TAG | C |

|      |     |     |     |    |        |         |        |      |      |         |
|------|-----|-----|-----|----|--------|---------|--------|------|------|---------|
| ATOM | 284 | C   | LYS | 17 | 3.924  | -6.273  | 10.455 | 1.00 | 1.00 | TAG C   |
| ATOM | 285 | O   | LYS | 17 | 4.998  | -6.853  | 10.263 | 1.00 | 1.00 | TAG O   |
| ATOM | 286 | CB  | LYS | 17 | 2.957  | -5.099  | 12.439 | 1.00 | 1.00 | TAG C   |
| ATOM | 287 | CG  | LYS | 17 | 3.378  | -6.142  | 13.452 | 1.00 | 1.00 | TAG C   |
| ATOM | 288 | CD  | LYS | 17 | 2.789  | -5.793  | 14.807 | 1.00 | 1.00 | TAG C   |
| ATOM | 289 | CE  | LYS | 17 | 3.141  | -6.813  | 15.872 | 1.00 | 1.00 | TAG C   |
| ATOM | 290 | NZ  | LYS | 17 | 2.289  | -8.012  | 15.738 | 1.00 | 1.00 | TAG N1+ |
| ATOM | 291 | H   | LYS | 17 | 2.430  | -3.716  | 10.442 | 1.00 | 1.00 | TAG H   |
| ATOM | 292 | HA  | LYS | 17 | 4.893  | -4.730  | 11.579 | 1.00 | 1.00 | TAG H   |
| ATOM | 293 | 1HB | LYS | 17 | 2.898  | -4.123  | 12.942 | 1.00 | 1.00 | TAG H   |
| ATOM | 294 | 2HB | LYS | 17 | 1.943  | -5.341  | 12.085 | 1.00 | 1.00 | TAG H   |
| ATOM | 295 | 1HG | LYS | 17 | 3.036  | -7.138  | 13.135 | 1.00 | 1.00 | TAG H   |
| ATOM | 296 | 2HG | LYS | 17 | 4.476  | -6.185  | 13.516 | 1.00 | 1.00 | TAG H   |
| ATOM | 297 | 1HD | LYS | 17 | 3.152  | -4.803  | 15.117 | 1.00 | 1.00 | TAG H   |
| ATOM | 298 | 2HD | LYS | 17 | 1.694  | -5.720  | 14.720 | 1.00 | 1.00 | TAG H   |
| ATOM | 299 | 1HE | LYS | 17 | 4.200  | -7.095  | 15.783 | 1.00 | 1.00 | TAG H   |
| ATOM | 300 | 2HE | LYS | 17 | 3.009  | -6.371  | 16.871 | 1.00 | 1.00 | TAG H   |
| ATOM | 301 | 1HZ | LYS | 17 | 2.116  | -8.402  | 16.643 | 1.00 | 1.00 | TAG H   |
| ATOM | 302 | 2HZ | LYS | 17 | 1.420  | -7.759  | 15.314 | 1.00 | 1.00 | TAG H   |
| ATOM | 303 | 3HZ | LYS | 17 | 2.754  | -8.690  | 15.168 | 1.00 | 1.00 | TAG H   |
| ATOM | 304 | N   | HIS | 18 | 2.816  | -6.677  | 9.853  | 1.00 | 0.00 | TAG N   |
| ATOM | 305 | CA  | HIS | 18 | 2.629  | -7.976  | 9.213  | 1.00 | 0.00 | TAG C   |
| ATOM | 306 | C   | HIS | 18 | 3.400  | -8.058  | 7.918  | 1.00 | 0.00 | TAG C   |
| ATOM | 307 | O   | HIS | 18 | 4.121  | -9.049  | 7.635  | 1.00 | 0.00 | TAG O   |
| ATOM | 308 | CB  | HIS | 18 | 1.120  | -8.113  | 8.948  | 1.00 | 0.00 | TAG C   |
| ATOM | 309 | CG  | HIS | 18 | 0.326  | -8.216  | 10.218 | 1.00 | 0.00 | TAG C   |
| ATOM | 310 | CD2 | HIS | 18 | -0.076 | -9.432  | 10.755 | 1.00 | 0.00 | TAG C   |
| ATOM | 311 | ND1 | HIS | 18 | -0.101 | -7.147  | 11.002 | 1.00 | 0.00 | TAG N   |
| ATOM | 312 | CE1 | HIS | 18 | -0.747 | -7.817  | 11.974 | 1.00 | 0.00 | TAG C   |
| ATOM | 313 | NE2 | HIS | 18 | -0.778 | -9.176  | 11.904 | 1.00 | 0.00 | TAG N   |
| ATOM | 314 | H   | HIS | 18 | 2.051  | -6.045  | 9.835  | 1.00 | 0.00 | TAG H   |
| ATOM | 315 | HA  | HIS | 18 | 3.053  | -8.743  | 9.883  | 1.00 | 0.00 | TAG H   |
| ATOM | 316 | 2HB | HIS | 18 | 0.901  | -9.010  | 8.336  | 1.00 | 0.00 | TAG H   |
| ATOM | 317 | 3HB | HIS | 18 | 0.717  | -7.256  | 8.369  | 1.00 | 0.00 | TAG H   |
| ATOM | 318 | 2HD | HIS | 18 | 0.144  | -10.401 | 10.316 | 1.00 | 0.00 | TAG H   |
| ATOM | 319 | 1HE | HIS | 18 | -1.208 | -7.237  | 12.763 | 1.00 | 0.00 | TAG H   |
| ATOM | 320 | 2HE | HIS | 18 | -1.217 | -9.850  | 12.547 | 1.00 | 0.00 | TAG H   |
| ATOM | 321 | N   | HIS | 19 | 3.157  | -7.158  | 6.984  | 1.00 | 1.00 | TAG N   |
| ATOM | 322 | CA  | HIS | 19 | 3.721  | -7.223  | 5.644  | 1.00 | 1.00 | TAG C   |
| ATOM | 323 | C   | HIS | 19 | 4.792  | -6.173  | 5.342  | 1.00 | 1.00 | TAG C   |
| ATOM | 324 | O   | HIS | 19 | 5.902  | -6.355  | 4.828  | 1.00 | 1.00 | TAG O   |
| ATOM | 325 | CB  | HIS | 19 | 2.619  | -7.215  | 4.593  | 1.00 | 1.00 | TAG C   |
| ATOM | 326 | CG  | HIS | 19 | 1.972  | -8.549  | 4.403  | 1.00 | 1.00 | TAG C   |
| ATOM | 327 | CD2 | HIS | 19 | 0.824  | -8.922  | 5.067  | 1.00 | 1.00 | TAG C   |
| ATOM | 328 | ND1 | HIS | 19 | 2.331  | -9.620  | 3.649  | 1.00 | 1.00 | TAG N   |
| ATOM | 329 | CE1 | HIS | 19 | 1.405  | -10.606 | 3.869  | 1.00 | 1.00 | TAG C   |
| ATOM | 330 | NE2 | HIS | 19 | 0.502  | -10.165 | 4.732  | 1.00 | 1.00 | TAG N   |
| ATOM | 331 | H   | HIS | 19 | 2.551  | -6.376  | 7.128  | 1.00 | 1.00 | TAG H   |
| ATOM | 332 | HA  | HIS | 19 | 4.257  | -8.182  | 5.600  | 1.00 | 1.00 | TAG H   |
| ATOM | 333 | 1HB | HIS | 19 | 1.852  | -6.481  | 4.881  | 1.00 | 1.00 | TAG H   |
| ATOM | 334 | 2HB | HIS | 19 | 3.040  | -6.880  | 3.633  | 1.00 | 1.00 | TAG H   |

|      |     |     |     |    |        |         |        |      |      |     |     |
|------|-----|-----|-----|----|--------|---------|--------|------|------|-----|-----|
| ATOM | 335 | HD2 | HIS | 19 | 0.261  | -8.288  | 5.768  | 1.00 | 1.00 | TAG | H   |
| ATOM | 336 | HE1 | HIS | 19 | 1.411  | -11.603 | 3.405  | 1.00 | 1.00 | TAG | H   |
| ATOM | 337 | HE2 | HIS | 19 | -0.286 | -10.678 | 5.071  | 1.00 | 1.00 | TAG | H   |
| ATOM | 338 | N   | SER | 20 | 4.388  | -4.883  | 5.723  | 1.00 | 1.00 | TAG | N   |
| ATOM | 339 | CA  | SER | 20 | 5.217  | -3.714  | 5.426  | 1.00 | 1.00 | TAG | C   |
| ATOM | 340 | C   | SER | 20 | 6.615  | -3.770  | 6.026  | 1.00 | 1.00 | TAG | C   |
| ATOM | 341 | O   | SER | 20 | 7.671  | -3.703  | 5.418  | 1.00 | 1.00 | TAG | O   |
| ATOM | 342 | CB  | SER | 20 | 4.519  | -2.450  | 5.935  | 1.00 | 1.00 | TAG | C   |
| ATOM | 343 | OG  | SER | 20 | 5.364  | -1.323  | 5.792  | 1.00 | 1.00 | TAG | O   |
| ATOM | 344 | H   | SER | 20 | 3.538  | -4.679  | 6.208  | 1.00 | 1.00 | TAG | H   |
| ATOM | 345 | HA  | SER | 20 | 5.340  | -3.702  | 4.332  | 1.00 | 1.00 | TAG | H   |
| ATOM | 346 | 1HB | SER | 20 | 3.586  | -2.289  | 5.375  | 1.00 | 1.00 | TAG | H   |
| ATOM | 347 | 2HB | SER | 20 | 4.242  | -2.577  | 6.992  | 1.00 | 1.00 | TAG | H   |
| ATOM | 348 | HG  | SER | 20 | 5.921  | -1.426  | 4.967  | 1.00 | 1.00 | TAG | H   |
| ATOM | 349 | N   | HIS | 21 | 6.679  | -3.939  | 7.431  | 1.00 | 0.00 | TAG | N   |
| ATOM | 350 | CA  | HIS | 21 | 7.976  | -4.035  | 8.094  | 1.00 | 0.00 | TAG | C   |
| ATOM | 351 | C   | HIS | 21 | 8.503  | -5.449  | 8.053  | 1.00 | 0.00 | TAG | C   |
| ATOM | 352 | O   | HIS | 21 | 9.487  | -5.899  | 8.719  | 1.00 | 0.00 | TAG | O   |
| ATOM | 353 | CB  | HIS | 21 | 7.752  | -3.589  | 9.548  | 1.00 | 0.00 | TAG | C   |
| ATOM | 354 | CG  | HIS | 21 | 9.034  | -3.212  | 10.233 | 1.00 | 0.00 | TAG | C   |
| ATOM | 355 | CD2 | HIS | 21 | 9.397  | -1.893  | 10.472 | 1.00 | 0.00 | TAG | C   |
| ATOM | 356 | ND1 | HIS | 21 | 9.999  | -4.099  | 10.705 | 1.00 | 0.00 | TAG | N   |
| ATOM | 357 | CE1 | HIS | 21 | 10.894 | -3.224  | 11.200 | 1.00 | 0.00 | TAG | C   |
| ATOM | 358 | NE2 | HIS | 21 | 10.612 | -1.896  | 11.105 | 1.00 | 0.00 | TAG | N   |
| ATOM | 359 | H   | HIS | 21 | 5.846  | -3.993  | 7.962  | 1.00 | 0.00 | TAG | H   |
| ATOM | 360 | HA  | HIS | 21 | 8.689  | -3.416  | 7.524  | 1.00 | 0.00 | TAG | H   |
| ATOM | 361 | 2HB | HIS | 21 | 7.272  | -4.390  | 10.144 | 1.00 | 0.00 | TAG | H   |
| ATOM | 362 | 3HB | HIS | 21 | 7.066  | -2.719  | 9.618  | 1.00 | 0.00 | TAG | H   |
| ATOM | 363 | 2HD | HIS | 21 | 8.799  | -1.030  | 10.193 | 1.00 | 0.00 | TAG | H   |
| ATOM | 364 | 1HE | HIS | 21 | 11.791 | -3.627  | 11.651 | 1.00 | 0.00 | TAG | H   |
| ATOM | 365 | 2HE | HIS | 21 | 11.168 | -1.089  | 11.424 | 1.00 | 0.00 | TAG | H   |
| ATOM | 366 | N   | ARG | 22 | 7.908  | -6.270  | 7.196  | 1.00 | 0.00 | TAG | N   |
| ATOM | 367 | CA  | ARG | 22 | 8.372  | -7.618  | 6.882  | 1.00 | 0.00 | TAG | C   |
| ATOM | 368 | C   | ARG | 22 | 9.167  | -7.631  | 5.598  | 1.00 | 0.00 | TAG | C   |
| ATOM | 369 | O   | ARG | 22 | 9.918  | -8.505  | 5.345  | 1.00 | 0.00 | TAG | O   |
| ATOM | 370 | CB  | ARG | 22 | 7.140  | -8.564  | 6.795  | 1.00 | 0.00 | TAG | C   |
| ATOM | 371 | CG  | ARG | 22 | 6.311  | -8.704  | 8.103  | 1.00 | 0.00 | TAG | C   |
| ATOM | 372 | CD  | ARG | 22 | 7.072  | -9.482  | 9.189  | 1.00 | 0.00 | TAG | C   |
| ATOM | 373 | NE  | ARG | 22 | 6.189  | -9.682  | 10.375 | 1.00 | 0.00 | TAG | N   |
| ATOM | 374 | CZ  | ARG | 22 | 6.513  | -10.367 | 11.468 | 1.00 | 0.00 | TAG | C   |
| ATOM | 375 | NH1 | ARG | 22 | 7.665  | -10.952 | 11.638 | 1.00 | 0.00 | TAG | N   |
| ATOM | 376 | NH2 | ARG | 22 | 5.636  | -10.461 | 12.418 | 1.00 | 0.00 | TAG | N1+ |
| ATOM | 377 | H   | ARG | 22 | 7.079  | -5.939  | 6.730  | 1.00 | 0.00 | TAG | H   |
| ATOM | 378 | HA  | ARG | 22 | 9.045  | -7.947  | 7.696  | 1.00 | 0.00 | TAG | H   |
| ATOM | 379 | 2HB | ARG | 22 | 7.481  | -9.562  | 6.451  | 1.00 | 0.00 | TAG | H   |
| ATOM | 380 | 3HB | ARG | 22 | 6.468  | -8.211  | 5.987  | 1.00 | 0.00 | TAG | H   |
| ATOM | 381 | 2HG | ARG | 22 | 5.347  | -9.203  | 7.871  | 1.00 | 0.00 | TAG | H   |
| ATOM | 382 | 3HG | ARG | 22 | 6.041  | -7.701  | 8.492  | 1.00 | 0.00 | TAG | H   |
| ATOM | 383 | 2HD | ARG | 22 | 7.991  | -8.920  | 9.468  | 1.00 | 0.00 | TAG | H   |
| ATOM | 384 | 3HD | ARG | 22 | 7.412  | -10.457 | 8.778  | 1.00 | 0.00 | TAG | H   |
| ATOM | 385 | HE  | ARG | 22 | 5.245  | -9.283  | 10.403 | 1.00 | 0.00 | TAG | H   |

|      |     |      |     |    |        |         |        |      |      |       |
|------|-----|------|-----|----|--------|---------|--------|------|------|-------|
| ATOM | 386 | 1HH1 | ARG | 22 | 8.311  | -10.839 | 10.853 | 1.00 | 0.00 | TAG H |
| ATOM | 387 | 2HH1 | ARG | 22 | 7.837  | -11.461 | 12.507 | 1.00 | 0.00 | TAG H |
| ATOM | 388 | H01  | ARG | 22 | 5.477  | -9.549  | 12.822 | 1.00 | 0.00 | TAG H |
| ATOM | 389 | H02  | ARG | 22 | 5.977  | -11.090 | 13.131 | 1.00 | 0.00 | TAG H |
| ATOM | 390 | H03  | ARG | 22 | 4.769  | -10.818 | 12.041 | 1.00 | 0.00 | TAG H |
| ATOM | 391 | N    | GLY | 23 | 9.069  | -6.672  | 4.818  | 1.00 | 1.00 | TAG N |
| ATOM | 392 | CA   | GLY | 23 | 9.552  | -6.640  | 3.441  | 1.00 | 1.00 | TAG C |
| ATOM | 393 | C    | GLY | 23 | 9.266  | -7.956  | 2.720  | 1.00 | 1.00 | TAG C |
| ATOM | 394 | O    | GLY | 23 | 9.916  | -8.278  | 1.723  | 1.00 | 1.00 | TAG O |
| ATOM | 395 | H    | GLY | 23 | 8.632  | -5.808  | 5.068  | 1.00 | 1.00 | TAG H |
| ATOM | 396 | 1HA  | GLY | 23 | 9.072  | -5.812  | 2.901  | 1.00 | 1.00 | TAG H |
| ATOM | 397 | 2HA  | GLY | 23 | 10.634 | -6.444  | 3.435  | 1.00 | 1.00 | TAG H |
| ATOM | 398 | N    | TYR | 24 | 8.310  | -8.706  | 3.187  | 1.00 | 0.00 | TAG N |
| ATOM | 399 | CA   | TYR | 24 | 7.828  | -9.953  | 2.600  | 1.00 | 0.00 | TAG C |
| ATOM | 400 | C    | TYR | 24 | 8.143  | -10.014 | 1.125  | 1.00 | 0.00 | TAG C |
| ATOM | 401 | O    | TYR | 24 | 7.683  | -9.205  | 0.314  | 1.00 | 0.00 | TAG O |
| ATOM | 402 | CB   | TYR | 24 | 6.286  | -10.086 | 2.768  | 1.00 | 0.00 | TAG C |
| ATOM | 403 | CG   | TYR | 24 | 5.639  | -11.357 | 2.205  | 1.00 | 0.00 | TAG C |
| ATOM | 404 | CD1  | TYR | 24 | 5.731  | -12.570 | 2.896  | 1.00 | 0.00 | TAG C |
| ATOM | 405 | CD2  | TYR | 24 | 4.943  | -11.305 | 0.994  | 1.00 | 0.00 | TAG C |
| ATOM | 406 | CE1  | TYR | 24 | 5.127  | -13.714 | 2.382  | 1.00 | 0.00 | TAG C |
| ATOM | 407 | CE2  | TYR | 24 | 4.340  | -12.449 | 0.482  | 1.00 | 0.00 | TAG C |
| ATOM | 408 | CZ   | TYR | 24 | 4.433  | -13.654 | 1.176  | 1.00 | 0.00 | TAG C |
| ATOM | 409 | OH   | TYR | 24 | 3.839  | -14.778 | 0.677  | 1.00 | 0.00 | TAG O |
| ATOM | 410 | OXT  | TYR | 24 | 9.013  | -11.054 | 0.639  | 0.00 | 0.00 | TAG O |
| ATOM | 411 | H    | TYR | 24 | 7.843  | -8.385  | 4.066  | 1.00 | 0.00 | TAG H |
| ATOM | 412 | HA   | TYR | 24 | 8.339  | -10.802 | 3.092  | 1.00 | 0.00 | TAG H |
| ATOM | 413 | 2HB  | TYR | 24 | 5.784  | -9.219  | 2.294  | 1.00 | 0.00 | TAG H |
| ATOM | 414 | 3HB  | TYR | 24 | 6.023  | -9.981  | 3.841  | 1.00 | 0.00 | TAG H |
| ATOM | 415 | 1HD  | TYR | 24 | 6.263  | -12.625 | 3.835  | 1.00 | 0.00 | TAG H |
| ATOM | 416 | 2HD  | TYR | 24 | 4.857  | -10.371 | 0.455  | 1.00 | 0.00 | TAG H |
| ATOM | 417 | 1HE  | TYR | 24 | 5.191  | -14.650 | 2.917  | 1.00 | 0.00 | TAG H |
| ATOM | 418 | 2HE  | TYR | 24 | 3.799  | -12.394 | -0.451 | 1.00 | 0.00 | TAG H |
| ATOM | 419 | HH   | TYR | 24 | 3.409  | -14.552 | -0.151 | 1.00 | 0.00 | TAG H |
| ATOM | 420 | H01  | TYR | 24 | 9.176  | -10.923 | -0.297 | 0.00 | 0.00 | TAG H |
| END  |     |      |     |    |        |         |        |      |      |       |

### Histatin conformer 6:

|      |    |     |     |   |        |        |        |      |      |         |
|------|----|-----|-----|---|--------|--------|--------|------|------|---------|
| ATOM | 1  | N   | ASP | 1 | -0.753 | -1.254 | -0.000 | 1.00 | 1.00 | TAG N1+ |
| ATOM | 2  | CA  | ASP | 1 | 0.000  | 0.000  | 0.000  | 1.00 | 1.00 | TAG C   |
| ATOM | 3  | C   | ASP | 1 | -0.977 | 1.163  | 0.124  | 1.00 | 1.00 | TAG C   |
| ATOM | 4  | O   | ASP | 1 | -0.987 | 1.874  | 1.139  | 1.00 | 1.00 | TAG O   |
| ATOM | 5  | CB  | ASP | 1 | 0.960  | 0.222  | -1.175 | 1.00 | 1.00 | TAG C   |
| ATOM | 6  | CG  | ASP | 1 | 1.836  | 1.487  | -1.016 | 1.00 | 1.00 | TAG C   |
| ATOM | 7  | OD1 | ASP | 1 | 1.995  | 2.026  | 0.114  | 1.00 | 1.00 | TAG O   |
| ATOM | 8  | OD2 | ASP | 1 | 2.382  | 1.948  | -2.048 | 1.00 | 1.00 | TAG O   |
| ATOM | 9  | 1H  | ASP | 1 | -0.117 | -2.025 | -0.000 | 1.00 | 1.00 | TAG H   |
| ATOM | 10 | 2H  | ASP | 1 | -1.329 | -1.298 | 0.816  | 1.00 | 1.00 | TAG H   |
| ATOM | 11 | 3H  | ASP | 1 | -1.329 | -1.298 | -0.816 | 1.00 | 1.00 | TAG H   |
| ATOM | 12 | HA  | ASP | 1 | 0.619  | -0.065 | 0.906  | 1.00 | 1.00 | TAG H   |

|      |    |     |     |   |         |        |        |      |      |     |   |
|------|----|-----|-----|---|---------|--------|--------|------|------|-----|---|
| ATOM | 13 | 1HB | ASP | 1 | 1.613   | -0.658 | -1.278 | 1.00 | 1.00 | TAG | H |
| ATOM | 14 | 2HB | ASP | 1 | 0.379   | 0.301  | -2.105 | 1.00 | 1.00 | TAG | H |
| ATOM | 15 | H01 | ASP | 1 | 2.425   | 2.905  | -1.988 | 1.00 | 1.00 | TAG | H |
| ATOM | 16 | N   | SER | 2 | -1.793  | 1.390  | -0.846 | 1.00 | 1.00 | TAG | N |
| ATOM | 17 | CA  | SER | 2 | -2.716  | 2.526  | -0.879 | 1.00 | 1.00 | TAG | C |
| ATOM | 18 | C   | SER | 2 | -4.177  | 2.137  | -1.044 | 1.00 | 1.00 | TAG | C |
| ATOM | 19 | O   | SER | 2 | -5.131  | 2.569  | -0.414 | 1.00 | 1.00 | TAG | O |
| ATOM | 20 | CB  | SER | 2 | -2.329  | 3.466  | -2.024 | 1.00 | 1.00 | TAG | C |
| ATOM | 21 | OG  | SER | 2 | -3.292  | 4.492  | -2.171 | 1.00 | 1.00 | TAG | O |
| ATOM | 22 | H   | SER | 2 | -1.855  | 0.803  | -1.653 | 1.00 | 1.00 | TAG | H |
| ATOM | 23 | HA  | SER | 2 | -2.625  | 3.016  | 0.101  | 1.00 | 1.00 | TAG | H |
| ATOM | 24 | 1HB | SER | 2 | -1.341  | 3.908  | -1.826 | 1.00 | 1.00 | TAG | H |
| ATOM | 25 | 2HB | SER | 2 | -2.244  | 2.897  | -2.961 | 1.00 | 1.00 | TAG | H |
| ATOM | 26 | HG  | SER | 2 | -3.023  | 5.098  | -2.920 | 1.00 | 1.00 | TAG | H |
| ATOM | 27 | N   | HIS | 3 | -4.390  | 1.184  | -2.030 | 1.00 | 1.00 | TAG | N |
| ATOM | 28 | CA  | HIS | 3 | -5.717  | 0.551  | -2.216 | 1.00 | 1.00 | TAG | C |
| ATOM | 29 | C   | HIS | 3 | -5.676  | -0.869 | -1.702 | 1.00 | 1.00 | TAG | C |
| ATOM | 30 | O   | HIS | 3 | -6.685  | -1.368 | -1.141 | 1.00 | 1.00 | TAG | O |
| ATOM | 31 | CB  | HIS | 3 | -5.979  | 0.564  | -3.827 | 1.00 | 1.00 | TAG | C |
| ATOM | 32 | CG  | HIS | 3 | -7.275  | -0.191 | -4.018 | 1.00 | 1.00 | TAG | C |
| ATOM | 33 | CD2 | HIS | 3 | -8.539  | 0.160  | -3.712 | 1.00 | 1.00 | TAG | C |
| ATOM | 34 | ND1 | HIS | 3 | -7.403  | -1.406 | -4.678 | 1.00 | 1.00 | TAG | N |
| ATOM | 35 | CE1 | HIS | 3 | -8.725  | -1.729 | -4.610 | 1.00 | 1.00 | TAG | C |
| ATOM | 36 | NE2 | HIS | 3 | -9.425  | -0.729 | -4.077 | 1.00 | 1.00 | TAG | N |
| ATOM | 37 | H   | HIS | 3 | -3.685  | 0.867  | -2.665 | 1.00 | 1.00 | TAG | H |
| ATOM | 38 | HA  | HIS | 3 | -6.514  | 1.079  | -1.672 | 1.00 | 1.00 | TAG | H |
| ATOM | 39 | 1HB | HIS | 3 | -6.058  | 1.593  | -4.210 | 1.00 | 1.00 | TAG | H |
| ATOM | 40 | 2HB | HIS | 3 | -5.153  | 0.081  | -4.370 | 1.00 | 1.00 | TAG | H |
| ATOM | 41 | HD2 | HIS | 3 | -8.799  | 1.102  | -3.207 | 1.00 | 1.00 | TAG | H |
| ATOM | 42 | HE1 | HIS | 3 | -9.155  | -2.684 | -4.948 | 1.00 | 1.00 | TAG | H |
| ATOM | 43 | HE2 | HIS | 3 | -10.418 | -0.671 | -3.977 | 1.00 | 1.00 | TAG | H |
| ATOM | 44 | N   | ALA | 4 | -4.565  | -1.562 | -1.869 | 1.00 | 1.00 | TAG | N |
| ATOM | 45 | CA  | ALA | 4 | -4.424  | -2.943 | -1.447 | 1.00 | 1.00 | TAG | C |
| ATOM | 46 | C   | ALA | 4 | -4.400  | -3.018 | 0.089  | 1.00 | 1.00 | TAG | C |
| ATOM | 47 | O   | ALA | 4 | -5.147  | -3.798 | 0.673  | 1.00 | 1.00 | TAG | O |
| ATOM | 48 | CB  | ALA | 4 | -3.134  | -3.523 | -2.024 | 1.00 | 1.00 | TAG | C |
| ATOM | 49 | H   | ALA | 4 | -3.744  | -1.185 | -2.297 | 1.00 | 1.00 | TAG | H |
| ATOM | 50 | HA  | ALA | 4 | -5.279  | -3.528 | -1.818 | 1.00 | 1.00 | TAG | H |
| ATOM | 51 | 1HB | ALA | 4 | -3.027  | -4.570 | -1.704 | 1.00 | 1.00 | TAG | H |
| ATOM | 52 | 2HB | ALA | 4 | -3.169  | -3.477 | -3.122 | 1.00 | 1.00 | TAG | H |
| ATOM | 53 | 3HB | ALA | 4 | -2.275  | -2.939 | -1.661 | 1.00 | 1.00 | TAG | H |
| ATOM | 54 | N   | LYS | 5 | -3.589  | -2.259 | 0.740  | 1.00 | 1.00 | TAG | N |
| ATOM | 55 | CA  | LYS | 5 | -3.540  | -2.223 | 2.197  | 1.00 | 1.00 | TAG | C |
| ATOM | 56 | C   | LYS | 5 | -4.882  | -1.766 | 2.756  | 1.00 | 1.00 | TAG | C |
| ATOM | 57 | O   | LYS | 5 | -5.304  | -2.239 | 3.796  | 1.00 | 1.00 | TAG | O |
| ATOM | 58 | CB  | LYS | 5 | -2.425  | -1.286 | 2.672  | 1.00 | 1.00 | TAG | C |
| ATOM | 59 | CG  | LYS | 5 | -1.043  | -1.853 | 2.469  | 1.00 | 1.00 | TAG | C |
| ATOM | 60 | CD  | LYS | 5 | 0.029   | -0.881 | 2.912  | 1.00 | 1.00 | TAG | C |
| ATOM | 61 | CE  | LYS | 5 | 1.405   | -1.485 | 2.653  | 1.00 | 1.00 | TAG | C |
| ATOM | 62 | NZ  | LYS | 5 | 2.511   | -0.510 | 2.838  | 1.00 | 1.00 | TAG | N |
| ATOM | 63 | H   | LYS | 5 | -2.938  | -1.643 | 0.298  | 1.00 | 1.00 | TAG | H |

|      |     |      |     |   |         |        |        |      |      |         |
|------|-----|------|-----|---|---------|--------|--------|------|------|---------|
| ATOM | 64  | HA   | LYS | 5 | -3.328  | -3.238 | 2.564  | 1.00 | 1.00 | TAG H   |
| ATOM | 65  | 1HB  | LYS | 5 | -2.505  | -0.330 | 2.134  | 1.00 | 1.00 | TAG H   |
| ATOM | 66  | 2HB  | LYS | 5 | -2.571  | -1.067 | 3.741  | 1.00 | 1.00 | TAG H   |
| ATOM | 67  | 1HG  | LYS | 5 | -0.944  | -2.792 | 3.033  | 1.00 | 1.00 | TAG H   |
| ATOM | 68  | 2HG  | LYS | 5 | -0.899  | -2.100 | 1.407  | 1.00 | 1.00 | TAG H   |
| ATOM | 69  | 1HD  | LYS | 5 | -0.075  | 0.069  | 2.368  | 1.00 | 1.00 | TAG H   |
| ATOM | 70  | 2HD  | LYS | 5 | -0.088  | -0.654 | 3.983  | 1.00 | 1.00 | TAG H   |
| ATOM | 71  | 1HE  | LYS | 5 | 1.559   | -2.338 | 3.330  | 1.00 | 1.00 | TAG H   |
| ATOM | 72  | 2HE  | LYS | 5 | 1.439   | -1.880 | 1.627  | 1.00 | 1.00 | TAG H   |
| ATOM | 73  | H01  | LYS | 5 | 2.775   | -0.480 | 3.812  | 1.00 | 1.00 | TAG H   |
| ATOM | 74  | H02  | LYS | 5 | 2.205   | 0.406  | 2.543  | 1.00 | 1.00 | TAG H   |
| ATOM | 75  | N    | ARG | 6 | -5.577  | -0.845 | 2.057  | 1.00 | 0.00 | TAG N   |
| ATOM | 76  | CA   | ARG | 6 | -6.902  | -0.399 | 2.479  | 1.00 | 0.00 | TAG C   |
| ATOM | 77  | C    | ARG | 6 | -7.940  | -1.465 | 2.217  | 1.00 | 0.00 | TAG C   |
| ATOM | 78  | O    | ARG | 6 | -8.874  | -1.621 | 3.012  | 1.00 | 0.00 | TAG O   |
| ATOM | 79  | CB   | ARG | 6 | -7.246  | 0.923  | 1.735  | 1.00 | 0.00 | TAG C   |
| ATOM | 80  | CG   | ARG | 6 | -8.605  | 1.573  | 2.120  | 1.00 | 0.00 | TAG C   |
| ATOM | 81  | CD   | ARG | 6 | -8.810  | 2.933  | 1.433  | 1.00 | 0.00 | TAG C   |
| ATOM | 82  | NE   | ARG | 6 | -10.126 | 3.507  | 1.839  | 1.00 | 0.00 | TAG N   |
| ATOM | 83  | CZ   | ARG | 6 | -10.644 | 4.643  | 1.380  | 1.00 | 0.00 | TAG C   |
| ATOM | 84  | NH1  | ARG | 6 | -10.054 | 5.401  | 0.500  | 1.00 | 0.00 | TAG N   |
| ATOM | 85  | NH2  | ARG | 6 | -11.798 | 5.020  | 1.832  | 1.00 | 0.00 | TAG N1+ |
| ATOM | 86  | H    | ARG | 6 | -5.180  | -0.462 | 1.238  | 1.00 | 0.00 | TAG H   |
| ATOM | 87  | HA   | ARG | 6 | -6.872  | -0.223 | 3.571  | 1.00 | 0.00 | TAG H   |
| ATOM | 88  | 2HB  | ARG | 6 | -7.210  | 0.735  | 0.642  | 1.00 | 0.00 | TAG H   |
| ATOM | 89  | 3HB  | ARG | 6 | -6.438  | 1.661  | 1.913  | 1.00 | 0.00 | TAG H   |
| ATOM | 90  | 2HG  | ARG | 6 | -8.656  | 1.683  | 3.223  | 1.00 | 0.00 | TAG H   |
| ATOM | 91  | 3HG  | ARG | 6 | -9.441  | 0.896  | 1.849  | 1.00 | 0.00 | TAG H   |
| ATOM | 92  | 2HD  | ARG | 6 | -8.759  | 2.799  | 0.330  | 1.00 | 0.00 | TAG H   |
| ATOM | 93  | 3HD  | ARG | 6 | -7.977  | 3.616  | 1.706  | 1.00 | 0.00 | TAG H   |
| ATOM | 94  | HE   | ARG | 6 | -10.720 | 3.032  | 2.526  | 1.00 | 0.00 | TAG H   |
| ATOM | 95  | 1HH1 | ARG | 6 | -9.148  | 5.047  | 0.183  | 1.00 | 0.00 | TAG H   |
| ATOM | 96  | 2HH1 | ARG | 6 | -10.517 | 6.260  | 0.198  | 1.00 | 0.00 | TAG H   |
| ATOM | 97  | H01  | ARG | 6 | -12.055 | 5.901  | 1.410  | 1.00 | 0.00 | TAG H   |
| ATOM | 98  | H02  | ARG | 6 | -11.748 | 5.129  | 2.835  | 1.00 | 0.00 | TAG H   |
| ATOM | 99  | H03  | ARG | 6 | -12.492 | 4.323  | 1.604  | 1.00 | 0.00 | TAG H   |
| ATOM | 100 | N    | HIS | 7 | -7.843  | -2.183 | 1.115  | 1.00 | 1.00 | TAG N   |
| ATOM | 101 | CA   | HIS | 7 | -8.765  | -3.261 | 0.789  | 1.00 | 1.00 | TAG C   |
| ATOM | 102 | C    | HIS | 7 | -8.423  | -4.614 | 1.416  | 1.00 | 1.00 | TAG C   |
| ATOM | 103 | O    | HIS | 7 | -9.291  | -5.479 | 1.609  | 1.00 | 1.00 | TAG O   |
| ATOM | 104 | CB   | HIS | 7 | -8.950  | -3.377 | -0.719 | 1.00 | 1.00 | TAG C   |
| ATOM | 105 | CG   | HIS | 7 | -9.905  | -2.370 | -1.275 | 1.00 | 1.00 | TAG C   |
| ATOM | 106 | CD2  | HIS | 7 | -9.496  | -1.160 | -1.793 | 1.00 | 1.00 | TAG C   |
| ATOM | 107 | ND1  | HIS | 7 | -11.260 | -2.376 | -1.366 | 1.00 | 1.00 | TAG N   |
| ATOM | 108 | CE1  | HIS | 7 | -11.638 | -1.184 | -1.928 | 1.00 | 1.00 | TAG C   |
| ATOM | 109 | NE2  | HIS | 7 | -10.556 | -0.463 | -2.179 | 1.00 | 1.00 | TAG N   |
| ATOM | 110 | H    | HIS | 7 | -7.124  | -2.050 | 0.433  | 1.00 | 1.00 | TAG H   |
| ATOM | 111 | HA   | HIS | 7 | -9.720  | -2.975 | 1.251  | 1.00 | 1.00 | TAG H   |
| ATOM | 112 | 1HB  | HIS | 7 | -7.975  | -3.257 | -1.212 | 1.00 | 1.00 | TAG H   |
| ATOM | 113 | 2HB  | HIS | 7 | -9.311  | -4.387 | -0.961 | 1.00 | 1.00 | TAG H   |
| ATOM | 114 | HD1  | HIS | 7 | -11.870 | -3.115 | -1.078 | 1.00 | 1.00 | TAG H   |

|      |     |     |     |    |         |         |        |      |      |     |   |
|------|-----|-----|-----|----|---------|---------|--------|------|------|-----|---|
| ATOM | 115 | HD2 | HIS | 7  | -8.451  | -0.825  | -1.874 | 1.00 | 1.00 | TAG | H |
| ATOM | 116 | HE1 | HIS | 7  | -12.673 | -0.876  | -2.136 | 1.00 | 1.00 | TAG | H |
| ATOM | 117 | N   | HIS | 8  | -7.140  | -4.818  | 1.749  | 1.00 | 1.00 | TAG | N |
| ATOM | 118 | CA  | HIS | 8  | -6.701  | -6.043  | 2.403  | 1.00 | 1.00 | TAG | C |
| ATOM | 119 | C   | HIS | 8  | -6.202  | -5.865  | 3.838  | 1.00 | 1.00 | TAG | C |
| ATOM | 120 | O   | HIS | 8  | -5.499  | -6.734  | 4.369  | 1.00 | 1.00 | TAG | O |
| ATOM | 121 | CB  | HIS | 8  | -5.680  | -6.779  | 1.545  | 1.00 | 1.00 | TAG | C |
| ATOM | 122 | CG  | HIS | 8  | -6.300  | -7.572  | 0.439  | 1.00 | 1.00 | TAG | C |
| ATOM | 123 | CD2 | HIS | 8  | -6.834  | -8.819  | 0.423  | 1.00 | 1.00 | TAG | C |
| ATOM | 124 | ND1 | HIS | 8  | -6.461  | -7.075  | -0.836 | 1.00 | 1.00 | TAG | N |
| ATOM | 125 | CE1 | HIS | 8  | -7.067  | -7.981  | -1.592 | 1.00 | 1.00 | TAG | C |
| ATOM | 126 | NE2 | HIS | 8  | -7.302  | -9.050  | -0.845 | 1.00 | 1.00 | TAG | N |
| ATOM | 127 | H   | HIS | 8  | -6.408  | -4.159  | 1.576  | 1.00 | 1.00 | TAG | H |
| ATOM | 128 | HA  | HIS | 8  | -7.605  | -6.660  | 2.501  | 1.00 | 1.00 | TAG | H |
| ATOM | 129 | 1HB | HIS | 8  | -4.979  | -6.049  | 1.114  | 1.00 | 1.00 | TAG | H |
| ATOM | 130 | 2HB | HIS | 8  | -5.091  | -7.452  | 2.184  | 1.00 | 1.00 | TAG | H |
| ATOM | 131 | HD2 | HIS | 8  | -6.883  | -9.518  | 1.272  | 1.00 | 1.00 | TAG | H |
| ATOM | 132 | HE1 | HIS | 8  | -7.330  | -7.865  | -2.654 | 1.00 | 1.00 | TAG | H |
| ATOM | 133 | HE2 | HIS | 8  | -7.747  | -9.889  | -1.155 | 1.00 | 1.00 | TAG | H |
| ATOM | 134 | N   | GLY | 9  | -6.750  | -4.758  | 4.464  | 1.00 | 1.00 | TAG | N |
| ATOM | 135 | CA  | GLY | 9  | -6.546  | -4.469  | 5.895  | 1.00 | 1.00 | TAG | C |
| ATOM | 136 | C   | GLY | 9  | -5.080  | -4.514  | 6.347  | 1.00 | 1.00 | TAG | C |
| ATOM | 137 | O   | GLY | 9  | -4.779  | -4.508  | 7.543  | 1.00 | 1.00 | TAG | O |
| ATOM | 138 | H   | GLY | 9  | -7.319  | -4.084  | 3.992  | 1.00 | 1.00 | TAG | H |
| ATOM | 139 | 1HA | GLY | 9  | -6.954  | -3.472  | 6.117  | 1.00 | 1.00 | TAG | H |
| ATOM | 140 | 2HA | GLY | 9  | -7.122  | -5.192  | 6.489  | 1.00 | 1.00 | TAG | H |
| ATOM | 141 | N   | TYR | 10 | -4.197  | -4.589  | 5.378  | 1.00 | 0.00 | TAG | N |
| ATOM | 142 | CA  | TYR | 10 | -2.767  | -4.487  | 5.657  | 1.00 | 0.00 | TAG | C |
| ATOM | 143 | C   | TYR | 10 | -2.299  | -3.055  | 5.561  | 1.00 | 0.00 | TAG | C |
| ATOM | 144 | O   | TYR | 10 | -1.190  | -2.788  | 5.154  | 1.00 | 0.00 | TAG | O |
| ATOM | 145 | CB  | TYR | 10 | -1.941  | -5.331  | 4.644  | 1.00 | 0.00 | TAG | C |
| ATOM | 146 | CG  | TYR | 10 | -2.133  | -6.852  | 4.696  | 1.00 | 0.00 | TAG | C |
| ATOM | 147 | CD1 | TYR | 10 | -2.748  | -7.454  | 5.799  | 1.00 | 0.00 | TAG | C |
| ATOM | 148 | CD2 | TYR | 10 | -1.701  | -7.644  | 3.629  | 1.00 | 0.00 | TAG | C |
| ATOM | 149 | CE1 | TYR | 10 | -2.930  | -8.834  | 5.828  | 1.00 | 0.00 | TAG | C |
| ATOM | 150 | CE2 | TYR | 10 | -1.884  | -9.023  | 3.660  | 1.00 | 0.00 | TAG | C |
| ATOM | 151 | CZ  | TYR | 10 | -2.498  | -9.617  | 4.760  | 1.00 | 0.00 | TAG | C |
| ATOM | 152 | OH  | TYR | 10 | -2.682  | -10.970 | 4.792  | 1.00 | 0.00 | TAG | O |
| ATOM | 153 | H   | TYR | 10 | -4.506  | -4.718  | 4.440  | 1.00 | 0.00 | TAG | H |
| ATOM | 154 | HA  | TYR | 10 | -2.577  | -4.838  | 6.689  | 1.00 | 0.00 | TAG | H |
| ATOM | 155 | 2HB | TYR | 10 | -0.861  | -5.127  | 4.783  | 1.00 | 0.00 | TAG | H |
| ATOM | 156 | 3HB | TYR | 10 | -2.141  | -4.968  | 3.614  | 1.00 | 0.00 | TAG | H |
| ATOM | 157 | 1HD | TYR | 10 | -3.091  | -6.854  | 6.629  | 1.00 | 0.00 | TAG | H |
| ATOM | 158 | 2HD | TYR | 10 | -1.233  | -7.188  | 2.767  | 1.00 | 0.00 | TAG | H |
| ATOM | 159 | 1HE | TYR | 10 | -3.410  | -9.301  | 6.675  | 1.00 | 0.00 | TAG | H |
| ATOM | 160 | 2HE | TYR | 10 | -1.550  | -9.623  | 2.827  | 1.00 | 0.00 | TAG | H |
| ATOM | 161 | HH  | TYR | 10 | -2.330  | -11.344 | 3.981  | 1.00 | 0.00 | TAG | H |
| ATOM | 162 | N   | LYS | 11 | -3.027  | -2.110  | 5.873  | 1.00 | 1.00 | TAG | N |
| ATOM | 163 | CA  | LYS | 11 | -2.650  | -0.704  | 5.792  | 1.00 | 1.00 | TAG | C |
| ATOM | 164 | C   | LYS | 11 | -2.427  | -0.156  | 7.188  | 1.00 | 1.00 | TAG | C |
| ATOM | 165 | O   | LYS | 11 | -1.573  | 0.727   | 7.357  | 1.00 | 1.00 | TAG | O |

|      |     |      |     |    |        |        |        |      |      |     |     |
|------|-----|------|-----|----|--------|--------|--------|------|------|-----|-----|
| ATOM | 166 | CB   | LYS | 11 | -3.743 | 0.091  | 5.077  | 1.00 | 1.00 | TAG | C   |
| ATOM | 167 | CG   | LYS | 11 | -3.438 | 1.561  | 4.878  | 1.00 | 1.00 | TAG | C   |
| ATOM | 168 | CD   | LYS | 11 | -4.246 | 2.090  | 3.707  | 1.00 | 1.00 | TAG | C   |
| ATOM | 169 | CE   | LYS | 11 | -4.018 | 3.569  | 3.466  | 1.00 | 1.00 | TAG | C   |
| ATOM | 170 | NZ   | LYS | 11 | -4.784 | 4.373  | 4.441  | 1.00 | 1.00 | TAG | N   |
| ATOM | 171 | H    | LYS | 11 | -3.956 | -2.238 | 6.220  | 1.00 | 1.00 | TAG | H   |
| ATOM | 172 | HA   | LYS | 11 | -1.716 | -0.610 | 5.219  | 1.00 | 1.00 | TAG | H   |
| ATOM | 173 | 1HB  | LYS | 11 | -3.925 | -0.367 | 4.093  | 1.00 | 1.00 | TAG | H   |
| ATOM | 174 | 2HB  | LYS | 11 | -4.677 | 0.000  | 5.652  | 1.00 | 1.00 | TAG | H   |
| ATOM | 175 | 1HG  | LYS | 11 | -3.681 | 2.125  | 5.790  | 1.00 | 1.00 | TAG | H   |
| ATOM | 176 | 2HG  | LYS | 11 | -2.363 | 1.703  | 4.690  | 1.00 | 1.00 | TAG | H   |
| ATOM | 177 | 1HD  | LYS | 11 | -3.981 | 1.528  | 2.799  | 1.00 | 1.00 | TAG | H   |
| ATOM | 178 | 2HD  | LYS | 11 | -5.316 | 1.912  | 3.894  | 1.00 | 1.00 | TAG | H   |
| ATOM | 179 | 1HE  | LYS | 11 | -2.946 | 3.800  | 3.550  | 1.00 | 1.00 | TAG | H   |
| ATOM | 180 | 2HE  | LYS | 11 | -4.323 | 3.832  | 2.443  | 1.00 | 1.00 | TAG | H   |
| ATOM | 181 | H01  | LYS | 11 | -4.885 | 5.316  | 4.095  | 1.00 | 1.00 | TAG | H   |
| ATOM | 182 | H02  | LYS | 11 | -4.294 | 4.389  | 5.324  | 1.00 | 1.00 | TAG | H   |
| ATOM | 183 | N    | ARG | 12 | -3.072 | -0.562 | 8.165  | 1.00 | 1.00 | TAG | N   |
| ATOM | 184 | CA   | ARG | 12 | -2.958 | -0.077 | 9.530  | 1.00 | 1.00 | TAG | C   |
| ATOM | 185 | C    | ARG | 12 | -1.449 | -0.075 | 9.762  | 1.00 | 1.00 | TAG | C   |
| ATOM | 186 | O    | ARG | 12 | -1.038 | 0.995  | 10.481 | 1.00 | 1.00 | TAG | O   |
| ATOM | 187 | CB   | ARG | 12 | -3.677 | -1.051 | 10.468 | 1.00 | 1.00 | TAG | C   |
| ATOM | 188 | CG   | ARG | 12 | -3.679 | -0.640 | 11.938 | 1.00 | 1.00 | TAG | C   |
| ATOM | 189 | CD   | ARG | 12 | -4.692 | -1.446 | 12.741 | 1.00 | 1.00 | TAG | C   |
| ATOM | 190 | NE   | ARG | 12 | -4.688 | -2.858 | 12.363 | 1.00 | 1.00 | TAG | N   |
| ATOM | 191 | CZ   | ARG | 12 | -5.784 | -3.565 | 12.089 | 1.00 | 1.00 | TAG | C   |
| ATOM | 192 | NH1  | ARG | 12 | -6.985 | -2.995 | 12.153 | 1.00 | 1.00 | TAG | N   |
| ATOM | 193 | NH2  | ARG | 12 | -5.675 | -4.840 | 11.727 | 1.00 | 1.00 | TAG | N1+ |
| ATOM | 194 | H    | ARG | 12 | -3.752 | -1.290 | 8.078  | 1.00 | 1.00 | TAG | H   |
| ATOM | 195 | HA   | ARG | 12 | -3.407 | 0.911  | 9.708  | 1.00 | 1.00 | TAG | H   |
| ATOM | 196 | 1HB  | ARG | 12 | -4.719 | -1.161 | 10.131 | 1.00 | 1.00 | TAG | H   |
| ATOM | 197 | 2HB  | ARG | 12 | -3.203 | -2.040 | 10.378 | 1.00 | 1.00 | TAG | H   |
| ATOM | 198 | 1HG  | ARG | 12 | -2.675 | -0.784 | 12.363 | 1.00 | 1.00 | TAG | H   |
| ATOM | 199 | 2HG  | ARG | 12 | -3.912 | 0.431  | 12.020 | 1.00 | 1.00 | TAG | H   |
| ATOM | 200 | 1HD  | ARG | 12 | -4.466 | -1.353 | 13.814 | 1.00 | 1.00 | TAG | H   |
| ATOM | 201 | 2HD  | ARG | 12 | -5.698 | -1.029 | 12.587 | 1.00 | 1.00 | TAG | H   |
| ATOM | 202 | HE   | ARG | 12 | -3.805 | -3.324 | 12.307 | 1.00 | 1.00 | TAG | H   |
| ATOM | 203 | 1HH1 | ARG | 12 | -7.069 | -2.032 | 12.409 | 1.00 | 1.00 | TAG | H   |
| ATOM | 204 | 2HH1 | ARG | 12 | -7.805 | -3.531 | 11.946 | 1.00 | 1.00 | TAG | H   |
| ATOM | 205 | H01  | ARG | 12 | -5.797 | -4.918 | 10.727 | 1.00 | 1.00 | TAG | H   |
| ATOM | 206 | H02  | ARG | 12 | -6.383 | -5.386 | 12.197 | 1.00 | 1.00 | TAG | H   |
| ATOM | 207 | H03  | ARG | 12 | -4.761 | -5.185 | 11.982 | 1.00 | 1.00 | TAG | H   |
| ATOM | 208 | N    | LYS | 13 | -0.671 | -0.938 | 9.575  | 1.00 | 1.00 | TAG | N   |
| ATOM | 209 | CA   | LYS | 13 | 0.716  | -0.986 | 10.023 | 1.00 | 1.00 | TAG | C   |
| ATOM | 210 | C    | LYS | 13 | 1.311  | 0.416  | 10.040 | 1.00 | 1.00 | TAG | C   |
| ATOM | 211 | O    | LYS | 13 | 2.068  | 0.751  | 10.964 | 1.00 | 1.00 | TAG | O   |
| ATOM | 212 | CB   | LYS | 13 | 1.542  | -1.898 | 9.111  | 1.00 | 1.00 | TAG | C   |
| ATOM | 213 | CG   | LYS | 13 | 1.248  | -3.364 | 9.309  | 1.00 | 1.00 | TAG | C   |
| ATOM | 214 | CD   | LYS | 13 | 2.054  | -4.226 | 8.361  | 1.00 | 1.00 | TAG | C   |
| ATOM | 215 | CE   | LYS | 13 | 1.693  | -5.694 | 8.575  | 1.00 | 1.00 | TAG | C   |
| ATOM | 216 | NZ   | LYS | 13 | 2.258  | -6.587 | 7.532  | 1.00 | 1.00 | TAG | N   |



|      |     |     |     |    |        |        |        |      |      |       |
|------|-----|-----|-----|----|--------|--------|--------|------|------|-------|
| ATOM | 217 | H   | LYS | 13 | -0.922 | -1.757 | 9.058  | 1.00 | 1.00 | TAG H |
| ATOM | 218 | HA  | LYS | 13 | 0.739  | -1.395 | 11.043 | 1.00 | 1.00 | TAG H |
| ATOM | 219 | 1HB | LYS | 13 | 1.347  | -1.631 | 8.062  | 1.00 | 1.00 | TAG H |
| ATOM | 220 | 2HB | LYS | 13 | 2.612  | -1.718 | 9.295  | 1.00 | 1.00 | TAG H |
| ATOM | 221 | 1HG | LYS | 13 | 1.474  | -3.648 | 10.347 | 1.00 | 1.00 | TAG H |
| ATOM | 222 | 2HG | LYS | 13 | 0.174  | -3.549 | 9.152  | 1.00 | 1.00 | TAG H |
| ATOM | 223 | 1HD | LYS | 13 | 1.851  | -3.935 | 7.321  | 1.00 | 1.00 | TAG H |
| ATOM | 224 | 2HD | LYS | 13 | 3.130  | -4.073 | 8.533  | 1.00 | 1.00 | TAG H |
| ATOM | 225 | 1HE | LYS | 13 | 2.057  | -6.015 | 9.562  | 1.00 | 1.00 | TAG H |
| ATOM | 226 | 2HE | LYS | 13 | 0.598  | -5.798 | 8.585  | 1.00 | 1.00 | TAG H |
| ATOM | 227 | H01 | LYS | 13 | 2.295  | -6.095 | 6.651  | 1.00 | 1.00 | TAG H |
| ATOM | 228 | H02 | LYS | 13 | 1.674  | -7.406 | 7.437  | 1.00 | 1.00 | TAG H |
| ATOM | 229 | N   | PHE | 14 | 1.037  | 1.255  | 9.107  | 1.00 | 1.00 | TAG N |
| ATOM | 230 | CA  | PHE | 14 | 1.564  | 2.618  | 9.060  | 1.00 | 1.00 | TAG C |
| ATOM | 231 | C   | PHE | 14 | 0.557  | 3.665  | 9.522  | 1.00 | 1.00 | TAG C |
| ATOM | 232 | O   | PHE | 14 | 0.934  | 4.644  | 10.172 | 1.00 | 1.00 | TAG O |
| ATOM | 233 | CB  | PHE | 14 | 2.114  | 2.949  | 7.672  | 1.00 | 1.00 | TAG C |
| ATOM | 234 | CG  | PHE | 14 | 3.258  | 2.066  | 7.254  | 1.00 | 1.00 | TAG C |
| ATOM | 235 | CD1 | PHE | 14 | 3.115  | 1.175  | 6.193  | 1.00 | 1.00 | TAG C |
| ATOM | 236 | CD2 | PHE | 14 | 4.478  | 2.108  | 7.940  | 1.00 | 1.00 | TAG C |
| ATOM | 237 | CE1 | PHE | 14 | 4.172  | 0.345  | 5.809  | 1.00 | 1.00 | TAG C |
| ATOM | 238 | CE2 | PHE | 14 | 5.545  | 1.287  | 7.563  | 1.00 | 1.00 | TAG C |
| ATOM | 239 | CZ  | PHE | 14 | 5.392  | 0.403  | 6.495  | 1.00 | 1.00 | TAG C |
| ATOM | 240 | H   | PHE | 14 | 0.438  | 1.034  | 8.337  | 1.00 | 1.00 | TAG H |
| ATOM | 241 | HA  | PHE | 14 | 2.397  | 2.654  | 9.779  | 1.00 | 1.00 | TAG H |
| ATOM | 242 | 1HB | PHE | 14 | 1.303  | 2.859  | 6.934  | 1.00 | 1.00 | TAG H |
| ATOM | 243 | 2HB | PHE | 14 | 2.446  | 3.998  | 7.658  | 1.00 | 1.00 | TAG H |
| ATOM | 244 | HD1 | PHE | 14 | 2.159  | 1.125  | 5.652  | 1.00 | 1.00 | TAG H |
| ATOM | 245 | HD2 | PHE | 14 | 4.599  | 2.799  | 8.787  | 1.00 | 1.00 | TAG H |
| ATOM | 246 | HE1 | PHE | 14 | 4.046  | -0.352 | 4.967  | 1.00 | 1.00 | TAG H |
| ATOM | 247 | HE2 | PHE | 14 | 6.499  | 1.337  | 8.107  | 1.00 | 1.00 | TAG H |
| ATOM | 248 | HZ  | PHE | 14 | 6.226  | -0.247 | 6.194  | 1.00 | 1.00 | TAG H |
| ATOM | 249 | N   | HIS | 15 | -0.735 | 3.453  | 9.186  | 1.00 | 0.00 | TAG N |
| ATOM | 250 | CA  | HIS | 15 | -1.827 | 4.291  | 9.674  | 1.00 | 0.00 | TAG C |
| ATOM | 251 | C   | HIS | 15 | -1.856 | 4.319  | 11.183 | 1.00 | 0.00 | TAG C |
| ATOM | 252 | O   | HIS | 15 | -2.341 | 5.281  | 11.819 | 1.00 | 0.00 | TAG O |
| ATOM | 253 | CB  | HIS | 15 | -3.124 | 3.673  | 9.124  | 1.00 | 0.00 | TAG C |
| ATOM | 254 | CG  | HIS | 15 | -4.313 | 4.564  | 9.335  | 1.00 | 0.00 | TAG C |
| ATOM | 255 | CD2 | HIS | 15 | -4.811 | 5.399  | 8.344  | 1.00 | 0.00 | TAG C |
| ATOM | 256 | ND1 | HIS | 15 | -5.053 | 4.672  | 10.511 | 1.00 | 0.00 | TAG N |
| ATOM | 257 | CE1 | HIS | 15 | -5.960 | 5.589  | 10.129 | 1.00 | 0.00 | TAG C |
| ATOM | 258 | NE2 | HIS | 15 | -5.890 | 6.071  | 8.858  | 1.00 | 0.00 | TAG N |
| ATOM | 259 | H   | HIS | 15 | -0.969 | 2.628  | 8.529  | 1.00 | 0.00 | TAG H |
| ATOM | 260 | HA  | HIS | 15 | -1.629 | 5.324  | 9.342  | 1.00 | 0.00 | TAG H |
| ATOM | 261 | 2HB | HIS | 15 | -3.339 | 2.698  | 9.605  | 1.00 | 0.00 | TAG H |
| ATOM | 262 | 3HB | HIS | 15 | -3.056 | 3.456  | 8.037  | 1.00 | 0.00 | TAG H |
| ATOM | 263 | 2HD | HIS | 15 | -4.396 | 5.482  | 7.344  | 1.00 | 0.00 | TAG H |
| ATOM | 264 | 1HE | HIS | 15 | -6.702 | 5.894  | 10.856 | 1.00 | 0.00 | TAG H |
| ATOM | 265 | 2HE | HIS | 15 | -6.490 | 6.767  | 8.392  | 1.00 | 0.00 | TAG H |
| ATOM | 266 | N   | GLU | 16 | -1.321 | 3.297  | 11.850 | 1.00 | 1.00 | TAG N |
| ATOM | 267 | CA  | GLU | 16 | -1.253 | 3.214  | 13.307 | 1.00 | 1.00 | TAG C |

|      |     |     |     |    |        |       |        |      |      |         |
|------|-----|-----|-----|----|--------|-------|--------|------|------|---------|
| ATOM | 268 | C   | GLU | 16 | -0.840 | 4.572 | 13.859 | 1.00 | 1.00 | TAG C   |
| ATOM | 269 | O   | GLU | 16 | -1.663 | 5.246 | 14.501 | 1.00 | 1.00 | TAG O   |
| ATOM | 270 | CB  | GLU | 16 | -0.233 | 2.164 | 13.732 | 1.00 | 1.00 | TAG C   |
| ATOM | 271 | CG  | GLU | 16 | -0.161 | 1.948 | 15.235 | 1.00 | 1.00 | TAG C   |
| ATOM | 272 | CD  | GLU | 16 | 1.013  | 1.081 | 15.651 | 1.00 | 1.00 | TAG C   |
| ATOM | 273 | OE1 | GLU | 16 | 1.960  | 0.929 | 14.851 | 1.00 | 1.00 | TAG O   |
| ATOM | 274 | OE2 | GLU | 16 | 1.014  | 0.573 | 16.796 | 1.00 | 1.00 | TAG O   |
| ATOM | 275 | H   | GLU | 16 | -0.937 | 2.496 | 11.391 | 1.00 | 1.00 | TAG H   |
| ATOM | 276 | HA  | GLU | 16 | -2.240 | 2.928 | 13.699 | 1.00 | 1.00 | TAG H   |
| ATOM | 277 | 1HB | GLU | 16 | -0.480 | 1.209 | 13.245 | 1.00 | 1.00 | TAG H   |
| ATOM | 278 | 2HB | GLU | 16 | 0.761  | 2.464 | 13.368 | 1.00 | 1.00 | TAG H   |
| ATOM | 279 | 1HG | GLU | 16 | -0.086 | 2.923 | 15.738 | 1.00 | 1.00 | TAG H   |
| ATOM | 280 | 2HG | GLU | 16 | -1.095 | 1.480 | 15.578 | 1.00 | 1.00 | TAG H   |
| ATOM | 281 | H01 | GLU | 16 | 1.919  | 0.429 | 17.082 | 1.00 | 1.00 | TAG H   |
| ATOM | 282 | N   | LYS | 17 | 0.383  | 5.004 | 13.637 | 1.00 | 1.00 | TAG N   |
| ATOM | 283 | CA  | LYS | 17 | 0.910  | 6.258 | 14.165 | 1.00 | 1.00 | TAG C   |
| ATOM | 284 | C   | LYS | 17 | 1.368  | 7.140 | 13.022 | 1.00 | 1.00 | TAG C   |
| ATOM | 285 | O   | LYS | 17 | 1.042  | 8.332 | 12.979 | 1.00 | 1.00 | TAG O   |
| ATOM | 286 | CB  | LYS | 17 | 2.073  | 5.977 | 15.119 | 1.00 | 1.00 | TAG C   |
| ATOM | 287 | CG  | LYS | 17 | 2.667  | 7.202 | 15.780 | 1.00 | 1.00 | TAG C   |
| ATOM | 288 | CD  | LYS | 17 | 3.351  | 6.794 | 17.072 | 1.00 | 1.00 | TAG C   |
| ATOM | 289 | CE  | LYS | 17 | 4.001  | 7.967 | 17.779 | 1.00 | 1.00 | TAG C   |
| ATOM | 290 | NZ  | LYS | 17 | 5.285  | 8.311 | 17.133 | 1.00 | 1.00 | TAG N1+ |
| ATOM | 291 | H   | LYS | 17 | 1.044  | 4.497 | 13.085 | 1.00 | 1.00 | TAG H   |
| ATOM | 292 | HA  | LYS | 17 | 0.117  | 6.779 | 14.723 | 1.00 | 1.00 | TAG H   |
| ATOM | 293 | 1HB | LYS | 17 | 1.726  | 5.287 | 15.903 | 1.00 | 1.00 | TAG H   |
| ATOM | 294 | 2HB | LYS | 17 | 2.866  | 5.457 | 14.562 | 1.00 | 1.00 | TAG H   |
| ATOM | 295 | 1HG | LYS | 17 | 3.390  | 7.683 | 15.105 | 1.00 | 1.00 | TAG H   |
| ATOM | 296 | 2HG | LYS | 17 | 1.878  | 7.941 | 15.985 | 1.00 | 1.00 | TAG H   |
| ATOM | 297 | 1HD | LYS | 17 | 2.614  | 6.329 | 17.743 | 1.00 | 1.00 | TAG H   |
| ATOM | 298 | 2HD | LYS | 17 | 4.114  | 6.031 | 16.855 | 1.00 | 1.00 | TAG H   |
| ATOM | 299 | 1HE | LYS | 17 | 3.328  | 8.837 | 17.757 | 1.00 | 1.00 | TAG H   |
| ATOM | 300 | 2HE | LYS | 17 | 4.171  | 7.719 | 18.837 | 1.00 | 1.00 | TAG H   |
| ATOM | 301 | 1HZ | LYS | 17 | 5.926  | 8.648 | 17.822 | 1.00 | 1.00 | TAG H   |
| ATOM | 302 | 2HZ | LYS | 17 | 5.666  | 7.498 | 16.694 | 1.00 | 1.00 | TAG H   |
| ATOM | 303 | 3HZ | LYS | 17 | 5.132  | 9.021 | 16.444 | 1.00 | 1.00 | TAG H   |
| ATOM | 304 | N   | HIS | 18 | 1.949  | 6.568 | 12.003 | 1.00 | 1.00 | TAG N   |
| ATOM | 305 | CA  | HIS | 18 | 2.356  | 7.275 | 10.766 | 1.00 | 1.00 | TAG C   |
| ATOM | 306 | C   | HIS | 18 | 1.149  | 7.935 | 10.141 | 1.00 | 1.00 | TAG C   |
| ATOM | 307 | O   | HIS | 18 | 1.248  | 9.078 | 9.626  | 1.00 | 1.00 | TAG O   |
| ATOM | 308 | CB  | HIS | 18 | 2.943  | 6.114 | 9.780  | 1.00 | 1.00 | TAG C   |
| ATOM | 309 | CG  | HIS | 18 | 3.242  | 6.821 | 8.477  | 1.00 | 1.00 | TAG C   |
| ATOM | 310 | CD2 | HIS | 18 | 2.592  | 6.586 | 7.273  | 1.00 | 1.00 | TAG C   |
| ATOM | 311 | ND1 | HIS | 18 | 4.208  | 7.705 | 8.171  | 1.00 | 1.00 | TAG N   |
| ATOM | 312 | CE1 | HIS | 18 | 4.199  | 8.070 | 6.916  | 1.00 | 1.00 | TAG C   |
| ATOM | 313 | NE2 | HIS | 18 | 3.159  | 7.437 | 6.373  | 1.00 | 1.00 | TAG N   |
| ATOM | 314 | H   | HIS | 18 | 2.164  | 5.592 | 11.986 | 1.00 | 1.00 | TAG H   |
| ATOM | 315 | HA  | HIS | 18 | 3.102  | 8.060 | 10.958 | 1.00 | 1.00 | TAG H   |
| ATOM | 316 | 1HB | HIS | 18 | 3.849  | 5.654 | 10.202 | 1.00 | 1.00 | TAG H   |
| ATOM | 317 | 2HB | HIS | 18 | 2.210  | 5.306 | 9.636  | 1.00 | 1.00 | TAG H   |
| ATOM | 318 | HD1 | HIS | 18 | 4.868  | 8.049 | 8.839  | 1.00 | 1.00 | TAG H   |

|      |     |     |     |    |        |        |        |      |      |     |   |
|------|-----|-----|-----|----|--------|--------|--------|------|------|-----|---|
| ATOM | 319 | HD2 | HIS | 18 | 1.785  | 5.863  | 7.085  | 1.00 | 1.00 | TAG | H |
| ATOM | 320 | HE1 | HIS | 18 | 4.900  | 8.754  | 6.415  | 1.00 | 1.00 | TAG | H |
| ATOM | 321 | N   | HIS | 19 | 0.070  | 7.219  | 9.918  | 1.00 | 1.00 | TAG | N |
| ATOM | 322 | CA  | HIS | 19 | -1.160 | 7.780  | 9.377  | 1.00 | 1.00 | TAG | C |
| ATOM | 323 | C   | HIS | 19 | -1.754 | 8.934  | 10.186 | 1.00 | 1.00 | TAG | C |
| ATOM | 324 | O   | HIS | 19 | -2.264 | 9.975  | 9.753  | 1.00 | 1.00 | TAG | O |
| ATOM | 325 | CB  | HIS | 19 | -2.189 | 6.686  | 9.126  | 1.00 | 1.00 | TAG | C |
| ATOM | 326 | CG  | HIS | 19 | -1.955 | 5.933  | 7.856  | 1.00 | 1.00 | TAG | C |
| ATOM | 327 | CD2 | HIS | 19 | -1.240 | 4.756  | 7.808  | 1.00 | 1.00 | TAG | C |
| ATOM | 328 | ND1 | HIS | 19 | -2.309 | 6.206  | 6.574  | 1.00 | 1.00 | TAG | N |
| ATOM | 329 | CE1 | HIS | 19 | -1.809 | 5.202  | 5.787  | 1.00 | 1.00 | TAG | C |
| ATOM | 330 | NE2 | HIS | 19 | -1.164 | 4.335  | 6.553  | 1.00 | 1.00 | TAG | N |
| ATOM | 331 | H   | HIS | 19 | 0.016  | 6.238  | 10.104 | 1.00 | 1.00 | TAG | H |
| ATOM | 332 | HA  | HIS | 19 | -0.874 | 8.236  | 8.418  | 1.00 | 1.00 | TAG | H |
| ATOM | 333 | 1HB | HIS | 19 | -2.177 | 5.980  | 9.969  | 1.00 | 1.00 | TAG | H |
| ATOM | 334 | 2HB | HIS | 19 | -3.192 | 7.136  | 9.097  | 1.00 | 1.00 | TAG | H |
| ATOM | 335 | HD2 | HIS | 19 | -0.800 | 4.245  | 8.677  | 1.00 | 1.00 | TAG | H |
| ATOM | 336 | HE1 | HIS | 19 | -1.924 | 5.128  | 4.696  | 1.00 | 1.00 | TAG | H |
| ATOM | 337 | HE2 | HIS | 19 | -0.700 | 3.506  | 6.239  | 1.00 | 1.00 | TAG | H |
| ATOM | 338 | N   | SER | 20 | -1.670 | 8.706  | 11.570 | 1.00 | 1.00 | TAG | N |
| ATOM | 339 | CA  | SER | 20 | -2.008 | 9.759  | 12.530 | 1.00 | 1.00 | TAG | C |
| ATOM | 340 | C   | SER | 20 | -1.131 | 10.999 | 12.432 | 1.00 | 1.00 | TAG | C |
| ATOM | 341 | CB  | SER | 20 | -1.907 | 9.202  | 13.953 | 1.00 | 1.00 | TAG | C |
| ATOM | 342 | OG  | SER | 20 | -2.083 | 10.236 | 14.904 | 1.00 | 1.00 | TAG | O |
| ATOM | 343 | O01 | SER | 20 | -1.378 | 11.806 | 13.586 | 1.00 | 1.00 | TAG | O |
| ATOM | 344 | H   | SER | 20 | -1.384 | 7.841  | 11.982 | 1.00 | 1.00 | TAG | H |
| ATOM | 345 | HA  | SER | 20 | -3.034 | 10.072 | 12.285 | 1.00 | 1.00 | TAG | H |
| ATOM | 346 | 1HB | SER | 20 | -2.668 | 8.423  | 14.103 | 1.00 | 1.00 | TAG | H |
| ATOM | 347 | 2HB | SER | 20 | -0.926 | 8.726  | 14.098 | 1.00 | 1.00 | TAG | H |
| ATOM | 348 | HG  | SER | 20 | -2.740 | 10.904 | 14.553 | 1.00 | 1.00 | TAG | H |
| ATOM | 349 | N   | HIS | 21 | 0.225  | 10.764 | 12.360 | 1.00 | 1.00 | TAG | N |
| ATOM | 350 | CA  | HIS | 21 | 1.191  | 11.827 | 12.119 | 1.00 | 1.00 | TAG | C |
| ATOM | 351 | C   | HIS | 21 | 0.582  | 13.177 | 11.736 | 1.00 | 1.00 | TAG | C |
| ATOM | 352 | O   | HIS | 21 | 0.840  | 14.286 | 12.217 | 1.00 | 1.00 | TAG | O |
| ATOM | 353 | CB  | HIS | 21 | 2.244  | 11.381 | 11.112 | 1.00 | 1.00 | TAG | C |
| ATOM | 354 | CG  | HIS | 21 | 3.312  | 10.526 | 11.712 | 1.00 | 1.00 | TAG | C |
| ATOM | 355 | CD2 | HIS | 21 | 3.257  | 9.149  | 11.702 | 1.00 | 1.00 | TAG | C |
| ATOM | 356 | ND1 | HIS | 21 | 4.451  | 10.848 | 12.376 | 1.00 | 1.00 | TAG | N |
| ATOM | 357 | CE1 | HIS | 21 | 5.055  | 9.676  | 12.750 | 1.00 | 1.00 | TAG | C |
| ATOM | 358 | NE2 | HIS | 21 | 4.316  | 8.657  | 12.332 | 1.00 | 1.00 | TAG | N |
| ATOM | 359 | H   | HIS | 21 | 0.635  | 9.858  | 12.467 | 1.00 | 1.00 | TAG | H |
| ATOM | 360 | HA  | HIS | 21 | 1.673  | 12.009 | 13.091 | 1.00 | 1.00 | TAG | H |
| ATOM | 361 | 1HB | HIS | 21 | 1.752  | 10.826 | 10.300 | 1.00 | 1.00 | TAG | H |
| ATOM | 362 | 2HB | HIS | 21 | 2.708  | 12.271 | 10.660 | 1.00 | 1.00 | TAG | H |
| ATOM | 363 | HD1 | HIS | 21 | 4.789  | 11.772 | 12.559 | 1.00 | 1.00 | TAG | H |
| ATOM | 364 | HD2 | HIS | 21 | 2.457  | 8.549  | 11.243 | 1.00 | 1.00 | TAG | H |
| ATOM | 365 | HE1 | HIS | 21 | 6.001  | 9.593  | 13.306 | 1.00 | 1.00 | TAG | H |
| ATOM | 366 | N   | ARG | 22 | -0.356 | 13.095 | 10.733 | 1.00 | 1.00 | TAG | N |
| ATOM | 367 | CA  | ARG | 22 | -1.205 | 14.216 | 10.365 | 1.00 | 1.00 | TAG | C |
| ATOM | 368 | C   | ARG | 22 | -1.900 | 14.557 | 11.681 | 1.00 | 1.00 | TAG | C |
| ATOM | 369 | O   | ARG | 22 | -2.179 | 15.748 | 11.886 | 1.00 | 1.00 | TAG | O |

|      |     |      |     |    |        |        |        |      |      |     |     |
|------|-----|------|-----|----|--------|--------|--------|------|------|-----|-----|
| ATOM | 370 | CB   | ARG | 22 | -2.203 | 13.759 | 9.296  | 1.00 | 1.00 | TAG | C   |
| ATOM | 371 | CG   | ARG | 22 | -3.132 | 14.853 | 8.779  | 1.00 | 1.00 | TAG | C   |
| ATOM | 372 | CD   | ARG | 22 | -3.835 | 14.427 | 7.496  | 1.00 | 1.00 | TAG | C   |
| ATOM | 373 | NE   | ARG | 22 | -4.282 | 13.037 | 7.556  | 1.00 | 1.00 | TAG | N   |
| ATOM | 374 | CZ   | ARG | 22 | -4.065 | 12.136 | 6.599  | 1.00 | 1.00 | TAG | C   |
| ATOM | 375 | NH1  | ARG | 22 | -3.407 | 12.475 | 5.492  | 1.00 | 1.00 | TAG | N   |
| ATOM | 376 | NH2  | ARG | 22 | -4.489 | 10.885 | 6.758  | 1.00 | 1.00 | TAG | N1+ |
| ATOM | 377 | H    | ARG | 22 | -0.517 | 12.269 | 10.195 | 1.00 | 1.00 | TAG | H   |
| ATOM | 378 | HA   | ARG | 22 | -0.672 | 15.080 | 9.939  | 1.00 | 1.00 | TAG | H   |
| ATOM | 379 | 1HB  | ARG | 22 | -1.642 | 13.342 | 8.446  | 1.00 | 1.00 | TAG | H   |
| ATOM | 380 | 2HB  | ARG | 22 | -2.814 | 12.944 | 9.710  | 1.00 | 1.00 | TAG | H   |
| ATOM | 381 | 1HG  | ARG | 22 | -3.883 | 15.093 | 9.547  | 1.00 | 1.00 | TAG | H   |
| ATOM | 382 | 2HG  | ARG | 22 | -2.555 | 15.771 | 8.595  | 1.00 | 1.00 | TAG | H   |
| ATOM | 383 | 1HD  | ARG | 22 | -4.700 | 15.084 | 7.316  | 1.00 | 1.00 | TAG | H   |
| ATOM | 384 | 2HD  | ARG | 22 | -3.151 | 14.556 | 6.643  | 1.00 | 1.00 | TAG | H   |
| ATOM | 385 | HE   | ARG | 22 | -4.785 | 12.743 | 8.369  | 1.00 | 1.00 | TAG | H   |
| ATOM | 386 | 1HH1 | ARG | 22 | -3.072 | 13.410 | 5.375  | 1.00 | 1.00 | TAG | H   |
| ATOM | 387 | 2HH1 | ARG | 22 | -3.247 | 11.794 | 4.777  | 1.00 | 1.00 | TAG | H   |
| ATOM | 388 | H01  | ARG | 22 | -4.579 | 10.682 | 7.743  | 1.00 | 1.00 | TAG | H   |
| ATOM | 389 | H02  | ARG | 22 | -3.825 | 10.248 | 6.342  | 1.00 | 1.00 | TAG | H   |
| ATOM | 390 | H03  | ARG | 22 | -5.387 | 10.775 | 6.309  | 1.00 | 1.00 | TAG | H   |
| ATOM | 391 | N    | GLY | 23 | -2.200 | 13.765 | 12.538 | 1.00 | 1.00 | TAG | N   |
| ATOM | 392 | CA   | GLY | 23 | -2.753 | 14.033 | 13.861 | 1.00 | 1.00 | TAG | C   |
| ATOM | 393 | C    | GLY | 23 | -1.981 | 15.144 | 14.573 | 1.00 | 1.00 | TAG | C   |
| ATOM | 394 | O    | GLY | 23 | -2.573 | 16.131 | 15.016 | 1.00 | 1.00 | TAG | O   |
| ATOM | 395 | 1HA  | GLY | 23 | -3.810 | 14.320 | 13.768 | 1.00 | 1.00 | TAG | H   |
| ATOM | 396 | 2HA  | GLY | 23 | -2.720 | 13.116 | 14.467 | 1.00 | 1.00 | TAG | H   |
| ATOM | 397 | H01  | GLY | 23 | -2.050 | 12.792 | 12.312 | 1.00 | 1.00 | TAG | H   |
| ATOM | 398 | N    | TYR | 24 | -0.690 | 15.014 | 14.678 | 1.00 | 0.00 | TAG | N   |
| ATOM | 399 | CA   | TYR | 24 | 0.202  | 15.874 | 15.451 | 1.00 | 0.00 | TAG | C   |
| ATOM | 400 | C    | TYR | 24 | -0.332 | 17.284 | 15.519 | 1.00 | 0.00 | TAG | C   |
| ATOM | 401 | O    | TYR | 24 | -0.844 | 17.868 | 14.582 | 1.00 | 0.00 | TAG | O   |
| ATOM | 402 | CB   | TYR | 24 | 1.618  | 15.927 | 14.807 | 1.00 | 0.00 | TAG | C   |
| ATOM | 403 | CG   | TYR | 24 | 2.667  | 16.789 | 15.520 | 1.00 | 0.00 | TAG | C   |
| ATOM | 404 | CD1  | TYR | 24 | 3.305  | 16.325 | 16.674 | 1.00 | 0.00 | TAG | C   |
| ATOM | 405 | CD2  | TYR | 24 | 2.997  | 18.047 | 15.008 | 1.00 | 0.00 | TAG | C   |
| ATOM | 406 | CE1  | TYR | 24 | 4.266  | 17.110 | 17.304 | 1.00 | 0.00 | TAG | C   |
| ATOM | 407 | CE2  | TYR | 24 | 3.958  | 18.831 | 15.639 | 1.00 | 0.00 | TAG | C   |
| ATOM | 408 | CZ   | TYR | 24 | 4.592  | 18.362 | 16.787 | 1.00 | 0.00 | TAG | C   |
| ATOM | 409 | OH   | TYR | 24 | 5.538  | 19.128 | 17.407 | 1.00 | 0.00 | TAG | O   |
| ATOM | 410 | OXT  | TYR | 24 | -0.241 | 18.006 | 16.762 | 0.00 | 0.00 | TAG | O   |
| ATOM | 411 | H    | TYR | 24 | -0.251 | 14.220 | 14.161 | 1.00 | 0.00 | TAG | H   |
| ATOM | 412 | HA   | TYR | 24 | 0.268  | 15.486 | 16.485 | 1.00 | 0.00 | TAG | H   |
| ATOM | 413 | 2HB  | TYR | 24 | 1.539  | 16.294 | 13.764 | 1.00 | 0.00 | TAG | H   |
| ATOM | 414 | 3HB  | TYR | 24 | 2.006  | 14.894 | 14.688 | 1.00 | 0.00 | TAG | H   |
| ATOM | 415 | 1HD  | TYR | 24 | 3.063  | 15.352 | 17.080 | 1.00 | 0.00 | TAG | H   |
| ATOM | 416 | 2HD  | TYR | 24 | 2.516  | 18.413 | 14.110 | 1.00 | 0.00 | TAG | H   |
| ATOM | 417 | 1HE  | TYR | 24 | 4.765  | 16.751 | 18.192 | 1.00 | 0.00 | TAG | H   |
| ATOM | 418 | 2HE  | TYR | 24 | 4.208  | 19.798 | 15.230 | 1.00 | 0.00 | TAG | H   |
| ATOM | 419 | HH   | TYR | 24 | 5.634  | 19.947 | 16.917 | 1.00 | 0.00 | TAG | H   |
| ATOM | 420 | H01  | TYR | 24 | 0.298  | 17.509 | 17.382 | 0.00 | 0.00 | TAG | H   |

END
